# Supplementary material for: Chemistry and biology of khafrefungin. Large-scale synthesis, design, and structure–activity relationship of khafrefungin, an antifungal agent
Source: Royal Society of Chemistry journal article supplement (doi:10.1039/b305818b), 2003-01-01
Supplement: b305818b.doc [file b305818b.doc]

**Chemistry and biology of khafrefungin. Large-scale synthesis, design, and structure–activity relationship of khafrefungin, an antifungal agent**

**Masayuki Nakamura,a Yuichiro Mori,a Kennichi Okuyama,a Kunihiro Tanikawa,a Satoshi Yasuda,b Kentaro Hanada,b and Shu Kobayashi*a**

**a** Graduate School of Pharmaceutical Sciences, The University of Tokyo, Hongo, Bunkyo-ku, Tokyo 113-0033, Japan

b Department of and Cell Biology, National Institute of Infectious Diseases, Toyama, Shinjuku-ku, Tokyo 162-8640, Japan

FAX +81-3-5684-0634; E-mail: skobayas@mol.f.u-tokyo.ac.jp

# Electronic Supplementary Information

# Full Experimental Section

# General: IR spectra were recorded on a JASCO FT/IR-610. 1H and 13C NMR spectra were recorded on a JEOL JNM-LA300, JNM-LA400 or a JNM-LA500 spectrometer in CDCl3 unless otherwise noted. Tetramethylsilane (TMS) served as internal standard ( 0) for 1H NMR, and CDCl3 was used as internal standard ( 77.0) for 13C NMR. When CD3OD was used, CD3OD served as internal standard ( 3.3) for 1H NMR, and ( 49.0) for 13C NMR. HPLC was carried out using a Shimadzu C-R6A chromatopac, SPD-10A, and LC-10AT. Optical rotations were recorded on a JASCO P-1010. Column chromatography was performed on Silica gel 60 (Merck). Mass spectra were recorded on a JEOL JMS-SX102A mass spectrometer and on a micromass Quattro II and Q-Toff-2 instrument. Preparative thin layer chromatography was performed on Wakogel B5F or using Silica gel 60 F254 (Merck). All non-aqueous reactions were performed under an oxygen-free atmosphere of argon with rigid exclusion of moisture from reagents and glassware. All solvents were purified according to standard procedures.

# Growth inhibition was determined according to the procedure shown in Ref 4.

# Synthesis of khafrefungin (1)

# (2*R*)-2-Methyl-3-(benzyloxy)propyl 4-methylbenzenesulfonate 9

# To a solution of (*R*)-(-)-3-hydroxy-2-methylpropionate (10.0 mL, 90.2 mmol) and benzyl 2,2,2-trichloroacetimidate (21.1 mL, 108 mmol) in diethyl ether (300 mL) was added trifluoromethanesulfonic acid (1.20 mL, 12.6 mmol) dropwise. After stirred at room temperature for 3 h, the reaction mixture was cooled to 0 ˚C and quenched with saturated NaHCO3. The organic layer was separated and the aqueous layer was extracted with diethyl ether. The combined organic layer was washed with brine, dried over Na2SO4, and evaporated. The resulting residue was filtered through a short column of silica gel (hexane:EtOAc = 10:1) to give the corresponding bezylate as a colorless oil, which was used without further purification. To a suspension of lithium aluminum hydride (8.56 g, 226 mmol) in THF (200 mL) was added the benzylate in THF (100 mL) at –10 ˚C slowly. After stirred at this temperature for 2 h, the reaction mixture was quenched with MeOH and then added aqueous Rochelle salt and diethyl ether. The mixture was warmed to room temperature and stirred vigorously for 5 h. The organic layer was separated, and the aqueous layer was extracted with diethyl ether. The combined organic layer was washed with brine, dried over Na2SO4, and evaporated. The resulting residue was filtered through a column of silica gel (hexane:EtOAc = 3:1) to give the corresponding alcohol as a colorless oil, which was used without further purification. To a solution of the alcohol in dichloromethane (200 mL) was added 1,4-diazabicyclo[2.2.2]octane (26.8 g, 239 mmol) and TsCl (33.7 g, 177 mmol). After stirred at room temperature for 1.5 h, the reaction mixture was poured into saturated NaHCO3 and then extracted with diethyl ether. The combined organic layer was washed with brine, dried over Na2SO4, and evaporated. The resulting residue was purified by silica gel column chromatography (hexane:EtOAc = 6:1) to give the tosylate (9) (27.4 g, 3 steps 91%) as a colorless oil (Found: C, 64.89; H 6.47. C18H22O4S requires C, 64.64; H, 6.63%); []D25.5 –4.74 (*c* 1.50 in CHCl3); max(film)/cm–1 1598, 1362, 1176, 1095, 973, 812, 666; H (400 MHz, CDCl3) 7.78 (2 H, d, *J* 8.3 Hz), 7.35-7.20 (7 H, m), 4.39 (2 H, s), 4.05 (1 H, dd, *J* 9.5, 5.6 Hz), 3.98 (1 H, dd, *J* 9.5, 5.8 Hz), 3.55 (1 H, dd, *J* 9.3, 5.4 Hz), 3.52 (1 H, dd, *J* 9.3, 6.8 Hz), 2.41 (3 H, s), 2.17-2.05 (1 H, m), 0.94 (3 H, d, *J* 7.1 Hz); C (100 MHz, CDCl3) 144.6, 138.1, 132.9, 129.7, 128.2, 127.8, 127.5, 127.3, 72.9, 72.1, 71.0, 33.6, 21.5, 13.5; *m/z* (ESI) 335 [M+H]+.

# (2*S*)-2-Methyl-1-dodecanol 10

# To a suspension of CuI (41.7 g, 219 mmol) in diethyl ether (100 mL) was added nonyl lithium (93.4 mL, 93.4 mmol, 1.0 M in diethyl ether) at –23 ˚C slowly. After stirred at this temperature for 10 min, the reaction mixture was cooled to –78 ˚C. The tosylate (9) (29.3 g, 87.5 mmol) in diethyl ether (100 mL) was added, and the mixture was stirred at –23 ˚C for 30 min. The reaction mixture was quenched with NH4Cl and then diethyl ether was added. The organic layer was separated, and the aqueous layer was extracted with diethyl ether. The combined organic layer was washed with brine, dried over Na2SO4, and evaporated. The resulting residue was filtered through a short column of silica gel (hexane:EtOAc = 30:1) to give the corresponding adduct as a colorless oil, which was used without further purification. To a solution of the adduct in Dichloromethane (300 mL) was added BCl3 (100 mL, 100 mmol, 1.0 M in heptane) at –78 ˚C. After stirred at 0 ˚C for 30 min, the reaction mixture was quenched with MeOH and saturated NaHCO3, and diethyl ether was added. The organic layer was separated, and the aqueous layer was extracted with diethyl ether. The combined organic layer was washed with brine, dried over Na2SO4, and evaporated. The resulting residue was purified by silica gel column chromatography (hexane:EtOAc = 10:1) to give the alcohol (10) (14.7 g, 2 steps 84%) as a colorless oil (Found: C, 77.69; H 14.03. C13H28O requires C, 77.93; H, 14.09%); []D26 –10 (*c* 0.50 in EtOH); max(film)/cm–1 3360, 2920; H (400 MHz, CDCl3) 3.51 (1 H, dd, *J* 10.5, 5.9 Hz), 3.41 (1 H, dd, *J* 10.5, 6.6 Hz), 1.64-1.53 (1 H, m), 1.47 (1 H, br s), 1.40-1.05 (18 H, m), 0.91 (3 H, d, *J* 6.6 Hz), 0.88 (3 H, t, *J* 6.8 Hz); C (100 MHz, CDCl3) 68.4, 35.7, 33.1, 31.9, 29.9, 29.7, 29.6, 29.3, 27.0, 22.7, 16.6, 14.1; *m/z* (EI) 199 [M]+.

# (2*E*,4*R*,5*R*,6*E*)-2,4,6-Trimethyl-5-(triphenylsiloxy)-7-iodo-2,6-heptadiene-1-ol 11

# To a solution of the ester (4) (9.00 g, 15.1 mmol) in Dichloromethane (60 mL) at –78 ˚C was added diisobutylaluminum hydride (40.5 mL, 37.7 mmol, 0.93 M in hexane) dropwise. After stirred at this temperature for 30 min, the reaction mixture was quenched with MeOH and then aqueous Rochelle salt and EtOAc was added. The mixture was warmed to room temperature and stirred vigorously for 5 h. The organic layer was separated, and the aqueous layer was extracted with EtOAc. The combined organic layer was washed with brine, dried over Na2SO4, and evaporated. The resulting residue was purified by silica gel column chromatography (hexane:EtOAc = 6:1) to give the alcohol (11) (8.06 g, 99%) as a colorless oil (Found: C, 60.60; H 5.67. C28H31IO2Si requires C, 60.65; H, 5.63%); []D26.6 +33.8 (*c* 0.895 in CHCl3); max(film)/cm–1 3367, 3062, 2965, 1428; H (400 MHz, CDCl3) 7.54 (6 H, dt, *J* 8.0, 1.5 Hz), 7.42 (3 H, tt, *J* 7.4, 1.5 Hz), 7.36 (6 H, dd, *J* 8.0, 7.4 Hz), 5.86 (1 H, s), 5.03 (1 H, dq, *J* 9.8, 1.0 Hz), 4.04 (1 H, d, *J* 8.0 Hz), 3.82 (3 H, d, *J* 1.0 Hz), 1.66 (3 H, d, *J* 1.0 Hz), 0.71 (3 H, d, *J* 6.8 Hz); C (100 MHz, CDCl3) 148.1, 135.5, 135.3, 134.1, 130.0, 128.8, 127.7, 82.8, 80.5, 68.6, 37.0, 19.5, 16.9, 14.0; *m*/*z* (ESI) 577 [M+Na]+.

# (2*E*,4*R*,5*R*,6*E*)-2,4,6-Trimethyl-5-(triphenylsiloxy)-7-iodo-2,6-heptadienoic acid 12

# To a suspension of manganese dioxide (2.24 g, 25.8 mmol) in dichloromethane (13 mL) was added a solution of the alcohol (11) (1.39 g, 2.58 mmol) in dichloromethane (5 mL) at room temperature. After stirred at this temperature for 12 h, the reaction mixture was filtered through Celite and evaporated to give the crude aldehyde, which was used without further purification. To a solution of the crude aldehyde in *tert*-butyl alcohol (30 mL) and 2-methyl-2-butene (18 mL) was added a mixture of sodium chlorite (5.16 g) and sodium dihydrogenphosphate (5.16 g) in water (30 mL). After stirred for 20 h at room temperature, the reaction mixture was diluted with EtOAc and 0.5 M KHSO4. The organic layer was separated, and the aqueous layer was extracted with EtOAc. The combined organic layer was washed with 10% NaHSO3 and brine, dried over Na2SO4, and evaporated. The resulting residue was purified by silica gel column chromatography (hexane:EtOAc = 5:1) to give the acid (12) (1.27 g, 87%) as a colorless oil (Found: C, 58.92; H 5.32. C28H29IO3Si requires C, 59.15; H, 5.14%); []D23.5 +38.8 (*c* 1.37 in CHCl3); max(film)/cm–1 3441, 2972, 1683, 1645, 1426, 1271, 1068, 746, 706; H (400 MHz, CDCl3) 7.57 (6 H, dd, *J* 7.8, 1.2 Hz), 7.40-7.25 (9 H, m), 7.23 (2 H, d, *J* 8.6 Hz), 6.84 (2 H, d, *J* 8.6 Hz), 6.62 (1 H, dd, *J* 10.0, 1.3 Hz), 5.50 (1 H, s), 5.17 (1 H, d, *J* 9.8 Hz), 4.46 (1 H, d, *J* 10.7 Hz), 4.43 (1 H, d, *J* 10.7 Hz), 4.12 (2 H, q, *J* 7.2 Hz), 3.91 (1 H, d, *J* 6.6 Hz), 3.78 (3 H, s), 3.04 (1 H, dd, *J* 5.4, 5.1 Hz), 2.93-2.81 (1 H, m), 2.75-2.64 (1 H, m), 1.88 (3 H, d, *J* 1.3 Hz), 1.68 (3 H, s), 1.55 (3 H, s), 1.42-1.17 (19 H, m), 1.22 (3 H, t, *J* 7.2 Hz), 0.98 (3 H, d, *J* 6.6 Hz), 0.94 (3 H, d, *J* 6.8 Hz), 0.88 (3 H, t, *J* 6.7 Hz), 0.78 (3 H, d, *J* 6.8 Hz); C (100 MHz, CDCl3) 168.1, 158.8, 145.9, 135.6, 134.5, 133.8, 133.7, 133.2, 131.6, 131.1, 129.7, 128.9, 127.7, 127.5, 113.5, 87.2, 84.6, 74.4, 60.3, 55.2, 38.2, 36.1, 35.7, 34.2, 31.9, 30.0, 29.7, 29.7, 29.6, 29.3, 27.3, 22.7, 18.4, 16.8, 16.4, 14.7, 14.2, 14.1, 13.1, 12.8; HRMS (ESI) calcd. for C28H33NO3SiI (M+NH4)+ 586.1274, found 586.1273.

# (1*R*,2*S*,3*R*)-1-[(4-Methoxybenzyloxy)methyl]-2,3-bis(4-methoxybenzyloxy)-4-(*tert*-butyldimethylsiloxy)butyl (2*E*,4*R*,5*R*,6*E*)-2,4,6-trimethyl-5-(triphenylsiloxy)-7-iodo-2,6-heptadienoate 13

# To a solution of the acid (12) (1.90 g, 3.35 mmol) and the alcohol (5) (2.93 g, 4.68 mmol) in dichloromethane (35 mL) was added *N,N*-dimethylaminopyridine (1.23 g, 10.1 mmol), *N,N*-dimethylaminopyridine hydrogenchloride (1.06 g, 6.68 mmol), and dicyclohexylcarbodiimide (1.38 g, 6.69 mmol). The reaction mixture was heated at reflux for 6 h. After cooled to room temperature, the reaction mixture was diluted with EtOAc. The organic layer was washed with 0.5 M KHSO4, saturated NaHCO3 and brine, dried over Na2SO4, and evaporated. The resulting residue was purified by silica gel column chromatography (hexane:EtOAc = 4:1) to give the adduct (13) (3.10 g, 79%) as a colorless oil (Found: C, 64.56; H 6.63. C63H77IO10Si2 requires C, 64.27; H, 6.59%); []D23.1 +20.3 (c 0.995 in CHCl3); max(film)/cm–1 1711, 1613, 1510, 1251, 1088, 837, 707; H (300 MHz, CDCl3) 7.62-7.53 (6 H, m), 7.45-7.31 (9 H, m), 7.22 (2 H, d, *J* 8.6 Hz), 7.18 (2 H, d, *J* 8.6 Hz), 7.13 (2 H, d, *J* 8.6 Hz), 6.82 (2 H, d, *J* 8.6 Hz), 6.79 (4 H, d, *J* 8.6 Hz), 6.73 (1 H, d, *J* 10.1 Hz), 5.93 (1 H, s), 5.33 (1 H, m), 4.55 (2 H, d, *J* 11.0 Hz), 4.46 (2 H, d, *J* 11.0 Hz), 4.45 (1 H, d, *J* 11.7 Hz), 4.34 (1 H, d, *J* 11.7 Hz), 4.20 (1 H, d, *J* 6.8 Hz), 3.94-3.73 (3 H, m), 3.78 (3 H, s), 3.78 (3 H, s), 3.75 (3 H, s), 3.73-3.57 (3 H, m), 2.88-2.78 (1 H, m), 1.85 (3 H, s), 1.66 (3 H, s), 0.89 (9 H, s), 0.86 (3 H, d, *J* 6.8 Hz), 0.02 (6 H, s); C (75 MHz, CDCl3) 167.2, 159.1, 159.1, 159.0, 147.4, 144.6, 135.5, 133.7, 130.7, 130.5, 130.4, 130.0, 129.8, 129.1, 129.1, 128.4, 127.8, 113.6, 113.6, 113.6, 81.8, 81.1, 79.6, 77.7, 74.0, 73.4, 73.3, 72.7, 68.3, 63.0, 55.2, 55.2, 55.2, 38.5, 25.9, 20.1, 18.2, 16.2, 12.9, –5.4, –5.4; HRMS (ESI) calcd. for C63H81NO10Si2I (M+NH4)+ 1194.4444, found 1194.4437.

# (1*R*,2*S*,3*R*)-1-[(4-Methoxybenzyloxy)methyl]-2,3-bis(4-methoxybenzyloxy)-4-(*tert*-butyldimethylsiloxy)butyl (2*E*,4*R*,5*R*,6*E*,8*E*,10*S*,11*R*,12*S*)-2,4,6,8,10,12-hexamethyl-5-(triphenylsiloxy)-11-(4-methoxybenzyloxy)-2,6,8-docosatrienoate 2

# To a solution of alkyne (3) (1.09 g, 2.82 mmol) in THF (12 mL) was added 9-BBN (12.0 mL, 6.00 mmol, 0.5 M in THF) at 0 ˚C. After stirring at room temperature for 12 h, a solution of iodide (13) (2.76 g, 2.34 mmol) in THF (12 mL), H2O (12 mL), K3PO4 (2.50 g, 11.8 mmol), and PdCl2(dppf) (384 mg, 0.470 mmol) were added and the reaction mixture was stirred at 65 ˚C for 30 min. The reaction mixture was cooled to room temperature, diluted with EtOAc, and filtered through Celite. The filtrate was washed with saturated Na2HCO3, H2O, and brine, dried over Na2SO4, and evaporated. The resulting residue was purified by silica gel column chromatography (hexane:EtOAc = 6:1) to give the adduct (2) (2.92 g, 84%) as a colorless oil; []D26.0 –8.17 (c 0.655 in CHCl3); max(film)/cm–1 1710, 1615, 1510, 1462, 1249, 1088; H (400 MHz, CDCl3) 7.56 (6 H, dd, *J* 7.8, 1.4 Hz), 7.38-7.23 (9 H, m), 7.22 (2 H, d, *J* 8.5 Hz), 7.21 (2 H, d, *J* 8.5 Hz), 7.16 (2 H, d, *J* 8.8 Hz), 7.10 (2 H, d, *J* 8.8 Hz), 6.84 (2 H, d, *J* 8.8 Hz), 6.80 (2 H, d, *J* 8.8 Hz), 6.77 (2 H, d, *J* 8.5 Hz), 6.77 (2 H, d, *J* 8.5 Hz), 6.75 (1 H, m), 5.52 (1 H, s), 5.31 (1 H, m), 5.14 (1 H, d, *J* 9.6 Hz), 4.56-4.38 (7 H, m), 4.32 (1 H, d, *J* 11.7 Hz), 3.98 (1 H, d, *J* 8.1 Hz), 3.90 (1 H, dd, *J* 5.4, 3.4 Hz), 3.85 (1 H, dd, *J* 11.3, 3.2 Hz), 3.81-3.75 (1 H, m), 3.78 (3 H, s), 3.76 (3 H, s), 3.76 (3 H, s), 3.73 (3 H, s), 3.68-3.56 (3 H, m), 3.03 (1 H, t, *J* 5.3 Hz), 2.93-2.82 (1 H, m), 2.74-2.62 (1 H, m), 1.90 (3 H, s), 1.64 (3 H, s), 1.54 (3 H, s), 1.41-1.20 (19 H, m), 0.96 (3 H, d, *J* 6.8 Hz), 0.93 (3 H, d, *J* 6.8 Hz), 0.88 (9 H, s), 0.82 (3 H, t, *J* 6.8 Hz), 0.81 (3H , d, *J* 6.8 Hz), 0.00 (6 H, s); C (100 MHz, CDCl3) 167.4, 159.1, 159.1, 159.0, 158.8, 146,6, 144.6, 135.6, 134.4, 133.8, 133.2, 131.6, 131.1, 130.8, 130.6, 130.4, 129.8, 129.8, 129.7, 129.1, 128.9, 127.7, 127.6, 113.6, 113.6, 113.6, 113.5, 87.1, 84.3, 79.7, 77.7, 74.4, 74.0, 73.4, 72.6, 68.4, 63.2, 55.2, 55.2, 55.2, 55.1, 38.5, 36.0, 35.7, 34.2, 31.9, 30.0, 29.7, 29.7, 29.6, 29.3, 27.3, 25.9, 22.7, 18.3, 18.3, 16.8, 16.5, 14.7, 14.1, 13.2, 13.0, –5.4, –5.5; *m/z* (ESI) 1459 (M+Na)+.

# Ethyl (2*E*,4*R*,5*R*,6*E*,8*E*,10*S*,11*R*,12*S*)-2,4,6,8,10,12-hexamethyl-5-(triphenylsiloxy)-11-(4-methoxybenzyloxy)-2,6,8-docosatrienoate 14

# To a solution of alkyne (3) (3.49 g, 9.04 mmol) in THF (36 mL) was added 9-BBN (36.0 mL, 18.0 mmol, 0.5 M in THF) at 0 ˚C. After stirring at room temperature for 12 h, a solution of iodide (4) (4.50 g, 7.54 mmol) in DMF (36 mL), H2O (36 mL), K3PO4 (7.64 g, 36.0 mmol), and PdCl2(dppf) (1.23 g, 1.51 mmol) were added and the mixture was stirred at 65 ˚C for 30 min. The reaction mixture was cooled to room temperature, diluted with EtOAc, and filtered through Celite. The filtrate was washed with saturated NaHCO3, H2O, and brine, dried over Na2SO4, and evaporated. The resulting residue was purified by silica gel column chromatography (hexane:EtOAc = 7:1) to give the adduct (14) (5.66g, 88%) as a colorless oil; []D23.2 –12.4 (*c* 0.605 in CHCl3); max(film)/cm–1 1710, 1516, 1459, 1247, 1113, 706; H (400 MHz, CDCl3) 7.57 (6 H, dd, *J* 7.8, 1.2 Hz), 7.40-7.25 (9 H, m), 7.23 (2 H, d, *J* 8.6 Hz), 6.84 (2 H, d, *J* 8.6 Hz), 6.62 (1 H, dd, *J* 10.0, 1.3 Hz), 5.50 (1 H, s), 5.17 (1 H, d, *J* 9.8 Hz), 4.46 (1 H, d, *J* 10.7 Hz), 4.43 (1 H, d, *J* 10.7 Hz), 4.12 (2 H, q, *J* 7.2 Hz), 3.91 (1 H, d, *J* 6.6 Hz), 3.78 (3 H, s), 3.04 (1 H, dd, *J* 5.4, 5.1 Hz), 2.93-2.81 (1 H, m), 2.75-2.64 (1 H, m), 1.88 (3 H, d, *J* 1.3 Hz), 1.68 (3 H, s), 1.55 (3 H, s), 1.42-1.17 (19 H, m), 1.22 (3 H, t, *J* 7.2 Hz), 0.98 (3 H, d, *J* 6.6 Hz), 0.94 (3 H, d, *J* 6.8 Hz), 0.88 (3 H, t, *J* 6.7 Hz), 0.78 (3 H, d, *J* 6.8 Hz); C (100 MHz, CDCl3) 168.1, 158.8, 145.9, 135.6, 134.5, 133.8, 133.7, 133.2, 131.6, 131.1, 129.7, 128.9, 127.7, 127.5, 113.5, 87.2, 84.6, 74.4, 60.3, 55.2, 38.2, 36.1, 35.7, 34.2, 31.9, 30.0. 29.7, 29.7, 29.6, 29.3, 27.3, 22.7, 18.4, 16.8, 16.4, 14.7, 14.2, 14.1, 13.1, 12.8; HRMS (ESI) calcd. for C56H80NO5Si (M+NH4)+ 874.5806, found 874.5797.

# (1*R*,2*S*,3*R*)-1-[(4-Methoxybenzyloxy)methyl]-2,3-bis(4-methoxybenzyloxy)-4-

# hydroxybutyl (2*E*,4*R*,5*R*,6*E*,8*E*,10*S*,11*R*,12*S*)-2,4,6,8,10,12-hexamethyl-5-hydroxy-11-(4-methoxybenzyloxy)-2,6,8-docosatrienoate 15

# To a solution of the adduct (2) (2.95 g, 2.03 mmol) in THF (70 mL) was added a 1 M aqueous HCl solution (20 mL) at room temperature. After stirred at this temperature for 2 days, the reaction mixture was quenched with saturated NaHCO3, and extracted with EtOAc. The combined organic layer was washed with brine, dried over Na2SO4, and evaporated. The resulting residue was purified by silica gel column chromatography (hexane:EtOAc = 2:1) to give the diol (15) (1.82 g, 84%) as a colorless oil. The physical data of the diol (15) was completely consistent with those of the authentic sample.4

# (2*S*,3*S*,4*R*)-2,3,5-Tris(4-Methoxybenzyloxy)-4-[[(2*E*,4*R*,6*E*,8*E*,10*S*,11*R*,12*S*)-1,5-dioxo-2,4,6,8,10,12-hexamethyl-11-(4-methoxybenzyloxy)-2,6,8-docosatrienyl]oxy]pentanoic acid 16

# To a solution of the diol (15) (1.58 g, 1.48 mmol) and pyridine (0.60 mL, 7.42 mmol) in dichloromethane (20 mL) was added Dess–Martin periodinane (2.51 g, 5.92 mmol) at 0 ˚C. After stirred at room temperature for 2.5 h, the reaction mixture was diluted with EtOAc. The organic layer was washed with saturated NaHCO3, 10% NaHSO3, and brine, dried over Na2SO4, and evaporated. The residue was filtered through a short column of silica gel (hexane:EtOAc = 3:1) to give the ketoaldehyde as a colorless oil, which was used without further purification. To a solution of the ketoaldehyde in *tert*-butyl alcohol (18 mL) and 2-methyl-2-butene (11 mL) was added a mixture of sodium chlorite (2.96 g) and sodium dihydrogenphosphate (2.96 g) in water (18 mL). After stirred for 20 h at room temperature, the reaction mixture was diluted with EtOAc and 0.5 M KHSO4. The organic layer was separated, and the aqueous layer was extracted with EtOAc. The combined organic layer was washed with 10% NaHSO3 and brine, dried over Na2SO4, and evaporated. The resulting residue was purified by silica gel column chromatography (hexane:acetone = 2:1) to give the ketoacid (16) (847 mg, 2 steps 55%) as a colorless oil. The physical data of the ketoacid (16) was completely consistent with those of the authentic sample.3

# Khafrefungin (1)

# To a solution of the ketoacid (16) (305 mg, 0.283 mmol) in dichloromethane (24 mL) was added BCl3 (1.41 mL, 1.41 mmol, 1.0 M in heptane) at –78 ˚C. After stirred at this temperature for 5 min, the reaction mixture was quenched with saturated NaHCO3 and poured into aqueous citric acid and EtOAc. The organic layer was separated, and the aqueous layer was extracted with EtOAc. The combined organic layer was washed with brine, dried over Na2SO4, and evaporated. The resulting residue was purified by silica gel column chromatography (CHCl3:MeOH:H2O = 10:1:0 to 4:1:0.1) and then freeze-dried by benzene to give khafrefungin (1) (86.1 mg, 51%) as a colorless amorphous powder. The physical data of the synthetic khafrefungin (1) was completely consistent with those of the authentic sample.3

#

# Synthesis of derivative 17

# Ethyl 1,3-dimethyl-2-oxo-4-iodo-3-cyclopentene-1-carbonate 38

# To a solution of iodide (37) (3.00 g, 13.5 mmol) in toluene (60 mL) at –78 ˚C was added KHMDS (59.5 mL, 29.8 mmol, 0.5 M in toluene), followed by ethyl formate (1.55 mL, 16.2 mmol). After stirring at this temperature for 30 min, methyl iodide (8.4 mL, 135 mmol) was added and the mixture was stirred at room temperature for 12 h. To the reaction mixture was added saturated NaHCO3 and extracted with EtOAc. The organic layer was washed with brine, dried over Na2SO4, and evaporated. The resulting residue was purified by silica gel column chromatography (hexane:diethyl ether = 3:1) to give the corresponding ester (38) (2.71 g, 65%) as a colorless solid (Found: C, 38.72; H 4.32. C10H13IO3 requires C, 38.98; H, 4.25%); H (300 MHz, CDCl3) 4.15 (2 H, q, *J* 7.1 Hz), 3.51 (1 H, dq, *J* 18.1, 2.2 Hz), 3.83 (1 H, dq, *J* 18.1, 2.2 Hz), 1.84 (3 H, t, *J* 2.2 Hz), 1.42 (3 H, s), 1.23 (3 H, t, *J* 7.1 Hz); C (75 MHz, CDCl3) 199.7, 170.8, 145.1, 132.3, 61.7, 56.1, 52.4, 20.5, 14.0, 13.3.

# Ethyl (2*E*)-2-methyl-3-[1,3-dimethyl-2-(triphenylsiloxy)-4-iodo-3-cyclopentenyl]

# propenoate 39

# To a solution of the ester (38) (2.65 g, 8.60 mmol) in MeOH (40 mL) was added NaBH4 (976 mg, 25.8 mmol) at 0 ˚C. After stirred at this temperature for 20 min, the reaction mixture was quenched with saturated NH4Cl and extracted with EtOAc. The organic layer was washed with brine, dried over Na2SO4, and evaporated. The resulting residue was purified by silica gel column chromatography (hexane:EtOAc = 5:1) to give the corresponding alcohol (1.87 g, 70%) as a colorless oil (diastereoisomer = 13:1 by 1H NMR analysis) (Found: C, 38.66; H 4.82. C10H13IO3 requires C, 38.73; H, 4.88%); H (400 MHz, CDCl3) 4.77 (1 H, s), 4.18 (2 H, q, *J* 7.2 Hz), 3.11 (1 H, dq, *J* 16.0, 2.4 Hz), 2.57 (1 H, dq, *J* 16.0, 2.2 Hz), 2.18 (1 H, br s), 1.80 (3 H, dd, *J* 2.4, 2.2 Hz), 1.28 (3 H, s), 1.27 (3 H, t, *J* 7.2 Hz); C (100 MHz, CDCl3) 176.4, 144.4, 92.4, 80.5, 61.0, 53.3, 52.2, 19.1, 16.2, 14.2.

# To a solution of the alcohol (1.70 g, 5.48 mmol) in DMF (10 mL) was added imidazole (1.12 g, 16.5 mmol) followed by chlorotriphenylsilane (2.26 g, 7.66 mmol) at 0 ˚C. After stirred at room temperature for 2 h, the reaction mixture was poured into cooled saturated NaHCO3 and extracted with diethyl ether. The organic layer was washed with brine, dried over Na2SO4, and evaporated. The resulting residue was purified by silica gel column chromatography (hexane:EtOAc = 50:1) to give the corresponding TPS ether (3.35 g, quant.) as a colorless oil.

# To a solution of the TPS ether (1.00 g, 1.76 mmol) in dichloromethane (9.0 mL) at –78 ˚C was added diisobutylaluminum hydride (4.45 mL, 4.23 mmol, 0.95 M in hexane) dropwise. After stirred at this temperature for 30 min, the reaction mixture was quenched with MeOH and then added aqueous Rochelle salt and EtOAc was added. The mixture was warmed to room temperature and stirred vigorously for 5 h. The organic layer was separated, and the aqueous layer was extracted with EtOAc. The combined organic layer was washed with brine, dried over Na2SO4, and evaporated. The resulting residue was filtered through a short column of silica gel (hexane:EtOAc = 9:1) to give the corresponding alcohol as a colorless oil, which was used without further purification. To a solution of oxalyl chloride (0.24 mL, 2.80 mmol) in dichloromethane (8.0 mL) was added DMSO (0.40 mL, 5.63 mmol) at –78 ˚C. The reaction mixture was stirred for 10 min, and then a solution of the alcohol in dichloromethane (3.0 mL) was added. After the reaction mixture was stirred at this temperature for 1 h, triethylamine (1.56 mL, 11.3 mmol) was added. The mixture was warmed to 0 ˚C and further stirred for 1 h. The reaction was quenched with saturated NH4Cl and extracted with EtOAc. The combined organic layer was washed with brine and dried over Na2SO4 and evaporated to give the crude aldehyde as a colorless oil, which was used without further purification. To a solution of (carbethoxyethylidene)triphenylphosphorane (3.25 g, 8.97 mmol) was added the crude aldehyde in toluene (9.0 mL) at room temperature and the reaction mixture was stirred at reflux for 3 days. The cooled reaction mixture was added saturated NaHCO3 and extracted with EtOAc. The organic layer was washed with brine, dried over Na2SO4, and evaporated. The resulting residue was purified by silica gel column chromatography (hexane:EtOAc = 40:1) to give the corresponding iodide (39) (1.02 g, 3 steps 93%) as a colorless oil. H (400 MHz, CDCl3) 7.63 (6 H, dd, *J* 6.6, 1.4 Hz), 7.43 (3 H tt, *J* 7.6, 6.6 Hz), 7.37 (6 H, dd, *J* 7.6, 6.6 Hz), 6.77 (1 H, s), 4.71 (1 H, s), 4.12 (2 H, q, *J* 7.2 Hz), 2.75 (2 H, m), 2.04 (3 H, s), 1.68 (3 H, s), 1.33 (3 H, s), 1.22 (3 H, t, *J* 7.2 Hz); C (100 MHz, CDCl3) 168.2, 148.2, 145.1, 135.7, 133.9, 133.3, 130.1, 128.5, 127.8, 85.3, 60.5, 55.5, 48.6, 22.4, 17.3, 14.2, 13.6; *m/z* (ESI) 631 (M+Na)+.

# (2*E*)-2-Methyl-3-[1,3-dimethyl-2-(triphenylsiloxy)-4-[(1*E*,3*S*,4*R*,5*S*)-1,3,5-

# trimethyl-4-(4-methoxybenzyloxy)-1-pentadecenyl]-3-cyclopentenyl]-2-propene-1-ol 40

# To a solution of the alkyne (3) (814 mg, 2.11 mmol) in THF (8.4 mL) was added 9-BBN (8.40 mL, 4.20 mmol, 0.5 M in THF) at 0 ˚C. After stirring at room temperature for 12 h, a solution of the iodide (39) (1.07 g, 1.76 mmol) in DMF (8.4 mL), H2O (8.4 mL), K3PO4 (1.87 g, 8.81 mmol), and PdCl2(dppf) (287 mg, 0.351 mmol) was added and stirred at 65 ˚C for 20 min. The reaction mixture was cooled to room temperature, diluted with EtOAc, and filtered through Celite. The filtrate was washed with saturated NaHCO3, H2O, and brine, dried over Na2SO4, and evaporated. The resulting residue was filtered through a short column of silica gel (hexane:EtOAc = 3:1) to give the corresponding adduct, which was used without further purification To a solution of the adduct in dichloromethane (12 mL) at –78 ˚C was added diisobutylaluminum hydride (5.68 mL, 5.28 mmol, 0.93 M in hexane) dropwise. After stirred at this temperature for 30 min, the reaction mixture was quenched with MeOH and then added aqueous Rochelle salt and EtOAc was added. The mixture was warmed to room temperature and stirred vigorously for 12 h. The organic layer was separated, and the aqueous layer was extracted with EtOAc. The combined organic layer was washed with brine, dried over Na2SO4, and evaporated. The resulting residue was purified by silica gel column chromatography (hexane:EtOAc = 4:1) to give the corresponding alcohol (40) (982 mg, 2 steps 67%) as a colorless oil. H (400 MHz, CDCl3) 7.73-7.63 (6 H, m), 7.47-7.33 (9 H m), 7.23 (2 H, d, *J* 8.3 Hz), 6.86-6.80 (2 H, m), 5,33 (1 H, m), 5,28 (1 H, m), 4.85 (1 H, s), 4.52 (1 H, d, *J* 10.7 Hz), 4.45 (1 H, d, *J* 10.7 Hz), 3.78 (3 H, s), 3.67 (2 H, br s), 3.08 (1 H, m), 2.75 (1 H, m), 2.55-2.31 (2 H, m), 1.73 (3 H, s), 1.69 (3 H, s), 1.54 (3 H, s), 1.43-1.15 (22 H, m), 1.01-0.96 (3 H, m), 0.96-0.91 (3 H, m), 0.91-0.85 (3 H, m).

# (1*R*,2*S*,3*R*)-1-[(4-Methoxybenzyloxy)methyl]-2,3-bis(4-methoxybenzyloxy)-4-(tert-butyldimethylsiloxy)butyl (2*E*)-2-methyl-3-[1,3-dimethyl-2-(triphenylsiloxy)-4-[(1*E*,3*S*,4*R*,5*S*)-1,3,5-trimethyl-4-(4-methoxybenzyloxy)-1-pentadecenyl]-3-cyclo-pentenyl]-2-propenoate 41

# To a solution of oxalyl chloride (0.150 mL, 1.75 mmol) in dichloromethane (9.0 mL) was added DMSO (0.250 mL, 3.52 mmol) at –78 ˚C slowly. The reaction mixture was stirred for 10 min, and then a solution of the alcohol (40) (740 mg, 0.895 mmol) in dichloromethane (3.0 mL) was added. After the reaction mixture was stirred at this temperature for 1 h, triethylamine (0.980 mL, 7.07 mmol) was added. The mixture was warmed to 0 ˚C and further stirred for 1 h. The reaction was quenched with saturated NH4Cl and extracted with EtOAc. The combined organic layer was washed with brine, dried over Na2SO4, and evaporated to give the crude aldehyde, which was used without further purification. To a solution of the crude aldehyde in *tert*-butyl alcohol (7.0 mL) and 2-methyl-2-butene (4.0 mL) was added a mixture of sodium chlorite (1.79 g) and sodium dihydrogenphosphate (1.79 g) in water (7.0 mL). After stirred for 12 h at room temperature, the reaction mixture was diluted with EtOAc and 0.5 M KHSO4. The organic layer was separated, and the aqueous layer was extracted with EtOAc. The combined organic layer was washed with 10% NaHSO3 and brine, dried over Na2SO4, and added a small amount of triethylamine, and evaporated to give the crude acid, which was used without further purification. To a solution of the crude acid and the alcohol (5) (672 mg, 1.07 mmol) in dichloromethane (5.0 mL) was added *N,N*-dimethylaminopyridine (547 mg, 4.48 mmol), 1-(3-dimethylaminopropyl)-3-ethylcarbodiimide hydrochloride (343 mg, 1.79 mmol). The reaction mixture was heated at reflux for 5 h. After cooled to room temperature, the reaction mixture was diluted with EtOAc. The organic layer was washed with 0.5 M KHSO4, saturated NaHCO3 and brine, dried over Na2SO4, and evaporated. The resulting residue was purified by silica gel column chromatography (hexane:EtOAc = 5:1 to 2:1) to give the corresponding adduct (41) (743 mg, 3 steps 57%) as a colorless oil (diastereomixture at C4 = 1:1 by H1 NMR analysis). H (400 MHz, CDCl3) 7.64 (6 H, d, *J* 7.6 Hz), 7.39-7.29 (9 H, m), 7.25 (1 H, d, *J* 8.8 Hz), 7.22 (1 H, d, *J* 8.8 Hz), 7.19 (2 H, d, *J* 8.8 Hz), 7.14 (1 H, d, *J* 8.6 Hz), 7.13 (1 H, d, *J* 8.6 Hz), 6.89 (1 H, s), 6.82 (2 H, m), 6.80 (4 H, d, *J* 8.6 Hz), 5.33 (1 H, d, *J* 9.5 Hz), 5.26 (1 H, m), 4.79 (0.5 H, s), 4.78 (0.5 H, s), 4.56-4.30 (8 H, m), 3.89-3.78 (2 H, m), 3.79-3.73 (12 H, m), 3.67-3.52 (4 H, m), 3.10-3.03 (1 H, m), 2.79-2.70 (1 H, m), 2.56-2.39 (2 H, m), 1.71 (1.5 H, s), 1.66 (1.5 H, s), 1.64 (1.5 H, s), 1.61 (1.5 H, s), 1.33-1.30 (22 H, m), 0.98 (3 H, d, *J* 6.6 Hz), 0.94 (1.5 H, d, *J* 6.8 Hz), 0.93 (1.5 H, d, *J* 6.8 Hz), 0.91-0.83 (12 H, m), 0.00 (3 H, s), –0.01 (3 H, s); *m/z* (ESI) 1471 (M+Na)+.

# (1*R*,2*S*,3*R*)-1-[(4-Methoxybenzyloxy)methyl]-2,3-bis(4-methoxybenzyloxy)-4-

# hydroxybutyl (2*E*)-2-methyl-3-[1,3-dimethyl-2-hydroxy-4-[(1*E*,3*S*,4*R*,5*S*)-1,3,5-

# trimethyl-4-(4-methoxybenzyloxy)-1-pentadecenyl]-3-cyclopentenyl]-2-propenoate 42

# To a solution of the adduct (41) (630 mg, 0.434 mmol) in THF (25 mL) was added acetic acid (0.37 mL, 6.52 mmol) and tetrabutylammonium fluoride (4.34 mL, 4.34 mmol, 1.0 M in THF) at room temperature. After stirred at 50 ˚C for 8 h, the reaction mixture was cooled to room temperature and added saturated NaHCO3. The mixture was extracted with EtOAc and the organic layer was washed with brine, dried over Na2SO4, and evaporated. The resulting residue was purified by silica gel column chromatography (hexane:EtOAc = 2:1) to give the corresponding diol (42) (434 mg, 93%) as a colorless oil. H (400 MHz, CDCl3) 7.23 (2 H, d, *J* 8.5 Hz), 7.22 (2 H, d, *J* 8.3 Hz), 7.19 (4 H, d, *J* 8.6 Hz), 7.05 (0.5 H, d, *J* 1.5 Hz), 7.04 (0.5 H, d, *J* 1.5 Hz), 6.86-6.80 (8 H, m), 5.37 (1 H, d, *J* 9.5 Hz), 5.23 (1 H, m), 4.63-4.39 (9 H, m), 3.91 (1 H, m), 3.86-3.57 (17 H, m), 3.09 (1 H, dd, *J* 5.1, 4.9 Hz), 2.82-2.73 (1 H, m), 2.63-2.37 (2 H, m), 1.90 (3 H, s), 1.76 (1.5 H, s), 1.75 (1.5 H, s), 1.75 (1.5 H, d, *J* 1.5 Hz), 1.72 (1.5 H, d, *J* 1.5 Hz), 1.32-1.18 (19 H, m), 1.15 (1.5 H, s), 1.15 (1.5 H, s), 1.01 (1.5 H, d, *J* 6.6 Hz), 0.99 (1.5 H, d, *J* 6.8 Hz), 0.94 (3 H, d, *J* 6.8 Hz), 0.88 (3 H, t, *J* 6.8 Hz); *m/z* (ESI) 1099 (M+Na)+.

# To a solution of the diol (390 mg, 0.362 mmol) and pyridine (0.18 mL, 2.18 mmol) in dichloromethane (10 mL) was added Dess–Martin periodinane (614 mg, 1.45 mmol) at 0 ˚C. After stirred at room temperature for 2.5 h, the reaction mixture was diluted with EtOAc. The organic layer was washed with saturated NaHCO3, 10% NaHSO3, and brine, dried over Na2SO4, and evaporated. The residue was filtered through a short column of silica gel (hexane:EtOAc = 3:1) to give the crude aldehyde as a colorless oil, which was used without further purification. To a solution of the crude aldehyde in *tert*-butyl alcohol (2.0 mL) and 2-methyl-2-butene (1.2 mL) was added a mixture of sodium chlorite (420 mg) and sodium dihydrogenphosphate (420 mg) in water (2.0 mL). After stirred for 20 h at room temperature, the reaction mixture was diluted with EtOAc and 0.5 M KHSO4. The organic layer was separated, and the aqueous layer was extracted with EtOAc. The combined organic layer was washed with 10% NaHSO3 and brine, dried over Na2SO4, and evaporated. The resulting residue was purified by silica gel column chromatography (chloroform:MeOH = 40:1 to 20:1) to give the corresponding acid (170 mg, 2 steps 44%) as a colorless oil. H (400 MHz, CDCl3) 7.26-7.10 (8 H, m), 6.96 (0.5 H, d, *J* 1.5 Hz), 6.93 (0.5 H, d, *J* 1.2 Hz), 6.86-6.74 (8 H, m), 5.89 (0.5 H, d, *J* 8.3 Hz), 5.87 (1 H, d, *J* 8.3 Hz), 5.23 (1 H, m), 4.68-4.40 (8 H, m), 4.48-4.20 (3 H, m), 4.02 (1 H, m), 3.79-3.73 (12 H, m), 3.16 (1 H, m), 2.93-2.78 (2 H, m), 2.72-2.57 (1 H, m), 1.92 (1.5 H, d, *J* 1.0 Hz), 1.90 (1.5 H, d, *J* 1.0 Hz), 1.87 (1.5 H, s), 1.86 (1.5 H, s), 1.71 (1.5 H, s), 1.64 (1.5 H, d, *J* 1.0 Hz), 1.33-1.20 (22 H, m), 1.06 (1.5 H, d, *J* 6.8 Hz), 1.05 (1.5 H, d, *J* 6.8 Hz), 0.97 (1.5 H, d, *J* 6.6 Hz), 0.96 (1.5 H, d, *J* 6.8 Hz), 0.88 (3 H, t, *J* 6.8 Hz); *m/z* (ESI) 1111 (M+Na)+.

# (2*S*,3*S*,4*R*)-2,3,5-Trihydroxy-4-[[(2*E*)-2-methyl-3-[1,3-dimethyl-2-oxo-4-[(1*E*,3*S*,4*R*,5*S*)-1,3,5-trimethyl-4-hydroxy-1-pentadecenyl]-3-cyclopentenyl]-2-propenoyloxy] pentanoic acid 17

# To a solution of the acid (44.0 mg, 0.040 mmol) in dichloromethane (3.5 mL) was added BCl3 (0.20 mL, 0.20 mmol, 1.0 M in heptane) at –78 ˚C. After stirred at this temperature for 5 min, the reaction mixture was quenched with saturated NaHCO3 and poured into aqueous citric acid and EtOAc was added. The organic layer was separated, and the aqueous layer was extracted with EtOAc. The combined organic layer was washed with brine, dried over Na2SO4, and evaporated. The resulting residue was purified by preparative thin layer chromatography on silica gel column (CHCl3:MeOH:H2O = 4:1:0.1) to give the derivative (17) (16.7 mg, 68%) as a colorless oil. H (300 MHz, CDCl3) 6.99 (1 H, s,), 5.92 (1 H, d, *J* 7.3 Hz), 4.97　(1　H, m), 4.25　(1　H,m), 4.14 (1 H, m), 3.91 (1 H, m), 3.84 (1 H, m), 3.75 (1 H, m), 2.94　(1　H, d, *J* 17.6 Hz), 2.85　(1 H, d, *J* 17.6 Hz), 2.82 (1 H, m), 1.97 (3 H, s), 1.87 (3 H, s), 1.77 (3 H, s), 1.54 (1 H, m), 1.47-1.12 (21 H, m), 1.04 (1.5 H, d, *J* 6.8 Hz), 1.03 (1.5 H, d, *J* 6.8 Hz), 0.93　(1.5　H, d, *J* 6.6 Hz), 0.92 (1.5 H, d, *J* 6.6 Hz), 0.90 (1.5 H, t, *J* 6.8 Hz), 0.89 (1.5 H, t, *J* 6.8 Hz); HRMS (ESI) calcd. for C34H55O9 (M-H)- 607.3846, found 607.3834.

# Synthesis of derivative 18

# 2,6-Dimethyl-3-iodo-6-(hydroxymethyl)-2-cyclohexene-1-one 44

# To a stirred solution of 35% formaline (3.32 g, 38.7 mmol) were added iodide 43 (9.69 g, 38.7 mmol) in dioxane (222 mL), and 0.5 N aq. NaOH (155 mL, 77.5 mmol) subsequently at room temperature. After stirred at room temperature for 30 min, the reaction mixture was neutralized by conc. HCl, and extracted with diethyl ether. The organic layer was washed with brine, dried over Na2SO4, and evaporated. The residue was purified by column chromatography on silica gel (hexane:EtOAc = 4:1) to give iodide 44 (6.74 g) as a pale yellow oil. H (500 MHz, CDCl3) 3.66 (1 H, d, *J* 11.3 Hz), 3.47 (1 H, d, *J* 11.2 Hz), 3.11 (2 H, m), 2.68 (1 H, br), 2.21 (1 H, dt, *J* 13.7, 8.2 Hz), 2.02 (3 H, s), 1.51 (1 H, dt, *J* 13.4, 4.3 Hz), 1.12 (3 H, s);C(125 MHz, CDCl3) 198.8, 140.3, 127.1, 68.4, 46.1, 39.1, 32.7, 21.8, 18.4; *m/z* (ESI) 303 (M+Na)+.

# (1*R*,2*S*,3*R*)-1-[(4-Methoxybenzyloxy)methyl]-2,3-bis(4-methoxybenzyloxy)-4-(*tert*-butyldimethylsiloxy)butyl (2*E*)-2-methyl-3-(1,3-dimethyl-2-oxo-4-iodo-3-cyclohexenyl)propenoate 45

# To a stirred solution of oxalyl chloride (5.29 g, 41.7 mmol) in dichloromethane (40 mL) was added a solution of dimethyl sulfoxide (4.87 g, 62.4 mmol) in dichloromethane (20 mL) at –78 °C. After stirring for 5 min at –78 °C, a solution of 44 (5.84 g, 20.8 mmol) in dichloromethane (40 mL) was added. After stirring for 1 h at –78 °C, a solution of the triethylamine (12.6 g, 12.5 mmol) in dichloromethane (20 mL) was added, and the mixture was warmed to room temperature. After stirred for 1 h at room temperature, the reaction was quenched with water, and the aqueous layer was extracted with diethyl ether. The extract was washed with water and brine, dried over Na2SO4, and evaporated. The residue was purified by column chromatography on silica gel (hexane:EtOAc = 5:1) to give the corresponding aldehyde (5.33 g, 92%) as a pale yellow oil.H (400 MHz, CDCl3) 9.57 (1 H, s), 3.20-3.00 (2 H, m), 2.31 (1 H, ddd, *J* 13.9, 6.6, 5.6 Hz), 2.05 (3 H, t, *J* 1.9 Hz), 1.83 (1 H, ddd, *J* 13.7, 7.3, 5.6 Hz), 1.30 (3 H, s);C (100 MHz, CDCl3) 199.8, 191.9, 141.1, 128.0, 57.3, 39.0, 30.8, 21.8, 18.2.

# To a solution of the aldehyde (0.50 g, 1.80 mmol) in toluene (5 mL) was added (carbethoxyethylidene)triphenylphosphorane (1.96 g, 5.41 mmol) at room temperature. After the solution was heated for 20 h at reflux, the solution was diluted with hexane. After the reaction mixture was filtered, the filtrate was evaporated. The residue was purified by column chromatography on silica gel (hexane:EtOAc = 8:1) to give the ester (0.63 g, 97%) as a pale yellow oil. H(400 MHz, CDCl3) 6.77 (1 H, s), 4.19 (2 H, q, *J* 7.1 Hz), 3.15-2.95 (2 H, m), 2.06 (3 H, s), 2.04 (1 H, d, *J* 5.0 Hz), 1.95 (1 H, ddd, *J* 13.9, 8.5, 5.2 Hz), 1.71 (3 H, s), 1.31 (3 H, s), 1.30 (3 H, t, *J* 7.0 Hz);C(100 MHz, CDCl3) 195.2, 168.0, 141.8, 140.8, 130.5, 124.8, 60.9, 46.9, 39.4, 37.8, 22.5, 22.4, 14.2, 13.3; *m/z* (ESI) 363 (M+H)+.

# To the ester (301 mg, 0.828 mmol) was added iodotrimethylsilane (0.118 mL, 0.829 mmol) at room temperature. After the mixture was heated for 5 h at reflux, the mixture was cooled to 0 °C and the reaction was quenched with NaHCO3. 10% aqueous citric acid was added and the mixture was extracted with EtOAc. The organic extract was washed with brine, dried over Na2SO4, and evaporated. The residue was purified by column chromatography on silica gel (chloroform:MeOH = 4:1 to 20:1) to give the carboxylic acid (149 g, 54%) as a violet oil. H (400 MHz, CDCl3) 6.90 (1 H, d, *J* 1.2 Hz), 3.01 (2 H, m), 2.04 (3 H, s), 2.03 (1 H, m), 1.95 (1 H, ddd, *J* 13.8, 8.3, 5.4 Hz), 1.70 (3 H, d, *J* 1.5 Hz), 1.30 (3 H, s);C (125 MHz, CDCl3) 195.0, 173.5, 144.5, 140.8, 129.7, 125.0, 47.1, 39.4, 37.7, 22.4, 22.3, 12.9.

# To a solution of the carboxylic acid (149 mg, 0.447 mmol) and alcohol 5 (339 mg, 0.541 mmol) in dichloromethane (3 mL) was added *N*,*N*-dimethylaminopyridine (73 mg, 2.24 mmol). To the stirred solution was added 1-(3-dimethylaminopropyl)-3-ethylcarbodiimide hydrochloride (EDCI•HCl, 172 mg, 0.897 mmol), and the mixture was heated for 5 h at reflux. After the mixture was cooled to room temperature, the reaction was quenched with an aqueous ammonium chloride solution. The mixture was extracted with EtOAc, and the organic layer was washed with saturated NaHCO3 solution and brine, dried over Na2SO4, and evaporated. The residue was purified by preparative thin layer chromatography on silica gel (hexane:EtOAc = 3:1) to give 45 (78 mg, 66%) as a colorless oil.H (400 MHz, CDCl3) 7.24-7.14 (6 H, m), 6.88-6.76 (7 H, m), 5.24 (1 H, m), 4.58-4.34 (6 H, m), 3.92 (1 H, dd, *J* 6.1, 3.2 Hz), 3.85-3.50 (5 H, m), 3.79 (3 H, s), 3.78 (3 H, s), 3.77 (3 H, s), 3.05-2.95 (2 H, m), 2.04 (3 H, s), 2.10-1.86 (2 H, m), 1.70 (3 H, d, *J* 3.6 Hz), 1.29 (3 H, s), 0.87 (4.5 H, s), 0.85 (4.5 H, s), 0.02 (3 H, s), 0.01 (3 H, s);C (100 MHz, CDCl3) 195.2, 195.1, 167.10, 167.07, 159.19, 159.19, 159.16, 159.13, 159.11, 159.09, 142.40, 142.20, 140.84, 140.79, 130.5, 130.4, 130.33, 130.28, 129.8, 129.74, 129.70, 129.2, 129.1, 124.8, 124.6, 113.7, 113.6, 79.5, 79.3, 74.1, 74.1, 73.53, 73.47, 73.3, 73.2, 72.65, 72.63, 68.1, 68.0, 62.6, 62.6, 55.22, 55.21, 47.01, 46.96, 39.48, 39.46, 37.9, 37.8, 25.90, 25.88, 22.5, 22.41, 22.40, 18.2, 18.1, 13.4, 13.3, –5.3, –5.4.

# (1*R*,2*S*,3*R*)-1-[(4-Methoxybenzyloxy)methyl]-2,3-bis(4-methoxybenzyloxy)-4-

# hydroxybutyl (2*E*)-2-methyl-3-[1,3-dimethyl-2-oxo-4-[(1*E*,3*S*,4*R*,5*S*)-1,3,5-

# trimethyl-4-(4-methoxybenzyloxy)-1-pentadecenyl]-3-cyclohexenyl]propenoate 46

# To a solution of alkyne 3 (73.9 mg, 0.191 mmol) in THF (1.24 mL) was added 9-BBN (0.76 mL, 0.382 mmol, 0.5 M in THF) at 0 ˚C. After stirring at room temperature for 24 h, a solution of iodide 45 (120 mg, 0.127 mmol) in DMF (0.77 mL), H2O (0.67 mL), K3PO4 (135 mg, 0.635 mmol), and PdCl2(dppf) (20.7 mg, 0.0253 mmol) were added and the reaction mixture was stirred at 50 ˚C for 1 h. The reaction mixture was cooled to room temperature, and it was quenched with saturated NaHCO3. The mixture was extracted with EtOAc, and the organic layer was washed with brine, dried over Na2SO4, and evaporated. The resulting residue was purified by preparative thin layer chromatography on silica gel (hexane:EtOAc = 3:1) to give the adduct as a colorless oil.

# The adduct (138 mg) was dissolved in THF (9.2 mL)/ 1 M aqueous HCl solution (4.6 mL). After stirring at room temperature for 4 h, THF (1.0 mL) was added. After the reaction mixture was stirred for 2 h, the reaction was quenched with saturated NaHCO3. The mixture was extracted with EtOAc and the combined organic layer was washed with brine, dried over Na2SO4, filtered, and evaporated. The resulting residue was purified by preparative thin layer chromatography on silica gel (hexane:EtOAc = 1:1) to give the alcohol 46 (61 mg, 44%, 2 steps) as a colorless oil. H (400 MHz, CDCl3) 7.26-7.16 (8 H, m), 6.90-6.80 (9 H, m), 5.30-5.24 (2 H, m), 4.63-4.38 (8 H, m), 3.90 (1 H, dd, *J* 8.3, 8.3 Hz), 3.87-3.80 (1 H, m), 3.784 (3 H, s), 3.781 (3 H, s), 3.775 (3 H, s), 3.772 (3 H, s), 3.78-3.74 (1 H, m), 3.73-3.55 (4 H, m) 3.08 (1 H, dd, *J* 12.0, 5.4 Hz), 2.78-2.66 (1 H, m), 2.50-2.20 (2 H, m), 2.10-1.98 (1 H, m), 1.98-1.83 (2 H, m), 1.78-1.73 (3 H, m), 1.729 (1.5 H, s), 1.722 (1.5 H, s), 1.707 (1.5 H, s), 1.704 (1.5 H, s), 1.69-1.57 (2 H, m), 1.58-1.48 (1 H, m), 1.31 (1.5 H, s), 1.30 (1.5 H, s), 1.26 (18 H, m), 1.02 (1.5 H, d, *J* 6.8 Hz), 1.01 (1.5 H, d, *J* 6.6 Hz), 0.952 (1.5 H, d, *J* 6.8 Hz), 0.947 (1.5 H, d, *J* 6.6 Hz), 0.88 (3 H, t, *J* 6.8 Hz);C (100 MHz, CDCl3) 201.5, 201.4, 167.6, 167.6, 159.3, 159.23, 159.16, 159.00, 158.96, 145.1, 144.8, 134.3, 134.0, 131.5, 131.32, 131.27, 131.26, 130.27, 130.25, 130.1, 130.1, 129.8, 129.7, 129.60, 129.58, 129.3, 129.2, 128.91, 128.89, 128.58, 128.56, 113.7, 113.6, 87.13, 87.10, 79.1, 79.0, 78.33, 78.27, 74.5, 74.4, 73.9, 73.9, 73.5, 73.4, 72.7, 67.9, 61.83, 61.78, 55.2, 46.2, 46.1, 36.4, 36.3, 35.54, 35.47, 35.3, 34.7, 33.9, 31.9, 30.0, 29.64, 29.60, 29.3, 27.5, 27.4, 27.30, 27.28, 27.2, 23.1, 23.0, 22.7, 18.4, 18.3, 15.4, 15.3, 15.0, 14.1, 13.7, 13.6, 13.02, 12.99.

# (2*S*,3*S*,4*R*)-2,3,5-Trihydroxy-4-[[(2*E*)-2-methyl-3-[1,3-dimethyl-2-oxo-4-[(1*E*,3*S*,4*R*,5*S*)-1,3,5-trimethyl-4-hydroxy-1-pentadecenyl]-3-cyclohexenyl]-2-propenoyloxy] pentanoic acid 18

# To a solution of the alcohol 46 (56.2 mg, 0.0516 mmol) in dichloromethane (5.0 mL) was added Dess–Martin periodinane (43.3 mg, 0.102 mmol) and pyridine (12.9 mg, 0.163 mmol) in dichloromethane (5.0 mL) at 0 ˚C. After stirred at room temperature for 1.5 h, the reaction mixture was diluted with dichloromethane. Saturated NaHCO3 was added to the reaction mixture, and the organic layer was separated. The aqueous layer was extracted with dichloromethane. The organic layer was washed with 1 N Na2S2O3, and brine, dried over Na2SO4 and evaporated. The resulting residue was purified by preparative thin layer chromatography on silica gel (hexane:EtOAc = 1:1) to give the aldehyde (50.3 mg, 90%) as a colorless oil.

# To a solution of the aldehyde (50. 3 mg, 0.0463 mmol) in *tert*-butyl alcohol (0.45 mL) and 2-methyl-2-butene (0.28 mL) was added a mixture of sodium chlorite (93.2 mg) and sodium dihydrogenphosphate (92.9 mg) in water (0.45 mL). After stirred for 1.5 h at room temperature, the reaction mixture was diluted with EtOAc and NaHCO3. The organic layer was separated, and the aqueous layer was extracted with EtOAc. The combined organic layer was washed with 10% NaHSO3 and brine, dried over Na2SO4, and evaporated. The resulting residue was purified by preparative thin layer chromatography on silica gel (CHCl3:MeOH = 10:1) to give the carboxylic acid (43.2 mg, 85%) as a colorless oil.

# To a solution of the carboxylic acid (21.1 mg, 0.0191 mmol) in dichloromethane (1.0 mL) was added BCl3 (0.096 mL, 0.096 mmol, 1.0 M in heptane) at –78 ˚C. After stirred at this temperature for 5 min, the reaction mixture was quenched with saturated NaHCO3, and aqueous citric acid and EtOAc were added to the mixture. The organic layer was separated, and the aqueous layer was extracted with EtOAc. The combined organic layer was washed with brine, dried over Na2SO4, and evaporated. The resulting residue was purified by preparative thin layer chromatography (CHCl3:MeOH:H2O = 3:1:0.1) to give derivative 18 (4.0 mg, 34%). H (500 MHz; CD3OD) 6.91 (0.5 H, s), 6.88 (0.5 H, s), 5.25 (1 H, d, *J* 7.3 Hz), 4.59 (1 H, br), 4.24 (1 H, m), 4.07 (1 H, m), 3.97-3.75 (2 H, m), 3.20 (1 H, dd, *J* 5.6, 5.6 Hz), 2.67 (1 H, m), 2.60-2.35 (2 H, m), 1.93 (1 H, m), 1.785 (1.5 H, s), 1.776 (1.5 H, s), 1.74 (3 H, s), 1.724 (1.5 H, s), 1.717 (1.5 H, s), 1.29 (3 H, s), 1.55-1.20 (20 H, m), 1.00 (3 H, d, *J* 7.0 Hz), 0.92 (3 H, d, *J* 6.4 Hz), 0.89 (3 H, t, *J* 6.8 Hz); HRMS (ESI) calcd. for C35H57O9 (M-H)- 621.4003, found 601.4022.

# Synthesis of derivative 19

# Ethyl (2*E*,6*E*)-2,4,4,6-tetramethyl-5-(triphenylsiloxy)-7-iodo-2,6-heptadienoate 48

# To a suspension of manganese dioxide (4.40 g, 50.6 mmol) in dichloromethane (10 mL) was added a solution of 47 (1.00 g, 5.05 mmol) in dichloromethane (2.0 mL) at room temperature. After stirred at this temperature for 12 h, the reaction mixture was filtered through Celite and evaporated to give the crude aldehyde, which was used without further purification. To a solution of di-*i*-propyl amine (0.93 mL, 6.64 mmol) in THF (7.0 mL) was added *n*-butyllithium (3.87 mL, 6.08 mmol, 1.57 M in hexane) at 0 ˚C. After stirred at this temperature for 5 min, the reaction mixture was cooled to –78 ˚C, methyl isobutyrate (0.63 mL, 5.53 mmol) was added. A solution of the crude aldehyde in THF (1.5 mL) was added and the reaction mixture was stirred at –78 ˚C for 30 min. The mixture was quenched with saturated NaHCO3 and extracted with EtOAc. The combined organic layer was washed with brine, dried over Na2SO4, and evaporated. The resulting residue was purified by silica gel column chromatography (hexane:EtOAc = 10:1) to give the adduct (1.20 g, 2 steps 80%) as a colorless oil. H (300 MHz, CDCl3) 6.29 (1 H, s), 4.30 (1 H, s), 3.72 (3 H, s), 3.26 (1 H, br s), 1.78 (3 H, s), 1.22 (3 H, s), 1.15 (3 H, s); C (75 MHz, CDCl3) 177.8, 146.8, 81.6, 52.3, 46.3, 23.7, 21.3, 20.7; *m/z* (ESI) 321 (M+Na)+.

# To a solution of the alcohol (1.10 g, 3.69 mmol) in DMF (7.4 mL) was added imidazole (754 mg, 11.1 mmol) and triphenylsilyl chloride (1.41 g, 4.78 mmol) at 0 ˚C. After stirred at room temperature for 5 h, the reaction mixture was poured into cooled saturated NaHCO3 and extracted with diethyl ether. The combined organic layer was washed with H2O and brine, dried over Na2SO4, and evaporated. The resulting residue was purified by silica gel column chromatography (hexane:EtOAc = 30:1) to give the TPS ether, which was used without further purification. To a solution of the TPS ether in dichloromethane (15 mL) at –78 ˚C was added diisodutylaluminum hydride (12.0 mL, 11.2 mmol, 0.93 M in hexane) dropwise. After stirred at this temperature for 30 min, the reaction mixture was quenched with MeOH and then aqueous Rochelle salt and EtOAc was added. The mixture was warmed to room temperature and stirred vigorously for 5 h. The organic layer was separated, and the aqueous layer was extracted with EtOAc. The combined organic layer was washed with brine, dried over Na2SO4, and evaporated. The resulting residue was purified by silica gel column chromatography (hexane:EtOAc = 10:1) to give the corresponding alcohol (1.89 g, 2 steps 97%) as a colorless oil. H (400 MHz, CDCl3) 7.59 (6 H, dd, *J* 7.8, 1.5 Hz), 7.44 (3 H, tt, *J* 7.3, 1.5 Hz), 7.38 (6 H, dd, *J* 7.8, 7.3 Hz), 6.04 (1 H, s), 4.34 (1 H, s), 3.53 (1 H, d, *J* 11.0 Hz), 3.20 (1 H, d, *J* 11.0 Hz), 1.59 (3 H, s), 0.89 (3 H, s), 0.87 (3 H, s); C (100 MHz, CDCl3) 147.5, 135.6, 133.5, 130.2, 127.9, 82.9, 82.4, 69.9, 40.4, 22.5, 21.0, 20.6; *m/z* (ESI) 551 (M+Na)+.

# To a solution of oxalyl chloride (0.61 mL, 7.11 mmol) in dichloromethane (20 mL) was added DMSO (1.01 mL, 14.2 mmol) at –78 ˚C slowly. The mixture was stirred for 10 min, and then a solution of the alcohol (1.89 g, 3.58 mmol) in dichloromethane (5.0 mL) was added. After the reaction mixture was stirred at this temperature for 1 h, triethylamine (3.94 mL, 28.4 mmol) was added. The mixture was warmed to 0 ˚C and further stirred for 1 h. The reaction was quenched with saturated NH4Cl and extracted with EtOAc. The combined organic layer was washed with brine and dried over Na2SO4 and evaporated. The resulting residue was filtered through a short column of silica gel (hexane:EtOAc = 20:1) to give the corresponding aldehyde, which was used without further purification. To a solution of (carbethoxyethylidene)triphenylphosphorane (3.53 g, 9.74 mmol) in toluene (10 mL) was added the crude aldehyde in toluene (5.0 mL) at room temperature and the mixture was stirred at reflux for 5 h. The cooled reaction mixture was added saturated NaHSO4 and extracted with EtOAc. The organic layer was washed with brine, dried over Na2SO4, and evaporated. The resulting residue was purified by silica gel column chromatography (hexane: EtOAc = 20:1) to give the corresponding iodide (48) (2.18 g, 2 steps 91%) as a colorless oil. H (300 MHz, CDCl3) 7.58 (6 H, d, *J* 7.1 Hz), 7.46-7.30 (9 H, m), 7.10 (1 H, s), 6.00 (1 H, s), 4.22-4.13 (2 H, m), 4.18 (1 H, s), 1.86 (3 H, s), 1.58 (3 H, s), 1.27 (3 H, t, *J* 7.1 Hz), 1.13 (6 H, s); C (75 MHz, CDCl3) 169.0, 147.5, 146.6, 135.6, 133.6, 130.0, 127.8, 127.0, 85.4, 82.7, 60.8, 42.0, 25.5, 24.6, 17.3, 14.3, 13.5.

# Ethyl (2*E*,6*E*,8*E*,10*S*,11*R*,12*S*)-2,4,4,6,8,10,12-heptamethyl-5-(triphenylsiloxy)-11-(4-methoxybenzyloxy)-2,6,8-docosatrienoate 49

# To a solution of the alkyne (3) (760 mg, 1.97 mmol) in THF (8.0 mL) was added 9-BBN (7.90 mL, 3.95 mmol, 0.5 M in THF) at 0 ˚C. After stirring at room temperature for 12 h, a solution of the iodide (48) (1.00 g, 1.64 mmol) in DMF (8.0 mL), H2O (8.0 mL), K3PO4 (1.68 g, 7.91 mmol), and PdCl2(dppf) (268 mg, 0.330 mmol) was added and stirred at 65 ˚C for 20 min. The reaction mixture was cooled to room temperature, diluted with EtOAc, and filtered through Celite. The filtrate was washed with saturated NaHCO3, H2O, and brine, dried over Na2SO4, and evaporated. The resulting residue was filtered by silica gel column chromatography (hexane:EtOAc = 10:1) to give the corresponding adduct, which was used without further purification**.** To a solution of adduct in dichloromethane (7.0 mL) at –78 ˚C was added diisodutylaluminum hydride (3.70 mL, 3.44 mmol, 0.93 M in hexane) dropwise. After stirred at this temperature for 30 min, the reaction mixture was quenched with MeOH and then added aqueous Rochelle salt and EtOAc was added. The mixture was warmed to room temperature and stirred vigorously for 5 h. The organic layer was separated, and the aqueous layer was extracted with EtOAc. The combined organic layer was washed with brine, dried over Na2SO4, and evaporated. The resulting residue was purified by silica gel column chromatography (hexane:EtOAc = 8:1) to give the corresponding alcohol (49) (1.10 g, 2 steps 86%) as a colorless oil. (diastereoisomers 1:1 by 1H NMR analysis). H (400 MHz, CDCl3) 7.64-7.58 (6 H, m), 7.42-7.28 (9 H, m), 7.25-7.20 (2 H, m), 6.87-6.81 (2 H, m), 5.59 (0.5 H, s), 5.57 (0.5 H, s), 5.55 (1 H, s), 5.21-5.15 (1 H, m), 4.48 (1 H, d, *J* 10.6 Hz), 4.43 (1 H, d, *J* 10.6 Hz), 4.03 (1 H, s), 3.79 (2 H, m), 3.77 (3 H, s), 3.05 (1 H, m), 2.70 (1 H, m), 1.64 (3 H, s), 1.62 (3 H, s), 1.55 (3 H, s), 1.40-1.20 (19 H, m), 1.15 (3 H, s), 1.08 (3 H, s), 0.98 (3 H, d, *J* 6.8 Hz), 0.94 (3 H, d, *J* 6.6 Hz), 0.88 (3 H, m); *m/z* (ESI) 851 (M+Na)+.

# (1*R*,2*S*,3*R*)-1-[(4-Methoxybenzyloxy)methyl]-2,3-bis(4-methoxybenzyloxy)-4 hydroxybutyl (2*E*,6*E*,8*E*,10*S*,11*R*,12*S*)-2,4,4,6,8,10,12-heptamethyl-5-(triphenyl-

# siloxy)-11-(4-methoxybenzyloxy)-2,6,8-docosatrienoate 50

# To a solution of oxalyl chloride (0.22 mL, 2.57 mmol) in dichloromethane (10 mL) was added DMSO (0.36 mL, 5.07 mmol) at –78 ˚C slowly. The mixture was stirred for 10 min, and then a solution of alcohol 49 (1.05 g, 1.27 mmol) in dichloromethane (3 mL) was added. After the reaction mixture was stirred at this temperature for 1 h, triethylamine (1.41 mL, 10.2 mmol) was added. The mixture was warmed to 0 ˚C and further stirred for 1 h. The reaction was quenched with saturated NH4Cl and extracted with EtOAc. The combined organic layer was washed with brine and dried over Na2SO4 and evaporated to give the crude aldehyde, which was used without further purification. To a solution of the crude aldehyde as above in *tert-*butyl alcohol (10 mL) and 2-methyl-2-butene (6.0 mL) was added a mixture of sodium chlorite (1.27 g) and sodium dihydrogenphosphate (1.27 g) in water (10 mL). After stirred for 12 h at room temperature, the reaction mixture was diluted with EtOAc and 0.5 M KHSO4. The organic layer was separated, and the aqueous layer was extracted with EtOAc. The combined organic layer was washed with 10% NaHSO3 and brine, dried over Na2SO4, and evaporated. The resulting residue was purified by silica gel column chromatography (hexane:EtOAc = 5:1 to 3:1) to give the corresponding adduct (913 mg, 2 steps 86%) as a colorless oil. H (300 MHz, CDCl3) 7.65-7.58 (6 H, m), 7.43-7.28 (10 H, m), 7.21 (2 H, d, *J* 8.6 Hz), 6.84 (1 H, d, *J* 8.6 Hz), 6.83 (1 H, d, *J* 8.6 Hz), 5.59 (1 H, s), 5.20-5.14 (1 H, m), 4.48 (1 H, d, *J* 10.7 Hz), 4.42 (1 H, d, *J* 10.7 Hz), 4.00 (1 H, s), 3.77 (3 H, s), 3.04 (1 H, t, *J* 5.0 Hz), 2.67 (1 H, m), 1.88 (3 H, s), 1.61 (3 H, s), 1.54 (3 H, s), 1.38-1.18 (19 H, m), 1.15 (3 H, s), 1.13 (3 H, s), 0.97 (3 H, d, *J* 6.8 Hz), 0.93 (3 H, d, *J* 6.6 Hz), 0.88 (3 H, t, *J* 6.3 Hz); *m/z* (ESI) 865 (M+Na)+.

# To a solution of the acid (860 mg, 1.04 mmol) and the alcohol 5 (782 mg, 1.25 mmol) in dichloromethane (10 mL) was added *N,N*-dimethylaminopyridine (635 mg, 5.20 mmol), 1-(3-dimethylaminopropyl)-3-ethylcarbodiimide hydrochloride (400 mg, 2.09 mmol). The reaction mixture was heated at reflux for 5 h. After cooled to room temperature, the reaction mixture was diluted with EtOAc. The organic layer was washed with 0.5 M KHSO4, saturated NaHCO3 and brine, dried over Na2SO4, and evaporated. The resulting residue was filtered by silica gel column chromatography (hexane:EtOAc = 5:1 to 3:1) to give the adduct, which was used without further purification. To a solution of the adduct in THF (40 mL) was added a 1 M aqueous HCl solution (11.3 mL) at room temperature. After stirred at this temperature for 12 h, the reaction mixture was quenched with saturated NaHCO3, and extracted with EtOAc. The combined organic layer was washed with brine, dried over Na2SO4, and evaporated. The resulting residue was purified by silica gel column chromatography (hexane:EtOAc = 3:1) to give the corresponding alcohol (50) (902 mg, 2 steps 65%) as a colorless oil. H (300 MHz, CDCl3) 7.59 (6 H, d, *J* 7.5 Hz), 7.40-7.24 (9 H, m), 7.23-7.19 (8 H, m), 6.86-6.73 (9 H, m), 5.57 (0.5 H, s), 5.55 (0.5 H, s), 5.26 (1 H, m), 5.17 (0.5 H, d, *J* 9.7 Hz), 5.13 (0.5 H, d, *J* 9.7 Hz), 4.63-4.34 (8 H, m), 3.97 (1 H, s), 3.93-3.82 (2 H, m), 3.73-3.70 (2 H, m), 3.70-3.50 (4 H, m), 3.02 (1 H, m), 2.67 (1 H, m), 1.97 (1 H, br s), 1.89 (1.5 H, s), 1.88 (1.5 H, s), 1.58 (1.5 H, s), 1.56 (1.5 H, s), 1.51 (3 H, s), 1.35-1.15 (19 H, m), 1.13 (6 H, s), 0.95 (3 H, d, *J* 6.8 Hz), 0.92 (3 H, d, *J* 6.8 Hz), 0.88 (3 H, d, *J* 6.9 Hz); *m/z* (ESI) 1359 (M+Na)+.

# (2*S*,3*S*,4*R*)-2,3,5-trihydroxy-4-[[(2*E*,6*E*,8*E*,10*S*,11*R*,12*S*)-1,5-dioxo-2,4,4,6,8,10,12-heptamethyl-11-hydroxy-2,6,8-docosatrienyl]oxy]pentanoic acid 19

# To a solution of the alcohol (50) (820 mg, 0.613 mmol) and acetic acid (0.530 mL, 9.26 mmol) in THF (20 mL) was added tetrabutylammonium fluoride (6.10 mL, 6.10 mmol, 1.0 M in THF) at room temperature. After stirred at 50 ˚C for 7 h, the reaction mixture was cooled to room temperature, poured into saturated NaHCO3 and extracted with EtOAc. The combined organic layer was washed with brine, dried over Na2SO4, and evaporated. The resulting residue was purified by silica gel column chromatography (hexane:EtOAc = 3:2) to give the corresponding diol (591 mg, 89%) as a colorless oil. H (300 MHz, CDCl3) 7.25-7.16 (8 H, m), 7.08 (0.5 H, q, *J* 1.1 Hz), 7.06 (0.5 H, q, *J* 1.1 Hz), 6.87-6.79 (8 H, m), 5.85 (1 H, s), 5.36 (1 H, d, *J* 9.5 Hz), 5.24 (1 H, m), 4.67-4.38 (8 H, m), 3.94-3.82 (3 H, m), 3.81-3.56 (16 H, m), 3.07 (1 H, t, *J* 4.7 Hz), 2.74 (1 H, m), 1.99 (3 H, s), 1.75 (1.5 H, s), 1.74 (1.5 H, s), 1.72 (3 H, s), 1.35-1.15 (19 H, m), 1.20 (3 H, s), 1.18 (3 H, s), 0.99 (3 H, d, *J* 6.8 Hz), 0.94 (1.5 H, d, *J* 6.6 Hz), 0.93 (1.5 H, d, *J* 6.8 Hz), 0.88 (3 H, t, *J* 6.7 Hz); *m/z* (ESI) 1101 (M+Na)+.

# To a solution of the diol (590 mg, 0.547 mmol) and pyridine (0.180 mL, 2.23 mmol) in dichloromethane (5.5 mL) was added Dess–Martin periodinane (700 mg, 1.65 mmol) at 0 ˚C. After stirred at room temperature for 2.5 h, the reaction mixture was diluted with EtOAc. The organic layer was washed with saturated NaHCO3, 10% NaHSO3, and brine, dried over Na2SO4, and evaporated. The residue was filtered through a short column of silica gel (hexane:EtOAc = 3:1) to give the corresponding ketoaldehyde as a colorless oil, which was used without further purification. To a solution of the ketoaldehyde in *tert*-butyl alcohol (2.5 mL) and 2-methyl-2-butene (1.5 mL) was added a mixture of sodium chlorite (230 mg) and sodium dihydrogenphosphate (230 mg) in water (2.5 mL). After stirred for 20 h at room temperature, the reaction mixture was diluted with EtOAc and 0.5 M KHSO4. The organic layer was separated, and the aqueous layer was extracted with EtOAc. The combined organic layer was washed with 10% NaHSO3 and brine, dried over Na2SO4, and evaporated. The resulting residue was purified by silica gel column chromatography (hexane:acetone = 2:1) to give the corresponding ketoacid (243 mg, 2 steps 41%) as a colorless oil. H (400 MHz, CDCl3) 7.23-7.05 (8 H, m), 6.88-6.72 (9 H, m), 5.60 (1 H, d, *J* 9.5 Hz), 5.24 (1 H, m), 4.56-4.41 (5 H, m), 4.35-4.26 (4 H, m), 4.08 (1 H, m), 3.78 (3 H, s), 3.77 (3 H, s), 3.77 (3 H, s), 3.76 (2 H, m), 3.72 (3 H, s), 3.09 (1 H, t, *J* 5.2 Hz), 2.73 (1 H, m), 1.92 (3 H, s), 1.69 (3 H, s), 1.59 (3 H, s), 1.38 (6 H, s), 1.35-1.12 (19 H, m), 0.97 (3 H, d, *J* 6.8 Hz), 0.92 (3 H, d, *J* 6.6 Hz), 0.88 (3 H, d, *J* 6.7 Hz);C (100 MHz, CDCl3) 205.6, 173.1, 166.9, 148.8, 144.3, 139.1, 131.2, 131.0, 130.8, 130.1, 130.0, 129.8, 129.3, 129.2, 129.0, 128.1, 127.9, 113.9, 113.7, 113.7, 113.6, 87.0, 77.6, 74.4, 74.4, 73.5, 72.8, 71.8, 67.5, 55.2, 55.2, 55.1, 55.1, 47.6, 36.2, 36.1, 34.2, 31.9, 30.1, 30.0, 29.7, 29.6, 29.3, 27.9, 27.7, 27.2, 22.7, 18.0, 16.8, 14.7, 14.3, 14.1, 14.1, 13.2; *m/z* (ESI) 1113 (M+Na)+.

# To a solution of the ketoacid (50.3 mg, 0.283 mmol) in dichloromethane (4.0 mL) was added BCl3 (0.23 mL, 0.23 mmol, 1.0 M in heptane) at –78 ˚C. After stirred at this temperature for 5 min, the reaction mixture was quenched with saturated NaHCO3 and poured into aqueous citric acid and EtOAc. The organic layer was separated, and the aqueous layer was extracted with EtOAc. The combined organic layer was washed with brine, dried over Na2SO4, and evaporated. The resulting residue was purified by preparative thin layer chromatography on silica gel (CHCl3:MeOH:H2O = 4:1:0.1) to give the derivative (19) (8.2 mg, 50%) as a colorless oil. []D19.8 –15 (*c* 0.072 in CH3OH); max(film)/cm–1 3399, 2926, 2854, 1698, 1613, 1250, 1039; H (500 MHz, CD3OD) 7.27 (1 H, s), 6.96 (1 H, s), 5.59 (1 H, d, *J* 9.4 Hz), 4.99 (1 H, m), 4.23 (1 H, m), 4.05 (1 H, m), 3.90 (1 H, dd, *J* 12.2, 3.1 Hz), 3.82 (1 H, dd, *J* 12.2, 4.6 Hz), 3.78 (1 H, m), 2.70 (1 H, m), 1.92 (3 H, s), 1.82 (3 H, s), 1.58 (3 H, s), 1.50-1.06 (19 H, m), 1.36 (6 H, s), 0.98 (3 H, d, *J* 7.0 Hz), 0.89 (3 H, d, *J* 6.7 Hz), 0.88 (3 H, d, *J* 7.3 Hz); C (100 MHz, CD3OD) 207.8, 171.7, 168.7, 149.7, 146.6, 141.2, 132.7, 131.5, 129.4, 79.8, 75.7, 72.4, 71.5, 61.7, 37.4, 37.2, 34.7, 33.1, 31.0, 30.8, 30.8, 30.7, 30.5, 28.4, 28.3, 28.1, 23.7, 18.0, 16.9, 14.6, 14.4, 13.6; HRMS (ESI) calcd. for C34H59O9 (M-H)- 609.4003, found 609.4001.

# Synthesis of derivative 20

# (4*S*,5*R*,6*S*)-4,6-Dimethyl-5-acetoxy-2-hexadecyne 51

# To a solution of fragment (3) (1.45 g, 3.76 mmol) in dichloromethane (4.0 mL) was added trifluoroacetic acid (2.0 mL) at 0 ˚C. After stirred at this temperature for 1 h, the reaction mixture was quenched with saturated NaHCO3. The organic layer was separated, and the aqueous layer was extracted with EtOAc. The combined organic layer was washed with brine, dried over Na2SO4, and evaporated. The resulting residue was filtered through a short column of silica gel (hexane:EtOAc = 9:1) to give the crude alcohol as a colorless oil, which was used without further purification. To a solution of the crude alcohol in dichloromethane (3.6 mL) at 0 ˚C was added pyridine (3.6 mL) and acetic anhydride (3.6 mL). After stirring at room temperature for 3 h, 4-dimethylaminopyridine (22 mg) was added and further stirred for 1 h. The reaction mixture was evaporated and the residue was diluted with EtOAc. The organic layer was washed with saturated NH4Cl, saturated NaHCO3, and brine, dried over Na2SO4, and evaporated. The resulting residue was purified by silica gel column chromatography (hexane:diethyl ether = 40:1) to give the corresponding acetate (51) (938 mg, 2 steps 81%) as a colorless oil. H (300 MHz, CDCl3) 4.73 (1 H, dd, *J* 6.4, 5.9 Hz), 2.74 (1 H, m), 2.11 (3 H, s), 1.78 (1 H, d, *J* 2.4 Hz), 1.40-1.18 (19 H, m), 1.10 (3 H, d, *J* 7.0 Hz), 0.88 (3 H, t, *J* 6.7 Hz), 0.86 (3 H, d, *J* 6.6 Hz); C (75 MHz, CDCl3) 170.9, 79.7, 79.0, 77.0, 34.5, 33.1, 31.9, 29.7, 29.6, 29.6, 29.6, 29.3, 28.6, 26.1, 22.7, 21.0, 17.9, 14.4, 14.1, 3.5.

# (1*R*,2*S*,3*R*)-1-[(4-Methoxybenzyloxy)methyl]-2,3-bis(4-methoxybenzyloxy)-4-hydroxybutyl (2*E*,4*R*,5*R*,6*E*,8*E*,10*S*,11*R*,12*S*)-2,4,6,8,10,12-hexamethyl-5-

# (triphenylsiloxy)-11-acetoxy-2,6,8-docosatrienoate 52

# To a solution of the alkyne (51) (450 mg, 1.46 mmol) in THF (5.8 mL) was added 9-BBN (5.84 mL, 2.92 mmol, 0.5 M in THF) at 0 ˚C. After stirring at room temperature for 12 h, a solution of the iodine (13) (1.56 g, 1.33 mmol) in DMF (6.0 mL), H2O (6.0 mL), K3PO4 (1.41 g, 6.64 mmol), and PdCl2(dppf) (217 mg, 0.266 mmol) were added and stirred at 65 ˚C for 30 min. The reaction mixture was cooled to room temperature, diluted with EtOAc, and filtered through Celite. The filtrate was washed with saturated Na2HCO3, H2O, and brine, dried over Na2SO4, and evaporated. The resulting residue was filtered through a short column of silica gel (hexane:EtOAc = 7:1) to give the corresponding adduct as a colorless oil, which was used without further purification. To a solution of the adduct in acetonitrile (70 mL) at –10 ˚C was added aqueous 46% hydrogen fluoride (0.7 mL) dropwise. After stirred at this temperature for 3 h, the reaction mixture was quenched with saturated NaHCO3 and extracted with EtOAc. The organic layer was washed with brine, dried over Na2SO4, and evaporated. The resulting residue was purified by silica gel column chromatography (hexane:EtOAc = 2:1) to give the corresponding alcohol (52) (692 mg, 2 steps 42%) as a colorless oil and diol (310mg, 2 steps 24%) as a colorless oil. max(film)/cm–1 3498, 2927, 1710, 1615, 1515, 1460, 1247, 1039, 823, 707; H (400 MHz, CDCl3) 7.56 (6 H, d, *J* 7.5 Hz), 7.40-7.23 (9 H, m), 7.23-7.06 (6 H, m), 6.88-6.73 (7 H, m), 5.46 (1 H, s), 5.29 (1 H, m), 4.98 (1 H, d, *J* 9.5 Hz), 4.77 (1 H, dd, *J* 6.1, 5.4 Hz), 4.54 (1 H, *J* 10.5 Hz), 4.48 (1 H, d, *J* 10.9 Hz), 4.46 (1 H, d, *J* 11.7 Hz), 4.43 (1 H d, *J* 11.7 Hz), 4.43 (1 H, d, *J* 10.5 Hz), 4.39 (1 H, d, *J* 10.9 Hz), 3.98 (1 H, d, *J* 7.3 Hz), 3.99-3.50 (6 H, m), 3.77 (3 H, s), 3.77 (3 H, s), 3.75 (3 H, s), 2.88 (1 H, m), 2.70 (1 H, m), 1.98 (3 H, s), 1.90 (3 H, s), 1.60 (3 H, s), 1.53 (3 H, s), 1.40-1.15 (18 H, m), 1.09 ( 1 H, m), 0.90 (3 H, d, *J* 6.8 Hz), 0.88 (3 H, t, *J* 6.8 Hz), 0.82 (3 H, d, *J* 6.6 Hz); C (100 MHz, CDCl3) 170.7, 167.4, 159.2, 159.2, 159.1, 146.6, 135.6, 134.5, 134.4, 134.4, 132.5, 132.1, 131.7, 130.7, 130.3, 130.2, 129.9, 129.8, 129.6, 129.2, 127.6, 113.7, 113.7, 113.7, 84.0, 80.0, 79.1, 79.0, 74.0, 73.2, 72.8, 72.8, 68.0, 61.9, 55.2, 55.2, 55.2, 38.7, 34.5, 34.4, 33.6, 31.9, 29.9, 29.6, 29.6, 29.6, 29.3, 26.9, 22.6, 20.9, 17.5, 16.7, 16.5, 14.1, 14.0, 13.2, 12.9.

# (2*S*,3*S*,4*R*)-2,3,5-Tris(4-methoxybenzyloxy)-4-[[(2*E*,4*R*,6*E*,8*E*,10*S*,11*R*,12*S*)-1-

# oxo-2,4,6,8,10,12-hexamethyl-5-(triphenylsiloxy)-11-hydroxy-2,6,8-docosatrienyl]

# oxy]pentanoic acid 53

# To a solution of the alcohol (52) (692 mg, 0.556 mmol) and pyridine (0.180 mL, 2.23 mmol) in dichloromethane (10.0 mL) was added Dess–Martin periodinane (472 mg, 1.11 mmol) at 0 ˚C. After stirred at room temperature for 3 h, the reaction mixture was diluted with EtOAc. The organic layer was washed with saturated NaHCO3, 10% NaHSO3, and brine, dried over Na2SO4, and evaporated. The residue was filtered through a short column of silica gel (hexane:EtOAc = 4:1) to give the corresponding aldehyde as a colorless oil, which was used without further purification. To a solution of the aldehyde in *tert-*butyl alcohol (5.5 mL) and 2-methyl-2-butene (3.3 mL) was added a mixture of sodium chlorite (1.1 g) and sodium dihydrogenphosphate (1.1 g) in water (5.5 mL). After stirred for 20 h at room temperature, the reaction mixture was diluted with EtOAc and 0.5 M KHSO4. The organic layer was separated, and the aqueous layer was extracted with EtOAc. The combined organic layer was washed with 10% NaHSO3 and brine, dried over Na2SO4, and evaporated. The resulting residue was purified by silica gel column chromatography (hexane:acetone = 3:1) to give the corresponding acid (462 mg, 2 steps 66%) as a colorless oil. max(film)/cm–1 3497, 2927, 2857, 1712, 1614, 1515, 1248, 1037, 823, 744, 707; H (400 MHz, CDCl3) 7.55 (6 H, d, *J* 7.1 Hz), 7.38-7.25 (9 H, m), 7.16 (2 H, d, *J* 8.5 Hz), 7.14 (2 H, d, *J* 8.5 Hz), 7.06 (2 H, d, *J* 8.5 Hz), 6.79 (2 H, d, *J* 8.5 Hz), 6.78 (2 H, d, *J* 8.5 Hz), 6.78 (1 H, m), 6.76 (2 H, d, *J* 8.5 Hz), 5.50 (1 H, s), 5.26 (1 H, ddd, *J* 7.6, 3.8, 3.1 Hz), 4.99 (1 H, d, *J* 9.5 Hz), 4.76 (1 H, dd, *J* 6.1, 5.9 Hz), 4.46 (1 H, d, *J* 10.3 Hz), 4.44 (1 H, d, *J* 11.4 Hz), 4.40 (1 H, d, *J* 10.3 Hz), 4.36-4.21 (6 H, m), 4.04-3.97 (2 H, m), 3.76 (3 H, s), 3.74 (3 H, s), 3.74 (3 H, s), 2.94-2.81 (1 H, m), 2.75-2.65 (1 H, m), 1.98 (3 H, s), 1.88 (3 H, s), 1.67 (1 H, m), 1.60 (3 H, s), 1.52 (3 H, s), 1.37-1.17 (17 H, m), 1.09 (1 H, m), 0.90 (3 H, d, *J* 6.8 Hz), 0.88 (3 H, d, *J* 6.8 Hz), 0.88 (3 H, t, *J* 6.8 Hz), 0.83 (3 H, d, *J* 6.8 Hz); C (100 MHz, CDCl3) 172.2, 170.8, 167.0, 159.7, 159.4, 159.2, 147.0, 135.6, 134.5, 134.4, 132.6, 132.1, 131.8, 130.3, 130.0, 129.8, 129.5, 129.3, 128.2, 127.7, 127.6, 127.5, 114.0, 113.8, 113.7, 84.3, 80.1, 78.0, 77.6, 74.5, 74.1, 72.9, 71.6, 67.7, 55.2, 55.2, 55.2, 38.7, 34.5, 34.4, 33.6, 31.9, 29.9, 29.6, 29.6, 29.6, 29.3, 27.0, 22.7, 20.9, 17.6, 16.7, 16.5, 14.1, 14.0, 13.2, 12.9.

# To a solution of the acid (20.0 mg, 0.0159 mmol) in dichloromethane (0.6 mL) at –78 ˚C was added diisobutylaluminum hydride (0.060 mL, 0.056 mmol, 0.93 M in hexane) dropwise. After stirred at this temperature for 10 min, the reaction mixture was quenched with MeOH and then added aqueous Rochelle salt and EtOAc was added. The mixture was warmed to room temperature and stirred vigorously for 5 h. The organic layer was separated, and the aqueous layer was extracted with EtOAc. The combined organic layer was washed with brine, dried over Na2SO4, and evaporated. The resulting residue was purified by silica gel column chromatography (hexane:acetone = 2:1) to give the corresponding seco acid (53, 9.3 mg, 48%) as a colorless oil. max(thin film)/cm–1 3497, 2926, 1711, 1615, 1515, 1461, 1249, 1037, 822, 744, 707; H (400 MHz, CDCl3) 7.56 (6 H, d, *J* 7.6 Hz), 7.35-7.27 (9 H, m), 7.18 (2 H, d, *J* 8.5 Hz), 7.13 (2 H, d, *J* 8.5 Hz), 7.07 (2 H, d, *J* 8.5 Hz), 6.78 (2 H, d, *J* 8.5 Hz), 6.78 (2 H, d, *J* 8.5 Hz), 6.77 (1 H, m), 6.76 (2 H, d, *J* 8.5 Hz), 5.58 (1 H, s), 5.24 (1 H, ddd, *J* 8.3, 4.9, 3.4 Hz), 4.85 (1 H, d, *J* 10.0 Hz), 4.50-4.38 (6 H, m), 4.35-4.22 (3 H, m), 4.07-3.99 (2 H, m), 3.75 (3 H, s), 3.75 (3 H, s), 3.74 (3 H, s), 3.18 (1 H, dd, *J* 8.0, 3.7 Hz), 2.95-2.80 (1 H, m), 2.58-2.47 (1 H, m), 1.86 (3 H, s), 1.59 (3 H, s), 1.55 (1 H, m), 1.35-1.18 (9 H, m), 0.88 (3 H, d, *J* 6.8 Hz), 0.93-0.85 (9 H, m); C (100 MHz, CDCl3) 172.6, 167.0, 159.6, 159.3, 159.1, 146.7, 135.6, 134.6, 134.3, 133.7, 132.6, 132.4, 130.3, 130.0, 129.9, 129.4, 129.3, 128.3, 127.7, 127.7, 127.5, 113.9, 113.7, 113.6, 83.6, 78.2, 77.6, 77.5, 74.4, 73.8, 72.9, 71.6, 67.7, 55.2, 55.2, 55.2, 38.6, 36.3, 34.5, 34.4, 31.9, 29.9, 29.7, 29.7, 29.6, 29.3, 27.4, 22.7, 17.1, 17.1, 16.3, 14.1, 13.7, 12.9, 12.8.

# (3*S*,4*S*,5*R*,8*E*,10*R*,11*R*,12*E*,14*E*,16*S*,17*R*)-3,4-Bis(4-methoxybenzyloxy)-5-[(4-

# methoxybenzyloxy)methyl]-8,10,12,14,16-pentamethyl-11-(triphenylsiloxy)-17-

# [(1*S*)-1-methylundecyl]-1,6-dioxa-8,12,14-cycloheptadecatriene-2,7-dione 54

# To a solution of seco acid (106.2 mg, 0.0873 mmol) and triethylamine (0.057 mL, 0.411 mmol) in THF (3.0 mL) was added 2,4,6-trichlorobenzoyl chloride (0.035 mL, 0.23 mmol) at room temperature. After stirring at this temperature for 2 h, DMAP (150 mg, 1.23 mmol) in toluene (78 mL) was added and stirred for a further 15 h at reflux then cooled to room temperature. The reaction mixture was washed with 0.5 M KHSO4, saturated NaHCO3 and brine, dried over Na2SO4, and evaporated. The resulting residue was purified by silica gel column chromatography (hexane:EtOAc = 4:1) to give the corresponding macrocycle (54, 42.0 mg, 40%) as a colorless oil. []D23.1. +40.0 (*c* 0.25., CHCl3); max(film)/cm–1 3503, 2926, 2856, 1748, 1710, 1614, 1513, 1248, 1096, 1036, 823, 712; H (400 MHz, CDCl3) 7.63 (6 H, d, *J* 8.1 Hz), 7.45-7.32 (9 H, m), 7.18 (2 H, d, *J* 8.8 Hz), 7.14 (2 H, d, *J* 8.8 Hz), 7.08 (2 H, d, *J* 8.8 Hz), 6.79 (2 H, d, *J* 8.8 Hz), 6.76 (2 H, d, *J* 8.8 Hz), 6.73 (2 H, d, *J* 8.8 Hz), 6.43 (1 H, d, *J* 10.2 Hz), 5.58 (1 H, s), 5.17 (1 H, d, *J* 7.8 Hz), 4.95 (1 H, d, *J* 9.8 Hz), 4.85 (1 H, m), 4.72 (1 H, d, *J* 10.5 Hz), 4.59 (1 H, d, *J* 11.5 Hz), 4.45 (1 H, d, *J* 12.2 Hz), 4.38 (1 H, m), 4.17 (1 H, m), 4.12 (1 H, m), 3.80-3.70 (2 H, m), 3.77 (3 H, s), 3.76 (3 H, s), 3.69 (3 H, s), 2.89-2.79 (1 H, m), 2.75-2.53 (1 H, m), 1.81 (3 H, s), 1.76 (3 H, s), 1.75-1.57 (2 H, m), 1.51 (3 H, s), 1.41 (1 H, m), 1.35-1.10 (16 H, m), 1.10 (3 H, d, *J* 5.8 Hz), 1.01 (3 H, d, *J* 6.1 Hz), 0.95 (3 H, d, *J* 7.1 Hz), 0.88 (3 H, d, *J* 6.4 Hz); C (100 MHz, CDCl3) 171.5, 166.3, 159.2, 159.1, 159.1, 143.9, 135.4, 134.5, 134.4, 134.3, 134.3, 134.1, 132.9, 132.6, 130.0, 130.0, 129.1, 129.0, 127.8, 127.8, 127.0, 113.7, 113.6, 113.5, 82.6, 80.1, 77.2, 73.4, 72.8, 72.6, 72.6, 71.4, 67.6, 55.2, 55.2, 55.1, 38.7, 40.2, 35.2, 34.7, 34.0, 31.9, 29.8, 29.7, 29.7, 29.6, 29.3, 27.4, 22.7, 18.8, 16.8, 16.2, 14.4, 14.2, 14.1, 12.3; *m/z* (ESI) 1121 (M+Na)+.

# (3*S*,4*S*,5*R*,8*E*,10*R*,12*E*,14*E*,16*S*,17*R*)-3,4-dihydroxy-5-(hydroxymethyl)-8,10,12,14,16-pentamethyl-17-[(1*S*)-1-methylundecyl]-1,6-dioxa-8,12,14-cycloheptadecatriene-2,7,11-trione 20

# To a solution of the macrocycle (62.5 mg, 0.0521 mmol) in acetonitrile (5.0 mL) was added 46% hydrogen fluoride in water (0.2 mL) at 0 ˚C. After stirred at this temperature for 10 h, the reaction mixture was quenched with saturated NaHCO3 and extracted with EtOAc. The organic layer was washed with brine, dried over Na2SO4, and evaporated. The resulting residue was purified by silica gel column chromatography (hexane:EtOAc = 3:1) to give the corresponding alcohol (26.6 mg, 54%) as a colorless oil and recovered starting material (5.8 mg, 9%). []D25.1 + 26.9 (*c* 1.33., CHCl3); max(film)/cm–1 3506, 2927, 1745, 1712, 1613, 1515, 1465, 1248, 1093, 1038, 820, 746; H (400 MHz, CDCl3) 7.25 (2 H, d, *J* 8.5 Hz), 7.21 (2 H, d, *J* 8.5 Hz), 7.12 (2 H, d, *J* 8.5 Hz), 6.83 (2 H, d, *J* 8.5 Hz), 6.80 (2 H, d, *J* 8.5 Hz), 6.79 (2 H, d, *J* 8.5 Hz), 6.54 (1 H, dq, *J* 9.5, 1.2 Hz), 5.84 (1 H, s), 5.27 (1 H, ddd, *J* 9.3, 3.4, 2.9 Hz), 5.00 (1 H, d, *J* 9.8 Hz), 4.84 (1 H, t, *J* 5.1 Hz), 4.77 (1 H, d, *J* 10.5 Hz), 4.60 (1 H, d, *J* 10.5 Hz), 4.47 (1 H, d, *J* 11.7 Hz), 4.43 (2 H, d, *J* 11.4 Hz), 4.42 (1 H, d, *J* 11.4 Hz), 4.41 (1 H, d, *J* 11.7 Hz), 4.32 (1 H, dd, *J* 9.3, 2.2 Hz), 4.05 (1 H, d, *J* 3.4 Hz), 3.94 (1 H, d, *J* 2.2 Hz), 3.78 (1 H, m), 3.78 (3 H, s), 3.77 (3 H, s), 3.77 (3 H, s), 3.73 (1 H, dd, *J* 11.3, 2.5 Hz), 2.91-2.78 (2 H, m), 1.84 (3 H, d, *J* 1.2 Hz), 1.81 (3 H, d, *J* 0.7 Hz), 1.73 (1 H, m), 1.68 (3 H, s), 1.63 (1 H, m), 1.43 (1 H, m), 1.36-1.08 (16 H, m), 1.10 (3 H, d, *J* 7.1 Hz), 0.99 (3 H, d, *J* 6.8 Hz), 0.93 (3 H, d, *J* 6.8 Hz), 0.88 (3 H, t, *J* 6.8 Hz); C (100 MHz, CDCl3) 171.3, 166.6, 159.3, 159.1, 159.1, 142.6, 135.0, 133.1, 132.3, 130.7, 130.4, 130.3, 130.2, 129.3, 129.2, 129.1, 127.7, 113.7, 113.7, 113.5, 82.9, 77.7, 77.5, 75.7, 73.5, 72.6, 72.5, 71.4, 67.8, 55.2, 55.2, 55.2, 38.3, 35.6, 34.5, 33.7, 31.9, 29.8, 29.7, 29.7, 29.6, 29.3, 27.3, 22.7, 19.3, 16.9, 15.5, 14.9, 14.7, 14.1, 12.6.

# To a solution of the alcohol (9.7 mg, 0.010 mmol) and pyridine (0.004 mL, 0.05 mmol) in dichloromethane (0.5 mL) was added Dess–Martin periodinane (8.7 mg, 0.021 mmol) at 0 ˚C. After stirred at room temperature for 30 min, the reaction mixture was diluted with EtOAc The organic layer was washed with saturated NaHCO3, 10% NaHSO3, and brine, dried over Na2SO4, and evaporated. The resulting residue was purified by silica gel column chromatography (hexane:EtOAc = 3:1) to give the corresponding ketone (9.0 mg, 93%) as a colorless oil. H (400 MHz, CDCl3) 7.25 (2 H, d, *J* 8.8 Hz), 7.16 (2 H, d, *J* 8.8 Hz), 7.10 (2 H, d, *J* 8.8 Hz), 6.81 (2 H, d, *J* 8.8 Hz), 6.81 (2 H, d, *J* 8.8 Hz), 6.80 (1 H, s), 6.78 (2 H, d, *J* 8.8 Hz), 6.67 (1 H, dq, *J* 9.3, 1.2 Hz), 5.30 (1 H, m), 4.87 (1 H, dq, *J* 7.0, 1.2 Hz), 4.78 (1 H, d, *J* 11.8 Hz), 4.53 (1 H, d, *J* 10.5 Hz), 4.45 (1 H, d, *J* 11.8 Hz), 4.43 (1 H, d, *J* 11.8 Hz), 4.39 (1 H, d, *J* 11.8 Hz), 4.36 (1 H, d, *J* 10.5 Hz), 4.18 (1 H, dd, *J* 9.5, 1.2 Hz), 3.78 (3 H, s), 3.77 (3 H, s), 3.77 (3 H, s), 3.75 (1 H, m), 3.73 (2 H, m), 3.68 (1 H, d, *J* 2.4 Hz), 3.64 (1 H, m), 2.84 (1 H, m), 1.90 (3 H, d, *J* 1.2 Hz), 1.83 (3 H, d, *J* 1.0 Hz), 1.79 (3 H, d, *J* 1.2 Hz), 1.44-1.10 (19 H, m), 1.22 (3 H, d, *J* 6.9 Hz), 1.01 (3 H, d, *J* 7.1 Hz), 0.88 (3 H, d, *J* 6.4 Hz), 0.87 (3 H, t, *J* 6.7 Hz).

To a solution of the ketone (14.5 mg, 0.0154 mmol) in dichloromethane (2.0 mL) was added BCl3 (0.070 mL, 0.070 mmol, 1.0 M in heptane) at –78 ˚C. After stirred at this temperature for 5 min, the reaction mixture was quenched with saturated NaHCO3 and poured into aqueous citric acid and EtOAc was added. The organic layer was separated, and the aqueous layer was extracted with EtOAc. The combined organic layer was washed with brine, dried over Na2SO4, and evaporated. The resulting residue was purified by preparative thin layer chromatography on silica gel (hexane:EtOAc = 1:1) to give macrocycled khafrefungin (**20**, 6.5 mg, 73%) as a colorless oil. []D25.1 +84 (*c* 0.16, CHCl3); max(film)/cm–1 3466, 2926, 2856, 1743, 1714, 1652, 1457, 1384, 1229, 1126, 1079, 1028, 741; H (400 MHz, CDCl3) 6.79 (1 H, dq, *J* 9.8, 1.2 Hz), 6.76 (1 H, d, *J* = 1.2 Hz), 5.28 (1 H, d, *J* 10.3 Hz), 5.08 (1 H, dt, *J* 9.3, 3.5 Hz), 4.76 (1 H, dq, *J* 7.8, 1.2 Hz), 4.17 (1 H, m), 4.10 (1 H, m), 3.98 (2 H, d, *J* 3.5 Hz), 3.73 (1 H, dq, *J* 9.8, 6.8 Hz), 3.26 (1 H, br s), 2.97 (1 H, br s), 2.88 (1 H, dq, *J* 6.8, 10.3 Hz), 2.56 (1 H, br s), 1.99 (3 H, d, *J* 1.2 Hz), 1.93 (3 H, d, *J* 1.2 Hz), 1.86 (3 H, d, *J* 1.2 Hz), 1.56 (1 H, m), 1.67 (18 H, m), 1.23 (3 H, d, *J* 6.8 Hz), 1.00 (3 H, d, *J* 6.8 Hz), 0.88 (3 H, d, *J* 6.8 Hz), 0.81 (3 H, d, *J* 6.8 Hz); C (100 MHz, CDCl3) 202.3, 172.1, 166.9, 143.6, 142.5, 142.4, 133.9, 132.2, 128.5, 85.1, 74.0, 69.8, 68.8, 62.5, 42.8, 36.0, 34.1, 33.0, 31.9, 29.9, 29.6, 29.6, 29.6, 29.3, 26.7, 22.7, 19.6, 16.1, 15.2, 14.5, 14.1, 14.0, 12.6; HRMS (ESI) calcd. for C33H53O8 (M-H)- 577.3741, found 577.3748.

**Synthesis of derivative 61**

**(2*R*,3*R*,4*R*)-1,3,4-Tris(4-methoxybenzyloxy)-5-(trityloxy)-2-pentanol 56**

To a stirred solution of diol **55** (5.13 g, 10.0 mmol) and triphenylmethyl chloride (4.18 g, 15.0 mmol) in dichloromethane (36 mL) was added a solution of triethylamine (2.53 g, 25.0 mmol) in dichloromethane (9 mL) at 0 °C. After stirring for 24 h at room temperature, water was added. After the phases were separated, the aqueous layer was extracted with EtOAc. The combined organic extract was washed with a 1 M aqueous HCl solution, water, and brine, dried over Na2SO4, and evaporated. The residue was purified by column chromatography on silica gel (hexane:EtOAc = 4:1) to give alcohol **56** (6.48 g, 86%) as a pale yellow oil. H (300 MHz, CDCl3) 7.46-7.38 (6 H, m), 7.34-7.17 (13 H, m), 6.96-6.91 (2 H, m), 6.89-6.78 (4 H, m), 6.76-6.68 (2 H, m), 4.64-4.35 (4 H, m), 4.30 (2 H, s), 3.95-3.82 (2 H, m), 3.79 (3 H, s), 3.79 (3 H, s), 3.77 (3 H, s), 3.68 (1 H, dd, *J* 10.3, 2.6 Hz), 3.56-3.38 (3 H, m), 3.25 (1 H, dd, *J* 9.5, 6.3 Hz), 2.70 (1 H, d, *J* 5.3 Hz);C (75 MHz, CDCl3) 159.22, 159.18, 159.07, 143.9, 130.25, 130.22, 130.1, 130.0, 129.8, 129.4, 128.6, 127.8, 127.0, 113.73, 113.68, 113.5, 87.0, 77.5, 77.3, 73.2, 72.9, 72.6, 70.9, 70.0, 63.1, 55.20, 55.19.

**(2*S*,3*R*,4*R*)-1,3,4-Tris(4-methoxybenzyloxy)-5-(trityloxy)-2-pentanol 57**

To a stirred solution of 4-nitrobenzoic acid(2.54 g, 15.2 mmol), triphenylphosphine (3.99 g, 15.2 mmol) in benzene (50 mL) was added alcohol **56** (5.73 g, 7.59 mmol) in benzene (30 mL) at room temperature. After adding diethyl azodicarboxylate (2.40 mL, 15.2 mmol) in benzene (30 mL), the mixture was stirred for 8 h at room temperature. The reaction was quenched with saturated NaHCO3 and the mixture was extracted with benzene. The organic extract was washed with water and brine, dried over Na2SO4, and evaporated. The residue was roughly purified by column chromatography on silica gel (hexane:EtOAc = 2:1) to give the correspondingester.

To a solution of the ester in dichloromethane (100 mL) was added diisobutylaluminum hydride (19.4 mL, 18.0 mmol, 0.93 M solution in hexane) at –78 °C. The mixture was stirred for 4 h at –78 °C, and warmed to room temperature. The reaction was quenched with methanol, and an aqueous Rochelle salt solution. The mixture was stirred vigorously until the resulting white slurry was completely dissolved. After the phases were separated, the aqueous layer was extracted with dichloromethane. The combined organic extract was washed with water and brine, dried over Na2SO4, and evaporated. The residue was purified by column chromatography on silica gel (hexane:EtOAc = 4:1) to give the alcohol **57** (2.88 g, 2 steps 55%).H(400 MHz, CDCl3) 7.55-7.40 (2 H, m), 7.33-7.15 (13 H, m), 7.10-7.03 (2 H, m), 6.89-6.73 (6 H, m), 4.82-4.30 (6 H, m), 3.85-3.74 (3 H, m), 3.80 (3 H, s), 3.780 (3 H, s), 3.777 (3 H, s), 3.43-3.25 (4 H, m); *m/z* (ESI) 777 (M+Na)+.

**(2*R*,3*R*,4*R*)-1,3,4-Tris(4-methoxybenzyloxy)-5-(*tert*-butyldimethylsiloxy)pentane-2-amine 58**

To a stirred solution of alcohol **57** (2.54 g, 3.36 mmol) in dichloromethane (20 mL) was added triethylamine (1.40 mL, 10.1 mmol) and methanesulfonyl chloride(0.598 g, 5.05 mmol) at 0 °C. After the mixture was stirred for 20 min at 0 °C, the reaction was quenched with 10% aqueous citric acid solution. The mixture was extracted with dichloromethane and the organic extract was washed with saturated NaHCO3 and brine, dried over Na2SO4, and evaporated. The residue was dissolved in dimethylformamide (15 mL) and sodium azide (2.18 g, 33.6 mmol) was added. After the reaction mixture was stirred for 60 h at 100 °C, the mixture was cooled to room temperature and water was added. The mixture was extracted with EtOAc, and the organic layer was washed with saturated NH4Cl, and brine, dried over Na2SO4, and evaporated. The residue was purified by column chromatography on silica gel (hexane:EtOAc = 4:1) to give the azide (1.43 g, 2 steps 55%) as a yellow oil.H (300 MHz, CDCl3) 7.60-7.20 (19 H, m), 7.00-6.65 (8 H, m), 4.70-4.25 (6 H, m), 3.90-3.64 (4 H, m), 3.77 (3 H, s), 3.76 (3 H, s), 3.75 (3 H, s), 3.57 (1 H, dd, *J* 10.0, 6.1 Hz), 3.39 (1 H, dd, *J* 9.6, 5.0 Hz), 3.20 (1 H, dd, *J* 9.5, 6.6 Hz);C (75 MHz, CDCl3) 159.22, 159.20, 159.18, 143.8, 130.3, 129.94, 129.88, 129.3, 128.6, 127.9, 127.1, 113.8, 113.7, 113.5, 87.1, 77.2, 74.2, 72.81, 72.79, 69.4, 62.6, 60.9, 55.2;*m*/*z* (ESI) 802 (M+Na)+.

To a stirred solution of the azide(2.91 g, 3.73 mmol) in methanol (30 mL) was added *p*-toluenesulfonic acid monohydrate (1.06 g, 5.60 mmol) at room temperature. After stirred for 1 h at room temperature, the reaction was quenched with saturated NaHCO3 at 0 °C. The mixture was extracted with EtOAc, and the organic layer was washed with brine, dried over Na2SO4, and evaporated. The residue was purified by column chromatography on silica gel (hexane:EtOAc = 2:1 to 1:1) to give the alcohol (1.25 g, 62%) as a yellow oil.H (400 MHz, CDCl3) 7.33-7.15 (6 H, m), 6.93-6.80 (6 H, m), 4.55 (2 H, s), 4.52 (2 H, s), 4.49 (2 H, s), 3.85-3.60 (7 H, m), 3.803 (3 H, s), 3.797 (3 H, s), 3.793 (3 H, m);C (100 MHz, CDCl3) 159.4, 159.35, 159.29, 130.1, 130.0, 129.74, 129.70, 129.66, 129.4, 128.6, 78.3, 77.5, 73.9, 73.0, 72.6, 69.2, 61.4, 61.3, 55.2; *m/z* (ESI) 560 (M+Na)+.

To a stirred solution of the alcohol(1.23 g, 2.29 mmol) in dimethylformamide (8 mL) was added imidazole (0.47 g, 6.87 mmol) at 0 °C. After adding *tert*-butyldimethylsilyl chloride (0.52 g, 3.44 mmol) in dimethylformamide (2 mL) at 0 °C, the mixture was stirred for 15 h at room temperature. The reaction was quenched with saturated NaHCO3, and the mixture was extracted with EtOAc. The organic layer was washed with brine, dried over Na2SO4, and evaporated. The residue was purified by column chromatography on silica gel (hexane:EtOAc = 6:1) to give thecorresponding TBS ether (1.34 g, 90%) as a colorless oil. H (400 MHz, CDCl3) 7.28-7.20 (4 H, m), 7.17-7.10 (2 H, m), 6.88-6.78 (6 H, m), 4.63-4.40 (6 H, m), 4.49 (2 H, s), 3.83-3.52 (7 H, m), 3.80 (3 H, s), 3.79 (3 H, s), 3.79 (3 H, m), 0.88 (9 H, s), 0.02 (3 H, s), 0.01 (3 H, s);C (100 MHz, CDCl3) 159.29, 159.27, 159.2, 130.5, 130.2, 130.0, 129.8, 129.3, 113.8, 113.69, 113.66, 78.7, 76.8, 74.2, 73.1, 72.9, 69.5, 62.1, 61.0, 55.24, 55.22, 25.0, 18.2, –5.4, –5.5; *m/z* (ESI) 674 (M+Na)+.

To a stirred solution of the TBS ether(1.28 g, 1.96 mmol) in tetrahydrofuran (40 mL) was added triphenylphosphine (5.14 g, 19.6 mmol), and the mixture was heated for 18 h at reflux. Water (10 mL) was added, and the mixture was heated for 4 h at reflux. After cooling to room temperature, tetrahydrofuran was evaporated, and EtOAc and brine were added to the mixture. The organic layer was separated, and the aqueous layer was extracted with EtOAc. The combined organic layer was dried over Na2SO4, and evaporated. The residue was purified by column chromatography on silica gel (hexane:EtOAc = 3:2 to benzene:MeOH = 9:1) to give the amine **58** (1.19 g, 97%) as a yellow oil.H (300 MHz, CDCl3) 7.38-7.22 (4 H, m), 7.20-7.13 (2 H, m), 6.90-6.78 (6 H, m), 4.66 (1 H, d, *J* 11.6 Hz), 4.52 (1 H, d, *J* 11.5 Hz), 4.50 (1 H, d, *J* 11.2 Hz), 4.42 (1 H, d, *J* 10.3 Hz), 4.40 (2 H, s), 3.83-3.65 (3 H, m), 3.80 (3 H, s), 3.79 (3 H, s), 3.79 (3 H, m), 3.57-3.40 (3 H, m), 3.12 (1 H, m), 0.90 (9 H, s), 0.043 (3 H, s), 0.037 (3 H, s);C (75 MHz, CDCl3) 159.20, 159.17, 159.1, 130.7, 130.5, 129.83, 129.80, 129.37, 113.7, 113.6, 79.5, 78.6, 73.6, 72.8, 72.3, 72.1, 63.0, 55.24, 55.22, 51.7, 25.9, 18.2, –5.36, –5.43.

**(2*R*,3*R*,4*R*)-*N*-(2,4-Dimethoxybenzyl)-1,3,4-tris(4-methoxybenzyloxy)-5-(*tert*-butyl-dimethylsiloxy)pentane-2-amine 59**

To a stirred solution of amine **58** (306 mg, 0.490 mmol) in toluene (3 mL) was added molecular sieves 4A (242 mg) at room temperature. After adding 2,4-dimethoxybenzaldehyde (79.5 mg, 0.478 mmol), the reaction mixture was heated for 13 h at reflux. The mixture was cooled to room temperature and the solvent was evaporated. The residue was dissolved in methanol and sodium borohydride (27.6 mg, 0.730 mmol) was added at 0 °C. After stirring for 1.5 h at 0 °C, the mixture was filtered through Celite, and evaporated. The residue was purified by column chromatography on silica gel (hexane:*i*-PrNH2 = 15:1) to give the amine **59** (351 mg, 92%) as a colorless oil.H (400 MHz, CDCl3) 7.27-7.07 (4 H, m), 6.87-6.75 (2 H, m), 6.42-6.37 (2 H, m), 4.60 (1 H, d, *J* 12.0 Hz), 4.53 (1 H, d, *J* 12.0 Hz), 4.52 (2 H, s), 4.39 (2 H, s), 3.86-3.58 (6 H, m), 3.793 (3 H, s), 3.784 (3 H, s), 3.776 (3 H, s), 3.77 (3 H, s), 3.69 (3 H, s), 3.60-3.54 (1 H, dd, *J* 5.8, 1.4 Hz), 2.97 (1 H, m), 0.87 (9 H, s), –0.01 (3 H, s), –0.02 (3 H, s);C (100 MHz, CDCl3) 159.8, 158.99, 158.95, 158.44, 130.7, 131.3, 131.2, 130.8, 130.0, 129.8, 129.7, 129.1, 121.7, 113.6, 113.5, 103.5, 98.3, 79.8, 77.7, 73.6, 73.1, 72.7, 68.4, 63.5, 57.8, 55.3, 55.23, 55.21, 55.10, 46.4, 25.9, 18.2, –5.38, –5.44;*m/z* (ESI) 776 (M+H)+.

**(2*E*,4*R*,5*S*,6*E*,8*E*,10*S*,11*R*,12*S*)-*N*-(2,4-Dimethoxybenzyl)-*N*-[(1*R*,2*S*,3*R*)-1-[(4-**

**methoxybenzyloxy)methyl]-2,3-bis(4-methoxybenzyloxy)-4-(*tert*-butyldimethyl-**

**siloxy)butyl]-2,4,6,8,10,12-hexamethyl-5-(triethylsiloxy)-11-(4-methoxybenzyloxy) -2,6,8-docosatrieneamide 60**

To a stirred solution of carboxylic acid (59.4 mg, 0.0867 mmol), amine **59** (102 mg, 0.168 mmol), and diisopropylethylamine (35.4 mg, 0.260 mmol) in dichloromethane (1.5 mL) was added bromotripyrrolidinophosphonium hexafluorophosphate (PyBrop, 61.1 mg, 0.130 mmol) at 0 °C. The reaction mixture was stirred for 11 h at 0 °C and the reaction was quenched with saturated NaHCO3. The mixture was extracted with dichloromethane and the organic layer was washed with brine, dried over Na2SO4, and evaporated. The resulting residue was purified by preparative thin layer chromatography on silica gel (hexane:EtOAc = 3:1) to give the amide **60** (56.2 mg, 45%) as a colorless oil.H (400 MHz, CDCl3) 7.30-6.70 (17 H, m), 6.40-6.23 (2 H, m), 5.71 (1 H, s), 5.28 (1 H, d, *J* 12.0 Hz), 5.19 (1 H, d, *J* 9.3 Hz), 4.70-4.20 (11 H, m), 4.05 (2 H, d, *J* 4.4 Hz), 3.90-3.45 (5 H, m), 3.79 (3 H, s), 3.77 (3 H, s), 3.77 (3 H, s), 3.77 (3 H, s), 3.76 (3 H, s), 3.64 (3 H, s), 2.94 (1 H, m), 2.55 (2 H, m), 1.80-1.20 (19 H, m), 1.77 (3 H, s), 1.65 (3 H, s), 1.50 (3 H, s), 1.00-0.80 (21 H, m), 0.89 (9 H, s), 0.54 (6 H, q, *J* 7.8 Hz), 0.03 (3 H, s), 0.01 (3 H, s).

**(2*E*,4*R*,6*E*,8*E*,10*S*,11*R*,12*S*)-*N*-[(3*R*,4*R*,5*S*)-4,5-Dihydroxy-6-oxotetrahydro-2H-**

**pyran-3-yl]-2,4,6,8,10,12-hexamethyl-5-oxo-11-hydroxy-2,6,8-docosatrieneamide 61**

To a solution of amide **60** (90.7 mg, 0.0628 mmol) in THF (4.4 mL) was added a 1 M aqueous HCl solution (1.2 mL) at room temperature. After stirred for 12 h at room temperature, the reaction mixture was quenched with saturated NaHCO3, and extracted with EtOAc. The combined organic layer was washed with brine, dried over Na2SO4, and evaporated. The resulting residue was purified by preparative thin layer chromatography (hexane:EtOAc = 1:1) to give the diol (66.8 mg, 88%) as a colorless oil.

To a solution of the diol (66.8 mg, 0.0550 mmol) in dichloromethane (8 mL) was added Dess–Martin periodinane (93.4 mg, 0.220 mmol) and pyridine (21.6 mg, 0.273 mmol) in dichloromethane (2 mL) at 0 ˚C. After stirred at room temperature for 3 h, the reaction mixture was diluted with dichloromethane. Saturated NaHCO3 was added to the reaction mixture, and the organic layer was separated. The aqueous layer was extracted with dichloromethane. The organic layer was washed with 1 N Na2S2O3, and brine, dried over Na2SO4 and evaporated. The resulting residue was purified by preparative thin layer chromatography on silica gel (hexane:EtOAc = 1:1) to give the aldehyde (40.1 mg, 60%) as a colorless oil.

To a solution of the aldehyde (50.9 mg, 0.0420 mmol) in *tert*-butyl alcohol (0.41 mL) and 2-methyl-2-butene (0.26 mL) was added a mixture of sodium chlorite (68.5 mg) and sodium dihydrogenphosphate (68.5 mg) in water (0.33 mL). After stirred for 3 h at room temperature, the reaction mixture was diluted with water. The mixture was extracted with EtOAc and the organic layer was washed with brine, dried over Na2SO4, and evaporated. The resulting residue was purified by preparative thin layer chromatography on silica gel (CHCl3 : MeOH = 15:1) to give the carboxylic acid (5.1 mg, 10%) as a colorless oil.

To a solution of the carboxylic acid (5.1 mg, 0.0432 mmol) and anisole (23.6 mg, 0.218 mmol) in dichloromethane (0.9 mL) was added trifluoroacetic acid (0.10 mL) in dichloromethane (0.90 mL) at 0 ˚C. After stirred at this temperature for 2 h, the reaction mixture was quenched with saturated NaHCO3. The mixture was extracted with EtOAc and the organic layer was washed with brine, dried over Na2SO4, and evaporated. The resulting residue was purified by preparative thin layer chromatography on silica gel (CHCl3:MeOH = 10 : 1) to give amide **61** (1.0 mg, 40%) as a colorless oil. H (500 MHz; CD3OD) 6.94 (1 H, s), 6.31 (1 H, d *J* 9.5 Hz), 5.60 (1 H, d *J* 8.5 Hz), 4.40-4.30 (1 H, m), 4.25-4.20 (2 H, m), 4.13 (1 H, m), 4.05 (1 H, m), 3.82-3.75 (1 H, m), 3.25 (1 H, m), 2.80-2.70 (1 H, m), 1.93 (3 H, s), 1.93 (3 H, s), 1.91 (3 H, s), 1.59 (1 H, m), 1.20 (3 H, *J* 7.0 Hz), 1.45-1.15 (18 H, m), 1.00 (3 H, d, *J* 6.7 Hz), 0.93 (3 H, d, *J* 7.3 Hz), 0.89 (3 H, t, *J* 7.2 Hz).

**Synthesis of derivative 25**

**(2*R*,3*R*,4*R*)-1,3,4-Tris(4-methoxybenzyloxy)-5-(tert-butyldiphenylsiloxy)-2-**

**pentanol 63**

To a stirred solution of diol **55** (2.00 g, 3.90 mmol) in dimethylformamide (20 mL) was added imidazole (0.896 g, 11.9 mmol) in dimethylformamide (10 mL) at room temperature. After adding *tert*-butyldiphenylsilyl chloride (1.61 g, 5.85 mmol) at 0 °C, the mixture was stirred for 3 h at room temperature. The mixture was diluted with EtOAc, and the organic layer was washed with ice water, saturated NaHCO3, and brine, dried over Na2SO4, and evaporated. The residue was purified by column chromatography on silica gel (hexane:EtOAc = 4:1) to givealcohol **63** (2.43 g, 81%) as a colorless oil. H (400 MHz, CDCl3) 7.64 (4 H, m), 7.45-7.33 (6 H, m), 7.23 (2 H, d, *J* 8.6 Hz), 7.14 (2 H, d, *J* 8.6 Hz), 7.05 (2 H, d, *J* 8.6 Hz), 6.85 (2 H, d, *J* 8.6 Hz), 6.80 (2 H, d, *J* 11.5 Hz), 6.77-6.73 (4 H, m), 4.53 (1 H, d, *J* 8.6 Hz), 4.48-4.39 (5 H, m), 3.93 (1 H, ddd, *J* 8.9, 7.3, 5.8 Hz), 3.92-3.74 (4 H, m), 3.79 (3 H, s), 3.78 (3 H, s), 3.76 (3 H, s), 3.71 (1 H, dd, *J* 7.6, 2.4 Hz), 3.53 (1 H, dd, *J* 7.3, 4.7 Hz), 1.05 (9 H, m); c (100 MHz, CDCl3) 159.3, 159.3, 159.2, 135.7, 135.6, 133.4, 130.41, 130.38, 130.29, 129.85, 129.8, 129.73, 129.72, 129.45, 113.8, 113.7, 113.6, 78.8, 77.2, 73.4, 73.0, 72.7, 71.0, 70.3, 63.0, 55.3, 55.2, 26.9, 19.2; *m/z* (ESI) 773 (M+Na)+.

**(2*S*,3*R*,4*R*)-1,3,4-Tris(4-methoxybenzyloxy)-5-(*tert*-butyldiphenylsiloxy)-2-pentanol 64**

To a solution of 4-nitrobenzoic acid(10.3 g, 60.9 mmol), triphenylphosphine (16.3 g, 61.0 mmol), and alcohol **63** (4.69 g, 6.13 mmol) in THF (250 mL) at room temperature. After adding diisopropyl azodicarboxylate (12.0 mL, 60.9 mmol) at 0 °C, the mixture was stirred for 4 h at room temperature. The reaction was quenched with saturated NaHCO3 and the mixture was extracted with EtOAc. The organic extract was washed with water and brine, dried over Na2SO4, and evaporated. The residue was purified by column chromatography on silica gel (hexane:EtOAc = 2:1) to give the ester. H (400 MHz, CDCl3) 8.17 (2 H, d, *J* 8.6 Hz), 8.01 (2 H, d, *J* 8.6 Hz), 7.64-7.60 (4 H, m), 7.44-7.39 (2 H, m), 7.35-7.31 (4 H, m), 7.15 (2 H, d, *J* 8.5 Hz), 7.10-7.06 (4 H, m), 6.82 (4 H, d, *J* 8.5 Hz), 6.71 (2 H, d, *J* 8.5 Hz), 5.56 (1 H, m), 4.59-4.18 (6 H, m), 4.11 (1 H, dd, *J* 5.6, 3.9 Hz), 3.88 (1 H, dd, *J* 10.5, 5.6 Hz), 3.80-3.64 (2 H, m), 3.79 (3 H, s), 3.77 (3 H, s), 3.73 (3 H, s), 3.62 (1 H, m), 3.58 (1 H, dd, *J* 10.7, 4.0 Hz), 3.45 (1 H, dd, *J* 10.7, 5.6 Hz), 1.02 (9 H, s);c (100 MHz, CDCl3) 163.9, 159.23, 159.17, 150.4, 135.6, 133.2, 130.8, 13

To a solution of the ester in dichloromethane (100 mL) was added diisobutylaluminum hydride (27.6 mL, 25.7 mmol, 0.93 M solution in hexane) at –78 °C. The mixture was stirred for 4 h at –78 °C, and warmed to 0 °C. The reaction was quenched with methanol, and an aqueous Rochelle salt solution. The mixture was stirred vigorously until the resulting white slurry was completely dissolved. After the phases were separated, the aqueous layer was extracted with dichloromethane. The combined organic extract was washed with water and brine, dried over Na2SO4, and evaporated. The residue was purified by column chromatography on silica gel (hexane:EtOAc = 6:1 to 1:1) to give alcohol **64** (2.67 g, 2 steps 57%). H (400 MHz, CDCl3) 7.69-7.66 (4 H, m), 7.51-7.32 (6 H, m), 7.20 (2 H, d, *J* 8.6 Hz), 7.14 (2 H, d, *J* 8.6 Hz), 7.11 (2 H, d, *J* 8.6 Hz), 6.85-6.78 (6 H, m), 4.61 (1 H, d, *J* 11.5 Hz), 4.52 (1 H, d, *J* 11.5 Hz), 4.45-4.34 (4 H, m), 3.95 (1 H, m), 3.86-3.76 (3 H, m), 3.784 (3 H, s), 3.784 (3 H, s), 3.776 (3 H, s), 3.68 (1 H, dd, *J* 7.3, 4.7 Hz), 3.37 (2 H, m), 1.05 (9 H, s); c (100 MHz, CDCl3) 159.20, 159.16, 159.1, 135.7, 135.6, 133.32, 133.27, 130.5, 130.2, 129.69, 129.65, 129.5, 129.3, 127.69, 127.65, 113.7, 113.6, 79.9, 77.5, 74.2, 72.8, 72.3, 70.9, 70.0, 63.0, 55.2, 26.8, 19.1.

**(2*R*,3*R*,4*R*)-1,3,4-Tris(4-methoxybenzyloxy)-5-(*tert*-butyldiphenylsiloxy)-2-pentanethiol 65**

To a stirred solution of alcohol **64** (370 mg, 0.484 mmol) in dichloromethane (5 mL) was added triethylamine (0.34 mL, 2.42 mmol) and methanesulfonyl chloride(0.11 mL, 1.45 mmol) at 0 °C. After the mixture was stirred for 1 h at 0 °C, the reaction was quenched with 10% aqueous citric acid solution. The mixture was extracted with dichloromethane and the organic layer was washed with saturated NaHCO3 and brine, dried over Na2SO4, and evaporated to give the corresponding product (345 mg, 85%) which was used without further purification. H (300 MHz, CDCl3) 7.67-7.60 (4 H, m), 7.60-7.48 (6 H, m), 7.17 (4 H, d, *J* 11.1 Hz), 7.02 (2 H, d, *J* 11.1 Hz), 6.86-6.76 (6 H, m), 4.89-4.84 (1 H, m), 4.60 (2 H, s), 4.43-4.15 (4 H, m), 4.02 (1 H, m), 3.86-3.73 (2 H, m), 3.79 (3 H, s), 3.78 (3 H, s), 3.76 (3 H, s), 3.59 (1 H, ddd, *J* 5.1, 3.9, 2.7 Hz), 3.55-3.52 (1 H, m), 3.37 (1 H, dd, *J* 11.5, 5.8 Hz), 2.90 (3 H, s), 1.04 (9 H, s); C (75 MHz, CDCl3) 159.32, 159.28, 159.26, 135.7, 135.6, 133.2, 130.03, 130.00, 129.94, 129.80, 129.75, 129.6, 129.4, 127.8, 127.7, 113.8, 113.73, 113.71, 82.3, 76.4, 74.6, 72.9, 72.0, 68.9, 61.9, 60.4, 55.24, 55.20, 38.2, 26.8, 19.1, 14.2;*m/z* (ESI) 851 (M+Na)+.

To a stirred solution of the mesylate (120 mg, 0.140 mmol) in toluene (1.4 mL) was added molecular sieves 4A (120 mg), and the mixture was stirred for 20 min at room temperature. After heating at reflux, potassium thioacetate (128 mg, 1.12 mmol) in dimethylformamide (0.40 mL) was added to the mixture. After stirred for 11 h at reflux, the mixture was cooled to room temperature and filtered. Saturated NaHCO3 was added and the mixture was extracted with EtOAc. The organic layer was washed with brine, dried over Na2SO4, and evaporated. The resulting residue was purified by preparative thin layer chromatography on silica gel (benzene:EtOAc = 10:1) to give the corresponding thioacetate (46.1 mg, 56%) as a brown oil. H (400 MHz, CDCl3) 7.68-7.62 (6 H, m), 7.45-7.29 (4 H, m), 7.18 (2 H, d, *J* 8.5 Hz), 7.11 (4 H, d, *J* 8.6 Hz), 6.84-6.74 (6 H, m), 4.59-4.29 (6 H, m), 4.24 (1 H, dd, *J* 6.1, 5.6 Hz), 4.04 (dd, 1 H, *J* 5.9. 3.8 Hz), 3.80-3.69 (2 H, m), 3.774 (3 H, s), 3.768 (3 H, s), 3.75 (3 H, s), 3.60 (1 H, dd, *J* 10.0, 4.9 Hz), 3.51 (1 H, dd, *J* 10.0, 6.6 Hz), 2.30 (3 H, s), 1.03 (9 H, s); c (100 MHz, CDCl3) 195.5, 159.1, 135.68, 135.66, 135.6, 133.41, 133.36, 130.4, 130.2, 130.0, 129.7, 129.6, 129.2, 127.7, 113.7, 113.6, 113.5, 79.1, 77.2, 73.5, 72.6, 72.4, 69.1, 63.0, 55.22, 55.18, 44.3, 30.6, 26.8, 19.1; *m/z* (ESI) 809 (M+H)+.

To a stirred solution of the thioacetate (339 mg, 0.419 mmol) in diethyl ether (3 mL) was added lithium aluminum hydride (80.1 mg, 2.11 mmol) at 0 °C. After stirred for 2 h at the temperature, the reaction was quenched with 1% aqueous hydrochloric acid. The organic layer was separated, and the aqueous layer was extracted with diethyl ether. The combined organic layer was washed with saturated NaHCO3, and brine, dried over Na2SO4, and evaporated. The resulting residue was purified by column chromatography on silica gel (hexane:EtOAc = 4:1) to give thiol **65** (283 mg, 88%) as a yellow solid.H (300 MHz, CDCl3) 7.70-7.60 (4 H, m), 7.48-7.30 (6 H, m), 7.28-7.22 (2 H, m), 7.15-7.05 (4 H, m), 6.88-6.68 (6 H, m), 4.55-4.47 (3 H, m), 4.45 (2 H, s), 4.33 (1 H, d, *J* 11.5 Hz), 4.05-3.95 (1 H, m), 3.87-3.72 (4 H, m), 3.79 (3 H, s), 3.77 (3 H, s), 3.75 (3 H, s), 3.61 (1 H, dd, *J* 9.4, 3.3 Hz), 3.18 (1 H, ddd, *J* 12.8, 9.2, 3.7 Hz), 1.79 (1 H, d, *J* 9.3 Hz), 1.06 (9 H, s);C (75 MHz, CDCl3) 159.2, 159.1, 135.7, 135.6, 133.4, 130.7, 130.6, 130.2, 129.9, 129.8, 129.73, 129.68, 129.2, 127.7, 113.7, 113.7, 113.6, 80.4, 78.2, 74.5, 72.7, 71.2, 63.1, 55.2, 40.5, 26.9, 19.1.

***S*-[(1*R*,2*S*,3*R*)-1-[(4-Methoxybenzyloxy)methyl]-2,3-bis(4-methoxybenzyloxy)-4-(*tert*-butyldiphenylsiloxy)butyl] (2*E*,4*R*,5*R*,6*E*,8*E*,10*S*,11*R*,12*S*)-2,4,6,8,10,12-hexa-methyl-5-(triphenylsiloxy)-11-(4-methoxybenzyloxy)-2,6,8-docosatrienethioate 66**

To a solution of the carboxylic acid **67** (205 mg, 0.247 mmol) and thiol **2** (202 mg, 0.297 mmol) in dichloromethane (2 mL) was added *N*,*N*-dimethylaminopyridine (150 mg, 1.24 mmol) at room temperature. To the stirred solution was added 1-(3-dimethylaminopropyl)-3-ethylcarbodiimide hydrochloride (EDCI•HCl, 142 mg, 0.741 mmol), and the mixture was heated for 1.5 h at reflux. After the mixture was cooled to room temperature, the reaction was quenched with an aqueous ammonium chloride solution. The mixture was extracted with EtOAc, and the organic layer was washed with saturated NaHCO3 and brine, dried over Na2SO4, and evaporated. The residue was purified by column chromatography on silica gel (hexane:EtOAc = 3:1) to give thioester **66** (240 mg, 62%) as a colorless oil. H (400 MHz, CDCl3) 7.70-7.48 (10 H, m), 7.47-6.97 (23 H, m), 6.90-6.60 (8 H, m), 6.64 (1 H, d, *J* 9.8 Hz), 5.52 (1 H, s), 5.14 (1 H, d, *J* 9.5 Hz), 4.55-4.23 (8 H, m), 4.04 (1 H, dd, *J* 4.2, 4.2 Hz), 3.95 (1 H, d, *J* 8.0 Hz), 3.85-3.67 (5 H, m), 3.78 (3 H, s), 3.75 (3 H, s), 3.73 (3 H, s), 3.72 (3 H, s), 3.65 (1 H, dd, *J* 5.0, 5.0 Hz), 3.03 (1 H, dd, *J* 5.1, 5.1 Hz), 2.94-2.80 (1 H, m), 2.74-2.60 (1 H, m), 1.95 (3 H, s) 1.65 (3 H, s), 1.65-1.10 (19 H, m), 1.53 (3 H, s), 1.02 (9 H, s), 0.96 (3 H, d, *J* 6.6 Hz), 0.93 (3 H, d, *J* 6.8 Hz), 0.87 (3 H, t, *J* 6.7 Hz), 0.81 (3 H, d, *J* 6.8 Hz);C (75 MHz, CDCl3) 193.1, 159.0, 158.91, 158.85, 144.1, 135.6, 135.0, 134.4, 133.8, 133.4, 131.7, 131.1, 130.73, 130.65, 130.4, 129.8, 129.7, 129.6, 129.5, 129.1, 128.9, 127.6, 113.6, 113.54, 113.45, 87.1, 84.4, 80.2, 78.3, 74.4, 73.6, 72.9, 72.5, 69.4, 63.6, 55.1, 44.2, 38.5, 36.1, 35.7, 34.2, 31.9, 30.0, 29.7, 29.3, 27.3, 26.8, 22.7, 19.1, 18.4, 16.8, 16.5, 14.8, 14.1, 13.2, 13.0.

**(2*S*,3*S*,4*R*)-2,3,5-Trihydroxy-4-[[(2*E*,4*R*,6*E*,8*E*,10*S*,11*R*,12*S*)-1,5-dioxo-2,4,6,8,10,12-hexamethyl-11-hydroxy-2,6,8-docosatrienyl]thio]pentanoic acid 25**

To a solution of the thioester **66** (138 mg, 0.152 mmol) in tetrahydrofuran (9 mL) was added tetrabutylammonium fluoride (1.52 mL, 1.52 mmol, 1 M solution in THF) at room temperature. Acetic acid (131 L, 2.28 mmol) was added, and the mixture was stirred for 4 h at 50 °C. The reaction was quenched with saturated NaHCO3 and the mixture was extracted with EtOAc. The organic layer was washed with brine, dried over Na2SO4, and evaporated. The residue was purified by column chromatography on silica gel (hexane:EtOAc = 2:1 to 3:2) to give the co129.743, 130.65, 130.4, 129.83raphy on analysis) 00000000000000000000000000000000000000000000000000000000000000000000000000000diol (130 mg, 79%) as a colorless oil.H (300 MHz, CDCl3) 7.28-7.14 (8 H, m), 6.90-6.77 (8 H, m), 6.66 (1 H, dd, *J* 9.5, 1.1 Hz), 5.87 (1 H, s), 5.40 (1 H, d, *J* 9.7 Hz), 4.66-4.34 (8 H, m), 4.24-4.14 (1 H, s), 3.92 (1 H, dd, *J* 4.7, 4.7 Hz), 3.86-3.54 (5 H, m), 3.78 (3 H, s), 3.78 (3 H, s), 3.78 (3 H, s), 3.77 (3 H, s), 3.08 (1 H, dd, *J* 5.3, 5.3 Hz), 2.75 (1 H, m), 2.48 (1 H, m), 2.22 (1 H, m), 1.93 (3 H, d, *J* 1.1 Hz) 1.77 (3 H, d, *J* 0.9 Hz), 1.75 (3 H, s), 1.70-1.20 (19 H, m), 1.01 (3 H, d, *J* 6.8 Hz), 0.94 (3 H, d, *J* 6.6 Hz), 0.91 (3 H, d, *J* 6.8 Hz), 0.88 (3 H, t, *J* 7.0 Hz);C (75 MHz, CDCl3) 193.3, 159.21, 159.18, 159.16, 158.9, 143.7, 136.6, 134.4, 134.1, 133.0, 131.6, 131.1, 130.4, 130.2, 130.0, 129.8, 129.3, 129.0, 113.7, 113.5, 87.2, 82.8, 79.5, 79.4, 74.4, 73.6, 72.6, 72.4, 68.9, 62.0, 55.2, 44.0, 37.4, 36.2, 35.7, 34.1, 31.9, 30.0, 29.63, 29.61, 29.3, 27.3, 22.6, 20.7, 18.4, 17.1, 16.6, 14.8, 14.1, 14.0, 12.9, 12.6; *m/z* (ESI) 1081 (M+H)+.

To a solution of the diol (127 mg, 0.117 mmol) in dichloromethane (5 mL) was added Dess–Martin periodinane (201 mg, 0.472 mmol) and pyridine (46.4 mg, 0.587 mmol) in dichloromethane (10 mL) at 0 ˚C. After stirred at room temperature for 4 h, the reaction was quenched with saturated NaHCO3. The mixture was extracted with dichloromethane, and the organic layer was washed with 1 N Na2S2O3, and brine, dried over Na2SO4, and evaporated. The resulting residue was purified by preparative thin layer chromatography on silica gel (hexane:EtOAc = 3:1) to give the aldehyde (40.3 mg, 31%) as a colorless oil.

To a solution of the aldehyde (35.4 mg, 0.0329 mmol) in *tert*-butyl alcohol (0.32 mL) and 2-methyl-2-butene (0.20 mL) was added a mixture of sodium chlorite (65.7 mg) and sodium dihydrogenphosphate (65.8 mg) in water (0.32 mL). After stirred for 6 h at room temperature, the reaction mixture was diluted with EtOAc and H2O. The organic layer was separated, and the aqueous layer was extracted with EtOAc. The combined organic layer was washed with 10% NaHSO3 and brine, dried over Na2SO4, and evaporated. The resulting residue was purified by preparative thin layer chromatography on silica gel (CHCl3:MeOH = 15:1) to give the carboxylic acid (21.3 mg, 59%) as a colorless oil.

# To a solution of the carboxylic acid (4.7 mg, 0.0043 mmol) in dichloromethane (0.2 mL) was added BCl3 (0.035 mL, 0.0344 mmol, 1.0 M in heptane) at –78 ˚C. After stirred at this temperature for 5 min, the reaction mixture was quenched with saturated NaHCO3, and aqueous citric acid and EtOAc were added to the mixture. The organic layer was separated, and the aqueous layer was extracted with EtOAc. The combined organic layer was washed with brine, dried over Na2SO4, and evaporated. The resulting residue was purified by preparative thin layer chromatography (CHCl3:MeOH:H2O = 3:1:0.1) to give derivative 25 (0.8 mg, 30%). H (400 MHz; CD3OD) 7.09 (1 H, s), 6.76 (1 H, d, *J* 10.5 Hz), 5.74 (1 H, d, *J* 9.3 Hz), 4.45-4.35 (1 H, m), 4.21 (1 H, dd, *J* 1.9 and 5.6), 4.12-4.05 (1 H, m), 3.95-3.75 (2 H, m), 3.63 (1 H, m), 3.25 (1 H, m), 2.76 (1 H, m), 1.97 (3 H, s), 1.94 (3 H, d, *J* 1.0 Hz), 1.90 (3 H, d, *J* 1.0 Hz), 1.70-50 (1 H, m), 1.21 (3 H, d, *J* 6.8 Hz), 1.45-1.15 (18 H, m), 1.01 (3 H, d, *J* 6.6 Hz), 0.92 (3 H, d, *J* 6.6 Hz), 0.89 (3 H, t, *J* 6.7 Hz).

# Synthesis of derivative 26

# (1*E*,3*R*,4*R*,5*E*)-1-Iodo-2,4,6-trimethyl-3-(triphenylsiloxy)-7-bromo-1,5-heptadiene 68

# To a solution of alcohol (11) (1.00 g, 1.81 mmol) in dichloromethane (18 mL) was added tetrabromomethane (900 mg, 2.71 mmol) followed by triphenylphosphine (712 mg, 2.71 mmol) at 0 ˚C. After stirred at this temperature for 10 min, the reaction mixture was directly purified by silica gel column chromatography (hexane:EtOAc = 20:1) to give the corresponding bromide (68) (1.10 g, 98%) as a colorless oil. []D19.6 +32.4 (*c* 0.920 in CHCl3); max(film)/cm–1 3068, 2967, 1428, 1117, 1065;H (400 MHz, CDCl3) 7.55 (6 H, dd, *J* 8.0, 1.5 Hz), 7.41 (3 H, tt, *J* 7.1, 1.5 Hz), 7.36 (6 H, d, *J* 8.0, 7.1 Hz), 5.87 (1 H, s), 5.23 (1 H, d, *J* 7.3 Hz), 4.07 (1 H, d, *J* 7.8 Hz), 3.79 (2 H, s), 2.65 (1 H, m), 1.74 (3 H, s), 1.72 (3 H, s), 0.73 (3 H, d, *J* 6.8 Hz); C (100 MHz, CDCl3) 147.7, 135.6, 133.9, 133.9, 132.4, 130.0, 127.7, 82.2, 80.9, 41.4, 37.8, 19.7, 16.6, 15.0.

# (1*E*,3*R*,4*R*,5*E*,9*R*,10*R*,11*R*)-1-Iodo-2,4,6-trimethyl-3-(triphenylsiloxy)-9-[(4-

# methoxybenzyloxy)methyl]-10,11-bis(4-methoxybenzyloxy)-12-(*tert*-butyldimethyl-siloxy)-8-oxa-1,5-dodecadiene 69

# To a solution of the alcohol (588 mg, 0.939 mmol) in dichloromethane (4.0 mL) at 0 ˚C was added molecular sieves 4A. After stirring at this temperature for 30 min, to the reaction mixture was added 2,6-dibutylpyridine (0.264 mL, 1.18 mmol), silver triflate (241 mg, 0.938 mmol) and a solution of the bromide (68) (483 mg, 0.738 mmol) in dichloromethane (2.0 mL). The reaction mixture was stirred at 0 ˚C for 30 min and then diluted with EtOAc and filtered through Celite The combined organic layer was washed with 0.5 M KHSO4, saturated NaHCO3, and brine, dried over NaSO4, and evaporated.　　The resulting residue was purified by silica gel column chromatography (hexane:EtOAc = 4:1) to give the corresponding ether (69) (369 mg, 41%) as a colorless oil. H (400 MHz, CDCl3) 7.57 (6 H, dd, *J* 7.8, 1.4 Hz), 7.41 (3 H, tt, *J* 7.3, 1.4 Hz), 7.36 (6 H, d, *J* 7.8, 7.3 Hz), 7.25 (2 H, d, *J* 8.6 Hz), 7.24 (2 H, d, *J* 8.6 Hz), 7.20 (2 H, d, *J* 8.6 Hz), 6.84 (2 H, d, *J* 8.6 Hz), 6.83 (2 H, d, *J* 8.6 Hz), 6.83 (2 H, d, *J* 6.8 Hz), 5.85 (1 H, s), 5.12 (1 H, d, *J* 9.5 Hz), 4.61 (1 H, d, *J* 11.5 Hz), 4.60-4.42 (5 H, m), 4.46 (2 H, s), 4.07 (1 H, d, *J* 7.6 Hz), 3.93 (1 H, d, *J* 11.2 Hz), 3.82-3.55 (6 H, m), 3.80 (3 H, s), 3.78 (3 H, s), 3.78 (3 H, s), 2.70 (1 H, m), 1.72 (3 H, s), 1.67 (3 H, s), 0.89 (9 H, s), 0.75 (3 H, d, *J* 6.8 Hz), 0.02 (3 H, s), 0.01 (3 H, s); C (100 MHz, CDCl3) 159.0, 148.0, 135.7, 135.5, 134.1, 133.6, 131.2, 130.9, 130.6, 130.4, 129.9, 129.8, 129.4, 129.2, 127.7, 113.6, 113.5, 113.5, 82.3, 80.4, 79.7, 78.4, 77.9, 76.2, 73.7, 73.1, 72.9, 69.2, 63.2, 55.2, 55.2, 55.2, 37.3, 25.9, 20.0, 18.1, 16.9, 14.5, ­–5.4; HRMS (ESI) calcd. for C63H83NO9Si2I (M+NH4)+ 1180.4651, found 1080.4652.

# (2*R*,3*R*,4*R*,7*E*,9*R*,10*R*,11*E*,13*E*,15*S*,16*R*,17*S*)-2,3,16-Tris(4-methoxybenzyloxy)-4-

# [(4-methoxybenzyloxy)methyl]-7,9,11,13,15,17-hexamethyl-5-oxa-7,11,13-

# heptacosatriene-1,10-diol 70

# To a solution of alkyne 3 (343 mg, 0.889 mmol) in THF (3.6 mL) was added 9-BBN (3.56 mL, 1.78 mmol, 0.5 M in THF) at 0 ˚C. After stirring at room temperature for 12 h, a solution of the iodine (69) (687 mg, 0.593 mmol) in DMF (3.6 mL), H2O (3.6 mL), K3PO4 (756 mg, 3.56 mmol), and PdCl2(dppf) (97.0 mg, 0.119 mmol) were added and stirred at 65 ˚C for 30 min. The reaction mixture was cooled to room temperature, diluted with EtOAc, and filtered through Celite. The filtrate was washed with saturated Na2HCO3, H2O, and brine, dried over Na2SO4, and evaporated. The resulting residue was filtered through a short column of silica gel (hexane:EtOAc = 7:1) to give the adduct as a colorless oil, which was used without further purification. To a solution of the adduct in THF (32 mL) was added 1 M aqueous HCl solution (9.0 mL) at room temperature. After stirred at this temperature for 24 h, the reaction mixture was quenched with saturated NaHCO3 and extracted with EtOAc. The combined organic layer was washed with brine, dried over Na2SO4, and evaporated. The resulting residue was purified by silica gel column chromatography (hexane:EtOAc = 1:1) to give the corresponding diol (70) (250 mg, 2 steps 40%) as a colorless oil. H (400 MHz, CDCl3) 7.24 (2 H, d, *J* 8.6 Hz), 7.23 (2 H, d, *J* 8.6 Hz), 7.22 (2 H, d, *J* 8.6 Hz), 7.21 (2 H, d, *J* 8.6 Hz), 6.85 (2 H, d, *J* 8.6 Hz), 6.84 (2 H, d, *J* 8.6 Hz), 6.83 (2 H, d, *J* 6.8 Hz), 6.83 (2 H, d, *J* 8.6 Hz), 5.83 (1 H, s), 5.41 (1 H, d, *J* 9.5 Hz), 5.24 (1 H, d, *J* 9.8 Hz), 4.63 (1 H, d, *J* 10.8 Hz), 4.57 (1 H, d, *J* 10.8 Hz), 4.56-4.45 (4 H, m), 4.54 (2 H, s), 4.47 (1 H, d, *J* 11.7 Hz), 4.43 (1 H, d, *J* 11.5 Hz), 4.00 (1 H, d, *J* 12.1 Hz), 3.91 (1 H, d, *J* 12.1 Hz), 3.83-3.57 (5 H, m), 3.78 (3 H, s), 3.77 (3 H, s), 3.77 (3 H, s), 3.76 (3 H, s), 3.08 (1 H, dd, *J* 5.4, 5.1 Hz), 2.76 (1 H, m), 2.60 (1 H, m), 2.50 (1 H, br s), 2.22 (1 H, br s), 1.78 (3 H, s), 1.75 (3 H, s), 1.71 (3 H, s), 1.40-1.15 (19 H, m), 1.01 (3 H, d, *J* 6.8 Hz), 0.95 (3 H, d, *J* 6.6 Hz), 0.88 (3 H, t, *J* 6.8 Hz), 0.79 (3 H, d, *J* 6.6 Hz); C (100 MHz, CDCl3) 159.1, 159.1, 159.0, 158.8, 134.6, 134.1, 133.8, 132.7, 131.5, 131.3, 131.0, 130.5, 130.5, 130.2, 129.8, 129.4, 129.2, 128.9, 113.6, 113.6, 113.6, 113.4, 87.1, 83.2, 79.4, 78.6, 77.4, 75.6, 74.3, 73.6, 72.8, 72.3, 69.0, 61.5, 55.0, 55.0, 55.0, 55.0, 36.5, 36.0, 35.7, 34.1, 31.8, 29.9, 29.6, 29.6, 29.5, 29.3, 27.2, 20.9, 18.3, 17.3, 17.0, 14.7, 14.5, 14.2, 12.3; HRMS (ESI) calcd. for C65H98NO11S (M+NH4)+ 1068.7140, found 1068.7150.

# (2*S*,3*S*,4*R*)-2,3,5-Trihydroxy-4-[[(2*E*,4*R*,6*E*,8*E*,10*S*,11*R*,12*S*)-5-oxo-2,4,6,8,10,12-

# hexamethyl-11-hydroxy-2,6,8-docosatrienyl]oxy]pentanoic acid 26

# To a solution of the diol (70) (147 mg, 0.138 mmol) and pyridine (0.056 mL, 0.69 mmol) in dichloromethane (3.0 mL) was added Dess–Martin periodinane (234 mg, 0.552 mmol) at 0 ˚C. After stirred at room temperature for 2 h, the reaction mixture was diluted with EtOAc. The organic layer was washed with saturated NaHCO3, 10% NaHSO3, and brine, dried over Na2SO4 and evaporated. The resulting residue was purified by silica gel column chromatography (hexane:EtOAc = 4:1) to give the corresponding aldehyde (50.4 mg, 34%) as a colorless oil. H (300 MHz, CDCl3) 9.49 (2 H, d, *J* 4.2 Hz), 7.26-7.18 (6 H, m), 7.12-7.04 (2 H, m), 6.96 (1 H, m), 6.89-6.74 (8 H, m), 5.72 (1 H, d, *J* 9.9 Hz), 5.44 (1 H, d, *J* 9.3 Hz), 4.55-4.33 (10 H, m), 4.04-3.98 (2 H, m), 3.90 (1 H, d, *J* 11.0 Hz), 3.79 (3 H, s), 3.78 (3 H, s), 3.78 (3 H, s), 3.78 (3 H, s), 3.75-3.53 (3 H, m), 3.11 (1 H, t, *J* 5.3 Hz), 2.81 (1 H, m), 1.92 (3 H, s), 1.84 (3 H, s), 1.72 (3 H, s), 1.68 (3 H, s), 1.35-1.17 (19 H, m), 1.15 (3 H, d, *J* 6.6 Hz), 1.03 (3 H, d, *J* 6.8 Hz), 0.95 (3 H, t, *J* 6.8 Hz), 0.88 (3 H, d, *J* 6.6 Hz).

# To a solution of the aldehyde (60.0 mg, 0.0566 mmol) in *tert*-butyl alcohol (0.6 mL) and 2-methyl-2-butene (0.4 mL) was added a mixture of sodium chlorite (113 mg) and sodium dihydrogenphosphate (113 mg) in water (0.6 mL). After stirred for 12 h at room temperature, the reaction mixture was diluted with EtOAc and 0.5 M KHSO4. The organic layer was separated, and the aqueous layer was extracted with EtOAc. The combined organic layer was washed with 10% NaHSO3 and brine, dried over Na2SO4, and evaporated. The resulting residue was purified by silica gel column chromatography (chloroform:MeOH = 20:1) to give the corresponding acid (44.4 mg, 73%) as a colorless oil. H (400 MHz, CDCl3) 7.26 (6 H, m), 7.08 (2 H, d, *J* 8.6 Hz), 7.00 (1 H, s), 6.85 (2 H, d, *J* 8.6 Hz), 6.85 (2 H, d, *J* 8.6 Hz), 6.82 (2 H, d, *J* 8.6 Hz), 6.77 (2 H, d, *J* 8.6 Hz), 5.74 (1 H, d, *J* 9.8 Hz), 5.50 (1 H, d, *J* 9.3 Hz), 4.57 (1 H, d, *J* 11.2 Hz), 4.53 (1 H, d, *J* 10.8 Hz), 4.52-4.33 (8 H, m), 4.22 (1 H, d, *J* 3.9 Hz), 4.05 (1 H, dd, *J* 7.8, 3.9 Hz), 3.83-3.48 (3 H, m), 3.78 (3 H, s), 3.78 (3 H, s), 3.76 (3 H, s), 3.75 (3 H, s), 3.12 (1 H, dd, *J* 5.4, 5.1 Hz), 2.81 (1 H, m), 1.92 (3 H, s), 1.84 (3 H, s), 1.63 (3 H, s), 1.32-1.16 (19 H, m), 1.17 (3 H, d, *J* 6.8 Hz), 1.04 (3 H, d, *J* 6.8 Hz), 0.95 (3 H, t, *J* 6.6 Hz), 0.88 (3 H, d, *J* 6.8 Hz); *m/z* (ESI) 1080, [M+NH4]+.

# To a solution of the acid (20.4 mg, 0.019 mmol) in dichloromethane (1.5 mL) was added BCl3 (0.12 mL, 0.12 mmol, 1.0 M in heptane) at –78 ˚C. After stirred at this temperature for 5 min, the reaction mixture was quenched with saturated NaHCO3 and poured into aqueous citric acid and EtOAc was added. The organic layer was separated, and the aqueous layer was extracted with EtOAc. The combined organic layer was washed with brine, dried over Na2SO4, and evaporated. The resulting residue was purified by preparative thin layer chromatography on silica gel (chloroform:MeOH:H2O = 4:1:0.1) to give the derivative (26) (1.9 mg, 17%) as a colorless oil.H (400 MHz, CDCl3) 7.09 (1 H, s), 5.69 (1 H, d, *J* 10.0 Hz), 5.38 (1 H, d, *J* 9.5 Hz), 4.28-4.14 (2 H, m), 4.08-3.88 (3 H, m), 4.32-3.60 (3 H, m), 3.44-3.24 (1 H, m), 2.77-2.65 (1 H, m), 1.91 (3 H, s), 1.89 (3 H, s), 1.79 (1 H, s), 1.57-1.45 (1 H, m), 1.43-1.10 (18 H, m), 1.12 (3 H, d, *J* 6.6 Hz), 1.01 (3 H, d, *J* 6.6 Hz), 0.91 (3 H, d, *J* 6.8 Hz); HRMS (ESI) calcd. for C33H57O8 (M-H)- 581.4054, found 581.4076.

# Synthesis of derivative 27

# (4*R*,5*R*)-3-[(4-Methoxybenzyloxy)methyl]-4,5-bis(4-methoxybenzyloxy)-6-(*tert*-butyldimethylsiloxy)hexanal 71

# To a solution of oxalyl chloride (0.686 mL, 8.00 mmol) in dichloromethane (20 mL) was added DMSO (1.14 mL, 16.1 mmol) at –78 ˚C slowly. The mixture was stirred for 10 min, and then a solution of the alcohol (5) (2.50 g, 4.00 mmol) in dichloromethane (5.0 mL) was added. After the reaction mixture was stirred at this temperature for 1 h, triethylamine (4.46 mL, 32.2 mmol) was added. The mixture was warmed to 0 ˚C and further stirred for 1 h. The reaction was quenched with saturated NH4Cl and extracted with EtOAc. The combined organic layer was washed with brine, dried over Na2SO4, and evaporated. The resulting residue was filtered through silica gel column chromatography (hexane:EtOAc = 5:1) to give the corresponding ketone, which was used without further purification. To a solution of (carbethoxymethylene)triphenylphosphorane (8.36 g, 24.0 mmol) in THF (20 mL) was added a solution of the ketone in THF (20 mL) at room temperature and the mixture was stirred at reflux for 3 days. The cooled reaction mixture was filtered and washed with diethyl ether. The combined organic layer was washed with saturated NaHCO3 and brine, dried over Na2SO4, and evaporated. The resulting residue was filtered through silica gel column chromatography (hexane:EtOAc = 6:1) to give the corresponding ester, which was used without further purification. To a solution of ester in THF (17 mL) and ethanol (17 mL) was added nickel chloride (911 mg, 7.03 mmol) and sodium borohydride (1.33 g, 35.2 mmol) at 0 ˚C carefully. The reaction mixture was warmed to room temperature and stirred for 1 h. The mixture was cooled to 0 ˚C again and quenched with saturated NH4Cl and then extracted with EtOAc. The combined organic layer was washed with brine, dried over Na2SO4, and evaporated. The resulting residue was purified through silica gel column chromatography (hexane:EtOAc = 5:1) to give the ester (2.15 g, 3 steps 77%) as a colorless oil.H (400 MHz, CDCl3) 7.27-7.13 (6 H, m), 6.88-6.78 (6 H, m), 4.70-4.28 (6 H, m), 4.10-3.97 (2 H, m), 3.90-3.30 (15 H, m), 2.62-2.29 (3 H, m), 1.24-1.15 (3 H, m), 0.94-0.84 (9 H, m), 0.19-0.01 (6 H, m). C (100 MHz, CDCl3) major: 173.2, 159.0, 158.9, 131.0, 130.8, 130.5, 129.5, 129.3, 129.1, 113.5, 80.8, 77.6, 73.8, 72.6, 72.4, 70.1, 62.8, 37.5, 32.8, 18.1, 14.1, –5.5, –5.5. minor: 173.0, 159.0, 130.8, 130.5, 129.6, 129.5, 129.1, 113.5, 80.4, 78.3, 73.7, 72.5, 72.5, 69.2, 63.1, 37.3, 33.7.

# To a solution of the ester (6.00 g, 8.62 mmol) in dichloromethane (86 mL) at –78 ˚C was added diisobutylaluminum hydride (9.53 mL, 9.05 mmol, 0.95 M in hexane) dropwise. After stirred at this temperature for 30 min, the reaction mixture was quenched with MeOH and then added aqueous Rochelle salt and diethyl ether was added. The mixture was warmed to room temperature and stirred vigorously for 12 h. The organic layer was separated, and the aqueous layer was extracted with diethyl ether. The combined organic layer was washed with brine, dried over Na2SO4, and evaporated. The resulting residue was purified by silica gel column chromatography (hexane:EtOAc = 4:1) repeatedly to give the aldehyde (71a) (2.20 g, 36%) and (71b) (3.20 g, 57%) as a colorless oil.

# (71a): H (400 MHz, CDCl3) 9.64 (1 H, t, *J* 2.1 Hz), 7.26-7.14 (6 H, m), 6.89-6.80 (6 H, m), 4.63 (1 H, d, *J* 11.2 Hz), 4.54 (1 H, d, *J* 11.2 Hz), 4.47 (1 H, d, *J* 11.2 Hz), 4.42 (1 H, d, *J* 11.2 Hz), 4.33 (1 H, d, *J* 10.7 Hz), 4.31 (1 H, d, *J* 10.7 Hz), 3.79 (3 H, s), 3.79 (3 H, s), 3.78 (3 H, s), 3.76-3.68 (2 H, m), 3.61 (1 H, m), 3.57 (1 H, m), 3.50 (1 H, dd, *J* 9.3, 4.9 Hz), 3.40 (1 H, dd, *J* 9.3, 7.0 Hz), 2.61 (1 H, m), 2.48-2.36 (2 H, m), 0.90 (9 H, s), 0.05 (3 H, s), 0.05 (3 H, s); C (100 MHz, CDCl3) 202.2, 159.2, 159.1, 159.1, 130.6, 130.2, 129.7, 129.7, 129.6, 129.2, 113.7, 113.6, 113.6, 79.8, 78.1, 73.6, 72.7, 72.3, 69.6, 62.8, 55.2, 55.2, 55.2, 43.6, 35.7, 25.9, 18.2, –5.4.

# (71b): H (300 MHz, CDCl3) 9.64 (1 H, t, *J* 2.0 Hz), 7.26-7.13 (6 H, m), 6.90-6.80 (6 H, m), 4.62 (1 H, d, *J* 11.5 Hz), 4.55 (1 H, d, *J* 11.0 Hz), 4.48 (1 H, d, *J* 11.0 Hz), 4.37 (1 H, d, *J* 11.5 Hz), 4.32 (1 H, d, *J* 11.9 Hz), 4.28 (1 H, d, *J* 11.9 Hz), 3.79 (3 H, s), 3.79 (3 H, s), 3.78 (3 H, s), 3.76-3.69 (2 H, m), 3.65 (1 H, m), 3.52 (1 H, m), 3.36 (1 H, dd, *J* 9.2, 5.3 Hz), 3.24 (1 H, dd, *J* 9.2, 6.4 Hz), 2.68-2.51 (2 H, m), 2.48-2.36 (1 H, m), 0.90 (9 H, s), 0.05 (6 H, s); C (75 MHz, CDCl3) 202.2, 159.2, 159.1, 159.1, 130.5, 130.5, 130.2, 129.7, 129.6, 129.2, 113.7, 113.6, 113.6, 80.2, 78.0, 73.8, 72.6, 72.5, 70.4, 62.5, 55.2, 55.2, 55.2, 43.3, 36.4, 25.9, 18.2, –5.4, –5.4.

# (2*R*,3*R*,4*E*,6*E*,8*S*,9*R*,10*S*)-2,4,6,8,10-Pentamethyl-3-(triphenylsiloxy)-9-(4-

# methoxybenzyloxy)- 4,6-icosadiene-1-ol 73

# To a solution of the alkyne (3) (900 mg, 2.33 mmol) in THF (9.3 mL) was added 9-BBN (9.32 mL, 4.66 mmol, 0.5 M in THF) at 0 ˚C. After stirring at room temperature for 12 h, a solution of the iodide (72) (1.17 g, 1.94 mmol) in DMF (9.3 mL), H2O (9.3 mL), K3PO4 (2.06 g, 9.70 mmol), and PdCl2(dppf) (320 mg, 0.392 mmol) was added and stirred at 65 ˚C for 20 min. The reaction mixture was cooled to room temperature, diluted with EtOAc, and filtered through Celite. The filtrate was washed with saturated NaHCO3, H2O, and brine, dried over Na2SO4, and evaporated. The resulting residue was filtered by silica gel column chromatography (hexane:EtOAc = 20:1) to give the adduct, which was used without further purification. To a solution of the adduct in dichloromethane (20 mL) at –78 ˚C was added diisodutylaluminum hydride (5.22 mL, 4.85 mmol, 0.95 M in hexane) dropwise. After stirred at this temperature for 20 min, the reaction mixture was quenched with MeOH and then added aqueous Rochelle salt and EtOAc was added. The mixture was warmed to room temperature and stirred vigorously for 5 h. The organic layer was separated, and the aqueous layer was extracted with EtOAc. The combined organic layer was washed with brine, dried over Na2SO4, and evaporated. The resulting residue was purified by silica gel column chromatography (hexane:EtOAc = 9:1) to give the alcohol (73) (1.18 g, 2 steps, 78%) as a colorless oil. H (400 MHz, CDCl3) 7.61 (6 H, dd, *J* 7.6, 1.0 Hz), 7.43-7.29 (9 H, m), 7.22 (2 H, d, *J* 8.6 Hz), 6.84 (2 H, d, *J* 8.6 Hz), 5.54 (1 H, s), 5.16 (1 H, d, *J* 9.8 Hz), 4.47 (1 H, d, *J* 10.5 Hz), 4.43 (1 H, d, *J* 10.5 Hz), 4.03 (1 H, d, *J* 8.6 Hz), 3.76 (3 H, s), 3.68 (1 H, dd, *J* 11.0, 5.4 Hz), 3.62 (1 H, dd, *J* 11.0, 4.1 Hz), 3.04 (1 H, t, *J* 5.1 Hz), 2.71 (1 H, m), 2.12 (1 H, br s), 1.98 (1 H, m), 1.64 (3 H, s), 1.54 (3 H, s), 1.45-1.12 (19 H, m), 0.98 (3 H, d, *J* 6.8 Hz), 0.94 (3 H, d, *J* 6.6 Hz), 0.88 (3 H, t, *J* 6.6 Hz), 0.73 (3 H, d, *J* 6.8 Hz); C (100 MHz, CDCl3) 158.9, 135.6, 134.1, 133.9, 133.9, 132.9, 131.6, 131.1, 129.9, 128.9, 127.7, 113.5, 87.2, 84.6, 74.4, 66.2, 55.1, 39.2, 36.1, 35.7, 34.2, 31.8, 30.0, 29.6, 29.6, 29.6, 29.3, 27.3, 22.6, 18.4, 16.8, 14.8, 14.1, 13.9, 13.0.

# (4*R*,5*R*,6*E*,8*E*,10*S*,11*R*,12*S*)-4,6,8,10,12-Pentamethyl-5-(triphenylsiloxy)-11-(4-

# methoxybenzyloxy)- 6,8-docosadiene-2-yn 74

# To a solution of oxalyl chloride (0.250 mL, 2.91 mmol) in dichloromethane (7.0 mL) was added DMSO (0.460 mL, 6.48 mmol) at –78 ˚C slowly. The reaction mixture was stirred for 10 min, and then a solution of the alcohol (73) (1.01 g, 1.30 mmol) in dichloromethane (3.0 mL) was added. After the reaction mixture was stirred at this temperature for 1 h, triethylamine (2.70 mL, 19.5 mmol) was added. The mixture was warmed to 0 ˚C and further stirred for 1 h. The reaction was quenched with saturated NH4Cl and extracted with EtOAc. The combined organic layer was washed with brine and dried over Na2SO4 and evaporated to give the crude aldehyde, which was used without further purification. To a solution of tetrabromomethane (862 mg, 2.60 mmol) in dichloromethane (7.0 mL) was added triphenylphosphine (1.36 g, 5.19 mmol) at 0 ˚C. To the reaction mixture was added a solution of the crude aldehyde in dichloromethane (3.0 mL) and stirred at this temperature for 5 min. The reaction mixture was directly purified by silica gel column chromatography (hexane:EtOAc = 3:1) to give the corresponding dibromide (1.11 g, 2 steps 92%) as a colorless oil. []D26.0 –8.14 (*c* 0.926 in CHCl3); max(film)/cm–1 2925, 2851, 1612, 1514, 1062; H (400 MHz, CDCl3) 7.61 (6 H, dd, *J* 7.8, 1.5 Hz), 7.43-7.30 (9 H, m), 7.22 (2 H, d, *J* 8.6 Hz), 6.84 (2 H, d, *J* 8.6 Hz), 6.12 (1 H, d, *J* 9.5 Hz), 5.55 (1 H, s), 5.18 (1 H, d, *J* 9.5 Hz), 4.46 (1 H, d, *J* 10.8 Hz), 4.42 (1 H, d, *J* 10.8 Hz), 3.92 (1 H, d, *J* 7.6 Hz), 3.78 (3 H, s), 3.04 (1 H, dd, *J* 5.4, 5.1 Hz), 2.87-2.65 (2 H, m), 1.69 (3 H, s), 1.67-1.57 (1 H, m), 1.56 (3 H, s), 1.45-1.12 (18 H, m), 0.98 (3 H, d, *J* 6.6 Hz), 0.94 (3 H, d, *J* 6.8 Hz), 0.88 (3 H, t, *J* 6.7 Hz), 0.80 (3 H, d, *J* 6.8 Hz); C (100 MHz, CDCl3) 158.9, 142.2, 135.7, 134.4, 133.7, 133.6, 133.0, 131.7, 131.1, 129.8, 128.9, 127.7, 113.6, 88.6, 87.2, 83.2, 74.4, 55.2, 43.4, 36.1, 35.7, 34.2, 31.9, 30.0, 29.7, 29.7, 29.7, 29.4, 27.4, 22.7, 18.4, 16.9, 15.9, 14.8, 14.1, 13.4.

# To a solution of the dibromide (1.11 g, 1.19 mmol) in THF (20 mL) was added *n*-butyllithium (1.69 mL, 2.62 mmol, 1.55 M in hexane) at –78 ˚C. After stirring at this temperature for 30 min, methyl iodide (0.740 mL, 11.9 mmol) was added and the mixture was warmed to room temperature. After further stirred for 30 min, the reaction mixture was quenched with saturated NH4Cl and extracted with EtOAc. The combined organic layer was washed with brine, dried over Na2SO4, and evaporated. The resulting residue was purified by silica gel column chromatography (hexane:EtOAc = 50:1) to give the corresponding alkyne (74) (850 mg, 91%) as a colorless oil. []D26.8 –25.4 (*c* 0.970 in CHCl3); max(film)/cm–1 2925, 1613, 1514, 1428, 1249, 1117, 712, 706; H (400 MHz, CDCl3) 7.66 (6 H, dd, *J* 8.0, 1.5 Hz), 7.44-7.29 (9 H, m), 7.21 (2 H, d, *J* 8.6 Hz), 6.83 (2 H, d, *J* 8.6 Hz), 5.50 (1 H, s), 5.17 (1 H, d, *J* 9.3 Hz), 4.46 (1 H, d, *J* 10.5 Hz), 4.42 (1 H, d, *J* 10.5 Hz), 3.99 (1 H, d, *J* 8.5 Hz), 3.77 (3 H, s), 3.04 (1 H, dd, *J* 5.4, 5.1 Hz), 2.79-2.64 (2 H, m), 1.65 (3 H, s), 1.63 (3 H, d, *J* 2.2 Hz), 1.55 (3 H, s), 1.44-1.13 (19 H, m), 0.97 (3 H, d, *J* 6.8 Hz), 0.93 (3 H, d, *J* 6.8 Hz), 0.93 (3 H, d, *J* 6.8 Hz), 0.88 (3 H, t, *J* 6.8 Hz); C (100 MHz, CDCl3) 158.9, 135.8, 134.9, 133.7, 133.7, 133.2, 131.7, 131.2, 129.6, 128.9, 127.5, 113.6, 89.9, 87.2, 84.2, 82.8, 74.4, 55.2, 36.1, 35.7, 34.3, 31.9, 31.7, 30.0, 29.7, 29.7, 29.7, 29.3, 27.4, 22.7, 18.4, 17.6, 16.9, 14.8, 14.1, 12.9, 3.5; HRMS (ESI) calcd. for C53H74NO3Si (M+NH4)+ 800.5438, found 800.5419.

# (2*E*,4*R*,5*R*,6*E*,8*E*,10*S*,11*R*,12*S*)-2-Iodo-4,6,8,10,12-pentamethyl-5-(triphenylsiloxy)-11-(4-methoxybenzyloxy)-2,6,8-docosatriene 75

# To a solution of the alkyne (74) (4.50 g, 5.75 mmol) in THF (115 mL) was added zirconocene hydrochloride (Schwartz reagent) (4.47 g, 17.3 mmol). After stirred at 50 ˚C for 1h, the reaction mixture was cooled to 0 ˚C and added a solution of iodide (1.75 g, 6.89 mmol) in THF (30 mL). After stirred at 0 ˚C for 5 min, the reaction mixture was quenched with saturated NaHCO3 and 10% NaHSO3 and extracted with diethyl ether. The combined organic layer was washed with brine, dried over Na2SO4, and evaporated. The resulting residue was purified by silica gel column chromatography (hexane:EtOAc = 50:1) to give the corresponding iodide (75) (4.29 g, 82%) as a colorless oil. H (300 MHz, CDCl3) 7.61 (6 H, dd, *J* 7.7, 2.0 Hz), 7.44-7.28 (9 H, m), 7.22 (2 H, d, *J* 8.6 Hz), 6.84 (2 H, d, *J* 8.6 Hz), 5.90 (1 H, dq, *J* 9.9, 1.5 Hz), 5.50 (1 H, s), 5.15 (1 H, d, *J* 9.7 Hz), 4.46 (1 H, d, *J* 10.6 Hz), 4.42 (1 H, d, *J* 10.6 Hz), 3.81 (1 H, m), 3.78 (3 H, s), 3.03 (1 H, dd, *J* 5.3, 5.1 Hz), 2.78-2.62 (2 H, m), 2.38 (3 H, d, *J* 1.5 Hz), 1.67 (3 H, s), 1.55 (3 H, s), 1.43-1.11 (19 H, m), 0.97 (3 H, d, *J* 6.8 Hz), 0.94 (3 H, d, *J* 6.6 Hz), 0.88 (3 H, t, *J* 6.7 Hz), 0.74 (3 H, d, *J* 6.8 Hz); C (75 MHz, CDCl3) 158.3, 145.0, 135.7, 134.5, 133.8, 133.6, 133.0, 131.7, 131.1, 129.7, 128.9, 127.7, 113.5, 94.5, 87.2, 84.0, 74.4, 55.2, 40.3, 36.1, 35.7, 34.2, 31.9, 30.0, 29.7, 29.7, 29.7, 29.4, 27.3, 22.7, 18.4, 16.9, 16.8, 14.8, 14.1, 14.1, 13.1; HRMS (ESI) calcd. for C53H75NO3SiI (M+NH4)+ 928.4561, found 928.4557.

# (2*R*,3*R*,7*E*,9*R*,10*R*,11*E*,13*E*,15*S*,16*R*,17*S*)-1-(*tert*-Butyldimethylsiloxy)-2,3,

# 16-tris(4-methoxybenzyloxy)-4-[(4-methoxybenzyloxy)methyl]-7,9,11,13,15,17-

# hexamethyl-10-(triphenylsiloxy)-7,11,13-heptacosatriene-6-ol 76

# To a mixture solution of the iodide (75) (1.00 g, 1.10 mmol) and the aldehyde (71b) (720 mg, 1.11 mmol) in DMSO (20 mL) was added NiCl2 (20.3 mg) and CrCl2 (2.03 g) portionwise. After stirred at room temperature for 6 h, the reaction mixture was quenched with saturated NH4Cl and extracted with EtOAc. The combined organic layer was washed with brine, dried over Na2SO4, and evaporated. The resulting residue was filtered by silica gel column chromatography (hexane:EtOAc = 5:1) to give the corresponding alcohol, which was used without further purification.

# To a solution of the alcohol in THF (12 mL) was added 1 M aqueous HCl solution (5.0 mL) at room temperature. After stirred at this temperature for 24 h, the reaction mixture was quenched with saturated NaHCO3 carefully and extracted with EtOAc. The combined organic layer was washed with brine, dried over Na2SO4, and evaporated. The resulting residue was purified by silica gel column chromatography (hexane:EtOAc = 1:2 to 1:4) to give the triol (76bc) (180 mg, 2 steps 15%) and the alcohol (76cd) (122 mg, 2 steps 10%) as diastereomers at C6. Stereochemistry at C6 was not determined.

# (76bc): []D20.7 –16.8 (*c* 0.610 in CHCl3); max(film)/cm–1 3416, 2925, 2857, 1614, 1515, 1248, 1084, 819;H (400 MHz, CDCl3) 7.29-7.18 (6 H, m), 7.18 (2 H, d, *J* 7.8 Hz), 6.92-6.79 (8 H, m), 5.80 (1 H, s), 5.40 (1 H, d, *J* 9.5 Hz), 5.22 (1 H, d, *J* 9.8 Hz), 4.64 (1 H, d, *J* 11.2 Hz), 4.62-4.52 (2 H, m), 4.53 (1 H, d, *J* 10.7 Hz), 4.45 (1 H, d, *J* 11.2 Hz), 4.45 (1 H, d, *J* 10.7 Hz), 4.37 (1 H, d, *J* 11.2 Hz), 4.34 (1 H, d, *J* 11.2 Hz), 4.03 (1 H, m), 3.77 (3 H, s), 3.77 (3 H, s), 3.77 (3 H, s), 3.76 (3 H, s), 3.76-3.35 (7 H, m), 3.08 (1 H, dd, *J* 5.1, 4.9 Hz), 2.75 (1 H, m), 2.68-2.43 (2 H, m), 2.33-2.15 (1 H, m), 2.12-2.00 (1 H, m), 1.76 (3 H, s), 1.75 (3 H, s), 1.62 (3 H, s), 1.52-1.15 (21 H, m), 1.00 (3 H, d, *J* 6.8 Hz), 0.95 (3 H, d, *J* 6.8 Hz), 0.88 (3 H, t, *J* 6.3 Hz), 0.78 (3 H, d, *J* 6.6 Hz); C (100 MHz, CDCl3) 159.2, 159.2, 159.1, 158.7, 139.4, 134.1, 133.9, 132.7, 131.5, 131.4, 130.2, 130.2, 129.8, 129.6, 129.5, 129.5, 128.9, 128.8, 113.7, 113.7, 113.6, 113.4, 87.2, 83.3, 80.1, 79.4, 75.5, 74.3, 73.6, 72.7, 72.4, 71.3, 61.7, 55.1, 55.1, 55.1, 55.1, 37.7, 36.3, 36.0, 35.7, 34.1, 31.8, 29.9, 29.6, 29.6, 29.6, 29.3, 27.2, 22.6, 18.3, 17.3, 17.1, 14.7, 14.0, 12.4, 12.3; HRMS (ESI) calcd. for C66H100NO11 [M+NH4]+ 1082.7296, found 1082.7280.

# (76bd): []D20.6 –16.1 (*c* 0.520 in CHCl3); max(film)/cm–1 3400, 2925, 2857, 1613, 1514, 1248, 1040, 821;H (400 MHz, CDCl3) 7.25 (2 H, d, *J* 8.6 Hz), 7.24 (2 H, d, *J* 8.6 Hz), 7.23 (2 H, d, *J* 8.6 Hz), 7.17 (2 H, d, *J* 8.6 Hz), 6.90-6.80 (6 H, m), 6.82 (2 H, d, *J* 8.6 Hz), 5.81 (1 H, s), 5.39 (1 H, d, *J* 9.5 Hz), 5.14 (1 H, d, *J* 9.5 Hz), 4.67 (1 H, d, *J* 11.0 Hz), 4.60 (1 H, d, *J* 11.7 Hz), 4.57 (1 H, d, *J* 11.7 Hz), 4.51 (1 H, d, *J* 10.5 Hz), 4.45 (2 H, d, *J* 10.5 Hz), 4.42 (1 H, *J* 11.0 Hz), 4.40 (1 H, d, *J* 11.5 Hz), 4.31 (1 H, d, *J* 11.5 Hz), 4.03 (1 H, m), 3.90-3.40 (6 H, m), 3.77 (3 H, s), 3.77 (3 H, s), 3.77 (3 H, s), 3.76 (3 H, s), 3.08 (1 H, t, *J* 5.1 Hz), 2.74 (1 H, m), 2.53 (1 H, m), 2.16 (1 H, m), 1.75 (3 H, s), 1.74 (3 H, s), 1.60 (3 H, s), 1.43-1.13 (21 H, m), 0.99 (3 H, d, *J* 6.6 Hz), 0.94 (3 H, d, *J* 6.6 Hz), 0.88 (3 H, t, *J* 6.6 Hz), 0.73 (3 H, d, *J* 6.6 Hz); C (100 MHz, CDCl3) 159.1, 159.1, 159.0, 158.8, 139.5, 134.4, 134.3, 132.9, 131.5, 131.3, 130.9, 130.9, 130.6, 130.2, 129.5, 129.5, 129.4, 129.0, 113.7, 113.7, 113.6, 113.5, 87.2, 83.8, 81.3, 79.4, 75.5, 74.4, 73.8, 72.5, 72.4, 70.8, 61.9, 55.1, 55.1, 55.1, 55.1, 36.3, 36.1, 35.7, 34.1, 32.6, 31.8, 29.9, 29.6, 29.6, 29.6, 29.3, 27.2, 22.6, 18.3, 17.2, 17.0, 14.7, 14.1, 12.1, 11.8; HRMS (ESI) calcd. for C66H100NO11 [M+NH4]+ 1082.7296, found 1082.7257.

# The isomer (76ac) and (76ad) were prepared in a similar manner as above; triol (76ac) (128 mg, 13%) and triol (76ad) (256 mg, 20%) as a colorless oil.

# (76ac): []D20.0 –23.1 (*c* 1.61 in CHCl3); max(film)/cm–1 3416, 2925, 2870, 1613, 1514, 1459, 1248, 1039, 821;H (300 MHz, CDCl3) 7.28-7.16 (8 H, m), 6.90-6.82 (8 H, m), 5.82 (1 H, s), 5.40 (1 H, d, *J* 9.3 Hz), 5.23 (1 H, d, *J* 9.6 Hz), 4.74 (1 H, d, *J* 11.2 Hz), 4.63-4.33 (8 H, m), 4.04 (1 H, t, *J* 6.2 Hz), 3.79 (3 H, s), 3.78 (3 H, s), 3.78 (3 H, s), 3.78 (3 H, s), 3.75-3.45 (5 H, m), 3.39 (1 H, dd, *J* 9.3, 5.5 Hz), 3.08 (1 H, t, *J* 5.1 Hz), 2.75 (1 H, m), 2.66-2.40 (2 H, m), 1.77 (3 H, s), 1.75 (3 H, s), 1.61 (3 H, s), 1.35-1.15 (21 H, m), 1.00 (3 H, d, *J* 6.8 Hz), 0.94 (3 H, d, *J* 6.8 Hz), 0.88 (3 H, t, *J* 6.6 Hz), 0.79 (3 H, d, *J* 6.6 Hz); C (75 MHz, CDCl3) 159.2, 159.1, 159.1, 158.8, 139.2, 134.2, 133.9, 132.8, 131.6, 131.4, 130.9, 130.4, 130.1, 129.6, 129.5, 129.2, 129.1, 129.0, 113.8, 113.7, 113.6, 113.5, 87.2, 84.0, 83.4, 81.2, 80.1, 75.3, 74.4, 74.3, 72.7, 72.2, 70.1, 61.4, 55.2, 55.2, 55.2, 55.2, 37.1, 36.4, 36.1, 35.7, 35.1, 34.1, 31.9, 29.9, 29.6, 29.6, 29.6, 29.3, 27.3, 22.6, 18.4, 17.5, 17.1, 14.8, 14.1, 12.3, 12.0; HRMS (ESI) calcd. for C66H100NO11 [M+NH4]+ 1082.7296, found 1082.7283.

# (76ad): []D20.4 –20.6 (*c* 1.02 in CHCl3); max(film)/cm–1 3405, 2925, 2862, 1613, 1515, 1459, 1248, 1086, 822, 756;H (300 MHz, CDCl3) 7.26-7.18 (6 H, m), 7.19 (2 H, d, *J* 8.6 Hz), 6.89-6.80 (8 H, m), 5.82 (1 H, s), 5.39 (1 H, d, *J* 9.5 Hz), 5.14 (1 H, d, *J* 9.3 Hz), 4.74 (1 H, d, *J* 11.0 Hz), 4.62-4.33 (8 H, m), 4.04 (1 H, t, *J* 6.0 Hz), 3.78 (3 H, s), 3.78 (3 H, s), 3.77 (3 H, s), 3.72 (3 H, s), 3.74-3.50 (5 H, m), 3.37 (1 H, dd, *J* 9.0, 6.2 Hz), 3.07 (1 H, t, *J* 5.0 Hz), 2.75 (1 H, m), 2.56 (1 H, m), 2.10 (1 H, m), 1.75 (3 H, s), 1.74 (3 H, s), 1.62 (3 H, s), 1.40-1.15 (21 H, m), 0.98 (3 H, d, *J* 6.8 Hz), 0.94 (3 H, d, *J* 6.6 Hz), 0.88 (3 H, t, *J* 6.8 Hz), 0.74 (3 H, d, *J* 6.8 Hz); C (75 MHz, CDCl3) 159.1, 159.1, 159.0, 158.8, 139.5, 134.4, 134.3, 132.9, 131.5, 131.4, 131.0, 130.5, 130.2, 129.5, 129.4, 129.3, 129.3, 129.0, 113.7, 113.7, 113.6, 113.5, 87.2, 83.7, 81.3, 80.3, 75.7, 74.4, 74.4, 72.6, 72.3, 70.2, 61.6, 55.2, 55.2, 55.2, 55.2, 37.2, 36.1, 35.8, 34.9, 34.2, 31.9, 30.0, 29.6, 29.6, 29.6, 29.3, 27.3, 22.6, 18.4, 17.3, 17.1, 14.7, 14.1, 12.3, 11.8; HRMS (ESI) calcd. for C66H100NO11 (M+NH4)+ 1082.7296, found 1082.7290.

# (2*S*,3*R*,7*E*,9*R*,11*E*,13*E*,15*S*,16*R*,17*S*)-2,3,16-Trihydroxy-4-(hydroxylmethyl)-6,10-dioxo-7,9,11,13,15,17-hexamethyl-7,11,13-heptacosatrienoic acid 27

# To a solution of oxalyl chloride (0.036 mL, 0.42 mmol) in dichloromethane (2.5 mL) was added DMSO (0.060 mL, 0.85 mmol) at –78 ˚C. The mixture was stirred for 10 min, and then a solution of the triol (76bd) (75.5 mg, 0.0709 mmol) in dichloromethane (1.0 mL) was added. After the reaction mixture was stirred at this temperature for 1 h, triethylamine (0.234 mL, 1.69 mmol) was added. The mixture was warmed to 0 ˚C and further stirred for 1 h. The reaction was quenched with saturated NH4Cl and extracted with EtOAc. The combined organic layer was washed with brine and dried over Na2SO4 and evaporated. The residue was filtered through a short column of silica gel (hexane:EtOAc = 3:1) to give the crude aldehyde as a colorless oil, which was used without further purification. To a solution of the crude aldehyde in *tert*-butyl alcohol (1.0 mL) and 2-methyl-2-butene (0.6 mL) was added a mixture of sodium chlorite (100 mg) and sodium dihydrogenphosphate (100 mg) in water (1.0 mL). After stirred for 12 h at room temperature, the reaction mixture was diluted with EtOAc and 0.5 M KHSO4. The organic layer was separated, and the aqueous layer was extracted with EtOAc. The combined organic layer was washed with 10% NaHSO3 and brine, dried over Na2SO4, and evaporated. The resulting residue was purified by silica gel column chromatography (chloroform:MeOH = 50:1 to 20:1) to give the corresponding acid (32.8 mg, 2 steps 47%) as a colorless oil. []D20.6 +13.8 (*c* 1.37 in CHCl3); max(film)/cm–1 3477, 2926, 2857, 1720, 1664, 1614, 1514, 1248, 1038, 822, 760;H (400 MHz, CDCl3) 7.21 (2 H, d, *J* 8.8 Hz), 7.20-7.05 (6 H, m), 6.94 (1 H, s), 6.88-6.70 (6 H, m), 6.84 (2 H, d, *J* 8.8 Hz), 6.64 (1 H, d, *J* 9.3 Hz), 5.75 (1 H, d, *J* 9.8 Hz), 4.60 (1 H, d, *J* 11.0 Hz), 4.59 (1 H, d, *J* 11.0 Hz), 4.48 (1 H, d, *J* 11.0 Hz), 4.46 (1 H, d, *J* 11.0 Hz), 4.36 (1 H, d, *J* 11.0 Hz), 4.24 (1 H, d, *J* 11.0 Hz), 4.24-4.16 (3 H, m), 4.05-3.95 (2 H, m), 3.77 (3 H, s), 3.75 (3 H, s), 3.74 (3 H, s), 3.71 (3 H, s), 3.34 (1 H, dd, *J* 9.0, 4.4 Hz), 3.12 (1 H, dd, *J* 5.4, 5.1 Hz), 3.09 (1 H, dd, *J* 9.0, 4.7 Hz), 2.88-2.75 (1 H, m), 2.73-2.57 (1 H, m), 1.93 (3 H, s), 1.84 (3 H, s), 1.74 (3 H, s), 1.41-1.10 (19 H, m), 1.18 (3 H, d, *J* 6.8 Hz), 1.04 (3 H, d, *J* 6.8 Hz), 0.95 (3 H, d, *J* 6.8 Hz), 0.88 (3 H, t, *J* 6.7 Hz); C (100 MHz, CDCl3) 203.0, 201.3, 174.7, 159.4, 159.2, 159.0, 159.0, 144.1, 142.2, 141.1, 136.6, 133.4, 131.4, 131.2, 130.3, 130.1, 130.1, 129.9, 129.3, 129.0, 128.9, 113.8, 113.7, 113.6, 113.6, 87.1, 79.5, 79.4, 74.6, 74.1, 72.4, 69.9, 60.4, 55.3, 55.2, 55.2, 55.1, 40.2, 37.0, 36.4, 36.2, 35.4, 34.0, 31.9, 30.0, 30.0, 29.6, 29.6, 29.3, 27.2, 22.7, 18.3, 18.2, 16.7, 14.9, 14.2, 14.1, 14.1, 13.4; HRMS (ESI) calcd. for C66H94NO12 (M+NH4)+ 1092.6776, found 1092.6761.

# The isomer was prepared in a similar manner as above; acid (53.4 mg, 2 steps 41% from 76ad) as a colorless oil.

# []D19.1 +4.51 (*c* 0.625 in CHCl3); H (400 MHz, CDCl3) 7.26-7.08 (8 H, m), 6.95 (1 H, s), 6.87-6.70 (8 H, m), 6.65 (1 H, d, *J* 9.0 Hz), 5.77 (1 H, d, *J* 9.5 Hz), 4.63-4.07 (9 H, m), 3.92 (1 H, m), 3.80-3.70 (1 H, m), 3.78 (3 H, s), 3.77 (3 H, s), 3.73 (3 H, s), 3.68 (3 H, s), 3.38 (2 H, d, *J* 3.7 Hz), 3.13 (1 H, dd, *J* 5.1, 4.9 Hz), 2.87-2.73 (3 H, m), 2.70-2.55 (1 H, m), 1.94 (3 H, s), 1.85 (3 H, s), 1.74 (3 H, s), 1.40-1.12 (19 H, m), 1.18 (3 H, d, *J* 6.8 Hz), 1.04 (3 H, d, *J* 6.6 Hz), 0.95 (3 H, d, *J* 6.6 Hz), 0.88 (3 H, t, *J* 6.8 Hz); C (100 MHz, CDCl3) 202.7, 201.0, 174.8, 159.4, 159.1, 159.1, 159.0, 143.9, 142.2, 140.9, 136.6, 133.4, 131.4, 131.2, 130.2, 130.1, 130.0, 129.8, 129.3, 129.0, 128.9, 113.8, 113.7, 113.6, 113.6, 87.1, 79.6, 79.2, 74.6, 73.5, 72.4, 68.9, 60.4, 55.2, 55.2, 55.1, 55.0, 40.0, 36.4, 36.2, 36.2, 34.8, 34.0, 31.9, 29.9, 29.6, 29.6, 29.6, 29.3, 27.2, 22.6, 18.4, 18.3, 16.7, 14.9, 14.1, 13.3, 11.5; HRMS (ESI) calcd. for C66H94NO12 [M+NH4]+ 1092.6776, found 1092.6788.

# To a solution of the acid (42.5 mg, 0.0395 mmol) in dichloromethane (3.0 mL) was added BCl3 (0.20 mL, 0.20 mmol, 1.0 M in heptane) at –78 ˚C. After stirred at this temperature for 5 min, the reaction mixture was quenched with saturated NaHCO3 and poured into aqueous citric acid and EtOAc. The organic layer was separated, and the aqueous layer was extracted with EtOAc. The combined organic layer was washed with brine, dried over Na2SO4, and evaporated. The resulting residue was purified by preparative thin layer chromatography on silica gel column (chloroform:MeOH:H2O = 4:1:0.1) to give the derivative (27b) (2.0 mg, 9%) as a colorless oil.H (400 MHz, CD3OD) 7.03 (1 H, d, *J* 9.3 Hz), 7.01 (1 H, s), 5.68 (1 H, m), 4.16 (1 H, m), 3.88 (1 H, m), 3.75-3.48 (3 H, m), 3.25 (1 H, m), 2.80-2.65 (3 H, m), 1.89 (3 H, s), 1.88 (3 H, s), 1.70 (3 H, s), 1.56-1.20 (20 H, m), 1.08 (3 H, m), 1.00 (3 H, m), 0.93-0.82 (6 H, m); HRMS (ESI) calcd. for C34H57O8 (M-H)- 593.4054, found 593.4056.

# The derivative (27a) was prepared in a similar manner as above; (6.0 mg, 21%) as a colorless oil.H (400 MHz, CD3OD) 7.09 (1 H, d, *J* 8.5 Hz), 7.07 (1 H, s), 5.68 (1 H, d, *J* 8.3 Hz), 4.20 (1 H, m), 4.19-3.75 (2 H, m), 3.66 (1 H, m), 3.23 (1 H, m), 2.90-2.70 (3 H, m), 1.92 (3 H, s), 1.89 (3 H, s), 1.73 (3 H, s), 1.57-1.45 (1 H, m), 1.45-1.19 (19 H, m), 1.13 (3 H, d, *J* 6.6 Hz), 1.01 (3 H, d, *J* 6.8 Hz), 0.92 (3 H, d, *J* 6.6 Hz), 0.89 (3 H, t, *J* 7.1 Hz); HRMS (ESI) calcd. for C34H57O8 (M-H)- 593.4054, found 593.4051.

# Synthesis of derivative 28 and 29

# *S*-Ethyl (2*R*,3*R*)-2-methyl-3-hydroxydodecathioate 81

# To a suspension of (*S*)-3,3’6,6’-tetraiodobinaphthol (2.43 g, 3.08 mmol) in toluene (76 mL) was added a solution of zirconium tetra-*tert*- butoxide (933 mg, 2.56 mmol) in toluene (76 mL) at room temperature. After stirring at this temperature for 3 h, a mixture of propanol (1.23 g, 20.5 mmol) and water (92 mg, 5.1 mmol) in toluene (76 mL) was added. After stirred at room temperature for 1 h, the reaction mixture was cooled to 0 ˚C and then a solution of decanal (78) (4.00 g, 25.6 mmol) in toluene (76 mL) followed by a solution of silyl enol ether (79) (7.30 g, 38.3 mmol) in toluene (76 mL) at 0 ˚C. After stirred at this temperature for 48 h, the reaction mixture was quenched with saturated NaHCO3, and filtered through Celite. The organic layer was separated and aqueous layer was extracted with EtOAc. The combined organic layer was washed with brine, dried over Na2SO4, and evaporated. The resulting residue was treated with THF:1 N HCl (20:1) for 1 h at 0 ˚C and then the mixture was poured into saturated NaHCO3 and extracted with EtOAc. The combined organic layer was washed with brine, dried over Na2SO4, and evaporated. The resulting residue was purified by silica gel column chromatography (hexane:benzene = 1:3 to benzene:EtOAc = 50:1) to give the corresponding adduct (81) [6.23 g, 75%, *syn*/*anti* = 14:86, 91% ee (*anti*)] as a colorless oil. This adduct was dissolved with hexane and cooled to –20 ˚C. After crystallization, hexane was removed to give the adduct [2.27 g, *syn*/*anti* = 4:96, 99% ee (*anti*)] as a colorless oil at room temperature, which was used in the next step. H (300 MHz, CDCl3) 3.69 (1 H, m), 2.90 (2 H, q, *J* 7.4 Hz), 2.72 (1 H, dq, *J* 5.8, 7.3 Hz), 2.68 (1 H, br s), 1.55-1.21 (16 H, m), 1.26 (3 H, t, *J* 7.4 Hz), 1.24 (3 H, d, *J* 7.3 Hz), 0.88 (3 H, t, *J* 6.8 Hz); C (75 MHz, CDCl3) 204.2, 73.8, 53.6, 34.9, 31.8, 29.5, 29.5, 29.5, 29.2, 25.5, 23.2, 22.6, 15.1, 14.6, 14.0; m/z (ESI) 297 [M+Na]+.

# *S*-Ethyl (2*R*,3*R*)-2-methyl-3-hydroxytetradecathioate 80

# To a suspension of (*S*)-3,3’6,6’-tetraiodobinaphtol (2.36 g, 2.99 mmol) in toluene (50 mL) was added a solution of zirconium tetra-*tert*- butoxide (770 mg, 2.00 mmol) in toluene (50 mL) at room temperature. After stirring at this temperature for 3 h, a mixture of propanol (960 mg, 16.0 mmol) and water (70 mg, 4.0 mmol) in toluene (50 mL) was added. After stirred at room temperature for 30 min, the reaction mixture was cooled to 0 ˚C and then a solution of dodecanal (77) (3.68 g, 20.0 mmol) in toluene (37 mL) followed by a solution of silyl enol ether (79) (4.56 g, 24.0 mmol) in toluene (37 mL) at 0 ˚C. After stirred at this temperature for 48 h, the reaction mixture was quenched with saturated NaHCO3. After the organic layer was separated and aqueous layer was extracted with dichloromethane. The combined organic layer was washed with water and brine, dried over Na2SO4, and evaporated. The resulting residue was purified by silica gel column chromatography (hexane:benzene = 1:3) to give the corresponding adduct (80) [4.98 g, 83%, *syn/anti* = 12:88, 91% ee (*anti*)] as a colorless oil (Found: C, 67.71; H 11.07. C17H34O2S requires C, 67.49; H, 11.33%); max(film)/cm–1 3453, 2925, 2851, 1679, 1455, 1266, 958; H (300 MHz, CDCl3) 3.68 (1 H, m), 2.89 (2 H, q, *J* 7.3 Hz), 2.72 (1 H, m), 1.40-1.47 (2 H, m), 1.40-1.20 (24 H, m), 0.88 (3 H, t, *J* 6.6 Hz); C (75 MHz, CDCl3) 204.2, 73.9, 53.6, 34.9, 31.9, 29.6, 29.6, 29.5, 29.5, 29.3, 25.6, 23.2, 22.7, 15.2, 14.6, 14.1; *m/z* (EI) 241 [M–SCH2CH3]+.

# (4*S*,5*R*)-4-Methyl-5-(4-methoxybenzyloxy)-2-tetradecyne 83

# To a solution of the adduct (81) (1.49 g, 5.44 mmol) in diethyl ether (30 mL) was added lithium aluminum hydride (825 mg, 21.7 mmol) at 0 ˚C carefully. After stirred at room temperature for 1 h, the reaction mixture was cooled to 0 ˚C and quenched with aqueous Rochelle salt and diethyl ether was added. The mixture was warmed to room temperature and stirred vigorously for 3 h. The organic layer was separated, and the aqueous layer was extracted with EtOAc. The combined organic layer was washed with brine, dried over Na2SO4, and evaporated. The resulting residue was filtered through a short column chromatography on silica gel (hexane:EtOAc = 2:1 to 1:1) to give the corresponding diol, which was used without further purification. To a mixture of the diol and *p*-anisaldehyde dimethylacetal (1.82 mL, 10.7 mmol) in dichloromethane (21 mL) was added *p*-toluenesulfonic acid monohydrate (61.0 mg, 0.321 mmol) at room temperature. After stirred at this temperature for 12 h, the reaction mixture was quenched with saturated NaHCO3 and extracted with diethyl ether. The organic layer was washed with brine, dried over Na2SO4, and evaporated. The resulting residue was filtered through a short column of silica gel (hexane:EtOAc = 20:1) to give the corresponding acetal as a colorless oil, which was used without further purification. To a solution of the acetal in dichloromethane (20 mL) at –78 ˚C was added diisodutylaluminum hydride (17.0 mL, 16.2 mmol, 0.95 M in hexane) dropwise. After stirred at this temperature for 20 min, the reaction mixture was quenched with MeOH and then added aqueous Rochelle salt and EtOAc was added. The mixture was warmed to room temperature and stirred vigorously for 5 h. The organic layer was separated, and the aqueous layer was extracted with EtOAc. The combined organic layer was washed with brine, dried over Na2SO4, and evaporated. The resulting residue was purified by silica gel column chromatography (hexane:EtOAc = 5:1) to give the corresponding alcohol (1.74 g, 3 steps 96%) as a colorless oil. H (400 MHz, CDCl3) 7.25 (2 H, d, *J* 8.8 Hz), 6.87 (2 H, d, *J* 8.8 Hz), 4.53 (1 H, d, *J* 11.0 Hz), 4.37 (1 H, d, *J* 11.0 Hz), 3.79 (3 H, s), 3.64 (1 H, dd, *J* 11.0, 3.9 Hz), 3.54 (1 H, dd, *J* 11.0, 6.6 Hz), 3.38 (1 H, dt, *J* 6.6, 5.1 Hz), 2.78 (1 H, br s), 1.89 (1 H, m), 1.69-1.38 (2 H, m), 1.37-1.20 (14 H, m), 0.91 (3 H, d, *J* 6.8 Hz), 0.89 (3 H, t, *J* 6.8 Hz);C (100 MHz, CDCl3) 159.2, 130.4, 129.4, 113.8, 83.7, 71.3, 66.6, 55.1, 37.7, 31.8, 30.6, 29.9, 29.6, 29.5, 29.3, 24.3, 22.6, 14.0, 14.0; *m/z* (ESI) 359 [M+Na]+.

# To a solution of oxalyl chloride (0.410 mL, 4.78 mmol) in dichloromethane (15 mL) was added DMSO (0.680 mL, 9.57 mmol) at –78 ˚C slowly. The reaction mixture was stirred for 10 min, and then a solution of the alcohol (800 mg, 1.30 mmol) in dichloromethane (3.0 mL) was added. After the reaction mixture was stirred at this temperature for 1 h, triethylamine (2.65 mL, 19.1 mmol) was added. The mixture was warmed to 0 ˚C and further stirred for 1 h. The reaction was quenched with saturated NH4Cl and extracted with EtOAc. The combined organic layer was washed with brine and dried over Na2SO4 and evaporated to give the crude aldehyde, which was used without further purification. To a solution of tetrabromomethane (1.58 g, 4.76 mmol) in dichloromethane (15 mL) was added triphenylphosphine (2.49 g, 9.47 mmol) at 0 ˚C. To the reaction mixture was added a solution of the crude aldehyde in dichloromethane (3.0 mL) and stirred at this temperature for 5 min. The reaction mixture was directly purified by silica gel column chromatography (hexane:EtOAc = 50:1) to give the corresponding dibromide (1.16 g, 2 steps 99%) as a colorless oil. To a solution of the olefin (1.16 g, 2.37 mmol) in THF (12 mL) was added *n*-butyllithium (3.62 mL, 5.68 mmol, 1.57 M in hexane) at –78 ˚C. After stirring at this temperature for 45 min, methyl iodide (1.50 mL, 24.1 mmol) was added and the mixture was warmed to room temperature. After further stirred at this temperature for 30 min, the reaction mixture was quenched with saturated NH4Cl and extracted with diethyl ether. The combined organic layer was washed with brine, dried over Na2SO4, and evaporated. The resulting residue was purified by silica gel column chromatography (hexane:EtOAc = 50:1) to give the corresponding alkyne (83) (784 mg, 96%) as a colorless oil. H (300 MHz, CDCl3) 7.27 (2 H, d, *J* 8.7 Hz), 6.86 (2 H, d, *J* 8.7 Hz), 4.52 (1 H, d, *J* 11.3 Hz), 4.42 (1 H, d, *J* 11.3 Hz), 3.78 (3 H, s), 3.32 (1 H, dt, *J* 8.2, 4.2 Hz), 2.74 (1 H, m), 1.79 (3 H, d, *J* 2.4 Hz), 1.69-1.38 (2 H, m), 1.37-1.20 (14 H, m), 1.11 (3 H, d, *J* 7.3 Hz), 0.89 (3 H, t, *J* 7.1 Hz);C (75 MHz, CDCl3) 159.0, 130.8, 129.3, 113.6, 81.2, 76.6, 71.4, 55.1, 31.8, 30.6, 29.6, 29.6, 29.5, 29.3, 29.0, 26.0, 25.2, 22.6, 15.7, 14.0, 3.5.

# (4*S*,5*R*)-4-Methyl-5-(4-methoxybenzyloxy)-2-hexadecyne 82

# To a solution of the adduct (80) (4.39 g, 14.49 mmol) in THF (50 mL) was added lithium borohydride (1.58 g, 72.5 mmol) at –15 ˚C carefully. After stirred at 0 ˚C for 12 h, the reaction mixture was poured into diethyl ether and 0.5 M aqueous HCl solution. The organic layer was separated, and the aqueous layer was extracted with diethyl ether. The combined organic layer was washed with brine, dried over Na2SO4, and evaporated. The resulting residue was purified by silica gel column chromatography (hexane:EtOAc = 4:1) to give the corresponding diol (3.30 g, 93%) as a colorless oil. To a mixture of the diol (1.66 g, 6.78 mmol) and *p*-anisaldehyde dimethylacetal (3.71 mL, 20.3 mmol) in dichloromethane (18 mL) was added *p*-toluenesulfonic acid monohydrate (90 mg, 0.47 mmol) at room temperature. After stirred at this temperature for 12 h, the reaction mixture was quenched with saturated NaHCO3 and extracted with dichloromethane. The organic layer was washed with brine, dried over Na2SO4, and evaporated. The resulting residue was purified by silica gel column chromatography (hexane:EtOAc = 20:1) to give the corresponding acetal (1.68 g, 68%) as a colorless oil. To a solution of the acetal (1.51 g, 4.16 mmol) in dichloromethane (30 mL) at –78 ˚C was added diisobutylaluminum hydride (13.2 mL, 12.5 mmol, 0.95 M in hexane) dropwise. After stirred at 0 ˚C for 12 h, the reaction mixture was quenched with MeOH and then added aqueous Rochelle salt and diethyl ether was added. The mixture was warmed to room temperature and stirred vigorously for 5 h. The organic layer was separated, and the aqueous layer was extracted with diethyl ether. The combined organic layer was washed with brine, dried over Na2SO4, and evaporated. The resulting residue was purified by silica gel column chromatography (hexane:EtOAc = 20:1 to 6:1) to give the corresponding alcohol (1.39 g, 92%) as a colorless oil.

# To a mixture of the alcohol (6.09 g, 16.7 mmol) and 3,5-dinitrobenzoyl chloride (5.76 g, 25.0 mmol) and pyridine (3.39 mL, 41.8 mmol) in dichloromethane (140 mL) was added 4-dimethylaminopyridine (205 mg, 1.67 mmol) at 0 ˚C. After stirred at this temperature for 12 h, the reaction mixture was quenched with saturated NH4Cl, and extracted with diethyl ether. The organic layer was washed with H2O and brine, dried over Na2SO4, and evaporated. The resulting residue was recrystallized from hexane:diethyl ether = 2:1 at low temperature (­–15 ˚C) to give the desired stereoisomer [8.75 g, 67%, *syn/anti* = 2/98, >99% ee (*anti*)] as a yellow oil, which was used in the next step.

# To a solution of the benzoate (3.39 g, 6.07 mmol) in THF (30 mL), H2O (10 mL), and MeOH (5 mL) was added lithium hydroxide monohydrate (640 mg, 15.2 mmol) at room temperature. After stirred at this temperature for 1 h, the reaction mixture was quenched with saturated NH4Cl, and extracted with diethyl ether. The organic layer was washed with H2O and brine, dried over Na2SO4, and evaporated. The resulting residue was purified by silica gel column chromatography (hexane:EtOAc = 6:1) to give the alcohol (2.15 g, 97%) as a colorless oil (Found: C, 75.52; H 10.96. C23H40O3 requires C, 75.77; H, 11.06%); max(film)/cm–1 3432, 2926, 2856, 1613, 1514, 1466, 1250, 1039, 823; H (400 MHz, CDCl3) 7.24 (2 H, d, *J* 8.8 Hz), 6.85 (2 H, d, *J* 8.8 Hz), 4.51 (1 H, d, *J* 11.0 Hz), 4.37 (1 H, d, *J* 11.0 Hz), 3.76 (3 H, s), 3.61 (1 H, dd, *J* 11.0, 4.1 Hz), 3.53 (1 H, dd, *J* 11.0, 6.3 Hz), 3.38 (1 H, dt, *J* 6.1, 5.6 Hz), 3.07 (1 H, br s), 1.89 (1 H, m), 1.63-1.49 (2 H, m), 1.42-1.18 (18 H, m), 0.89 (3 H, d, *J* 7.1 Hz), 0.88 (3 H, t, *J* 6.8 Hz); C (100 MHz, CDCl3) 159.1, 130.3, 129.3, 113.7, 83.3, 71.2, 66.3, 55.0, 37.7, 31.8, 30.5, 30.1, 29.8, 29.5, 29.5, 29.5, 29.2, 24.3, 22.6, 14.0, 13.8.

# The alkyne (82) was prepared in a similar manner as the alkyne (83) (1.59 g, 3 steps 70%) (Found: C, 80.30; H 10.95. C17H34O2S requires C, 80.59; H, 10.82%); max(film)/cm–1 2924, 1614, 1513, 1464, 1248, 1039, 822; H (300 MHz, CDCl3) 7.27 (2 H, d, *J* 8.6 Hz), 6.86 (2 H, d, *J* 8.6 Hz), 4.52 (1 H, d, *J* 11.4 Hz), 4.42 (1 H, d, *J* 11.4 Hz), 3.79 (3 H, s), 3.32 (1 H, dt, *J* 8.3, 4.0 Hz), 2.75 (1 H, m), 1.79 (3 H, d, *J* 2.4 Hz), 1.70-1.38 (2 H, m), 1.38-1.25 (18 H, m), 1.11 (3 H, d, *J* 7.0 Hz), 0.88 (3 H, t, *J* 6.7 Hz); C (100 MHz, CDCl3) 159.1, 130.9, 129.4, 113.7, 81.7, 76.7, 71.5, 55.2, 31.9, 30.7, 29.7, 29.7, 29.6, 29.4, 29.1, 26.1, 22.7, 15.7, 14.1, 3.6.

# (1*R*,2*S*,3*R*)-1-[(4-Methoxybenzyloxy)methyl]-2,3-bis(4-methoxybenzyloxy)-4-hydroxybutyl (2*E*,4*R*,5*R*,6*E*,8*E*,10*S*,11*R*)-2,4,6,8,10-pentamethyl-5-hydroxy-11-

# (4-methoxybenzyloxy)-2,6,8-icosatrienoate 85

# To a solution of the alkyne (83) (87.0 mg, 0.253 mmol) in THF (1.0 mL) was added 9-BBN (1.0 mL, 0.50 mmol, 0.5 M in THF) at 0 ˚C. After stirring at room temperature for 12 h, a solution of the iodide (13) (248 mg, 0.211 mmol) in DMF (1.0 mL), H2O (1.0 mL), K3PO4 (224 mg, 1.06 mmol), and PdCl2(dppf) (34.0 mg, 0.0416 mmol) were added and stirred at 65 ˚C for 20 min. The reaction mixture was cooled to room temperature, diluted with EtOAc, and filtered through Celite. The filtrate was washed with saturated Na2HCO3, H2O, and brine, dried over Na2SO4, and evaporated. The resulting residue was filtered through a short column of silica gel (hexane:EtOAc = 5:1) to give the corresponding adduct as a yellow oil, which was used without further purification. To a solution of the adduct in THF (7.0 mL) was added 1 M aqueous HCl solution (3.0 mL) at room temperature. After stirred at this temperature for 2 days, the reaction mixture was quenched with saturated NaHCO3 and extracted with EtOAc. The combined organic layer was washed with brine, dried over Na2SO4, and evaporated. The resulting residue was purified by silica gel column chromatography (hexane:EtOAc = 3:2) to give the corresponding diol (85) (125 mg, 2 steps 58%) as a colorless oil. H (400 MHz, CDCl3) 7.26 (2 H, d, *J* 8.8 Hz), 7.22 (2 H, d, *J* 8.3 Hz), 7.20 (2 H, d, *J* 8.6 Hz), 7.20 (2 H, d, *J* 8.3 Hz), 6.86 (2 H, d, *J* 8.3 Hz), 6.85 (2 H, d, *J* 8.3 Hz), 6.83 (2 H, d, *J* 8.8 Hz), 6.82 (2 H, d, *J* 8.6 Hz), 6.75 (1 H, d, *J* 9.8 Hz), 5.83 (1 H, s), 5.31-5.17 (1 H, m), 5.25 (1 H, d, *J* 8.8 Hz), 4.62 (1 H, d, *J* 11.0 Hz), 4.56 (1 H, d, *J* 11.0 Hz), 4.54 (1 H, d, *J* 11.0 Hz), 4.52-4.38 (5 H, m), 3.98-3.54 (7 H, m), 3.79 (3 H, s), 3.78 (3 H, s), 3.78 (3 H, s), 3.77 (3 H, s), 3.24 (1 H, m), 2.82-2.64 (2 H, m), 1.89 (3 H, s), 1.77 (3 H, s), 1.73 (3 H, s), 1.57-1.18 (16 H, m), 1.00 (3 H, d, *J* 6.8 Hz), 0.90 (3 H, d, *J* 6.8 Hz), 0.88 (3 H, t, *J* 6.8 Hz);C (100 MHz, CDCl3) 167.2, 159.3, 159.2, 159.1, 159.0, 145.8, 134.5, 133.4, 132.7, 131.6, 131.2, 130.2, 130.1, 130.1, 129.9, 129.8, 129.7, 129.6, 129.3, 129.3, 129.2, 128.5, 113.7, 113.7, 113.7, 113.6, 82.8, 82.5, 79.0, 78.0, 73.8, 73.1, 72.7, 72.7, 71.4, 67.9, 61.8, 37.4, 35.5, 31.9, 31.1, 29.8, 29.6, 29.5, 29.3, 26.0, 22.6, 20.2, 17.0, 16.6, 16.1, 14.1, 12.8, 12.5; *m/z* (ESI) 1040 [M+NH4]+.

# (1*R*,2*S*,3*R*)-1-[(4-Methoxybenzyloxy)methyl]-2,3-bis(4-methoxybenzyloxy)-4-hydroxybutyl (2*E*,4*R*,5*R*,6*E*,8*E*,10*S*,11*R*)-2,4,6,8,10-pentamethyl-5-hydroxy-11-

# (4-methoxybenzyloxy)-2,6,8-docosatrienoate 84

# The diol (84) was prepared in a similar way as above (29.2 mg, 2 steps 53%). H (300 MHz, CDCl3) 7.28-7.19 (8 H, m), 6.88-6.81 (8 H, m), 6.74 (1 H, d, *J* 10.8 Hz), 5.83 (1 H, s), 5.28-5.20 (2 H, m), 4.63 (1 H, d, *J* 11.0 Hz), 4.60-4.38 (7 H, m), 3.93-3.61 (7 H, m), 3.79 (3 H, s), 3.79 (3 H, s), 3.79 (3 H, s), 3.78 (3 H, s), 3.24 (1 H, m), 2.80-2.66 (2 H, m), 1.89 (3 H, s), 1.77 (3 H, s), 1.73 (3 H, s), 1.60-1.14 (20 H, m), 0.99 (3 H, d, *J* 6.8 Hz), 0.93-0.79 (6 H, m); *m/z* (ESI) 1073 [M+Na]+.

# (2*S*,3*S*,4*R*)-2,3,5-Trihydroxy-4-[[(2*E*,4*R*,6*E*,8*E*,10*S*,11*R*)-1,5-dioxo-2,4,6,8,10-pentamethyl-11-hydroxy-2,6,8-icosatrienyl]oxy]pentanoic acid 29

# To a solution of the diol (85) (49.5 mg, 0.0486 mmol) and pyridine (0.020 mL, 0.25 mmol) in dichloromethane (1.0 mL) was added Dess–Martin periodinane (82.0 mg, 0.193 mmol) at 0 ˚C. After stirred at room temperature for 2 h, the reaction mixture was diluted with EtOAc. The organic layer was washed with saturated NaHCO3, 10% NaHSO3, and brine, dried over Na2SO4, and evaporated. The residue was filtered through a short column of silica gel (hexane:EtOAc = 3:1) to give the crude aldehyde as a colorless oil, which was used without further purification. To a solution of the crude aldehyde in *tert*-butyl alcohol (0.6 mL) and 2-methyl-2-butene (0.4 mL) was added a mixture of sodium chlorite (97.0 mg) and sodium dihydrogenphosphate (97.0 mg) in water (2.5 mL). After stirred for 4 h at room temperature, the reaction mixture was diluted with EtOAc and 0.5 M KHSO4. The organic layer was separated, and the aqueous layer was extracted with EtOAc. The combined organic layer was washed with 10% NaHSO3 and brine, dried over Na2SO4, and evaporated. The resulting residue was purified by silica gel column chromatography (chloroform:MeOH = 15:1) to give the corresponding acid (27.5 mg, 2 steps 55%) as a colorless oil. H (400 MHz, CDCl3) 7.26-7.02 (8 H, m), 6.99 (1 H, s), 6.94-6.70 (9 H, m), 5.77 (1 H, d, *J* 8.8 Hz), 5.14 (1 H, m), 4.64-4.15 (9 H, m), 4.08-3.97 (1 H, m), 3.85-3.65 (3 H, m), 3.79 (3 H, s), 3.77 (3 H, s), 3.75 (3 H, s), 3.73 (3 H, s), 3.28 (1 H, m), 2.76 (1 H, m), 1.97 (3 H, s), 1.85 (3 H, s), 1.82 (3 H, s), 1.45-1.17 (16 H, m), 1.13 (3 H, d, *J* 6.8 Hz), 0.92-0.88 (3 H, m), 0.88 (3 H, t, *J* 6.8 Hz); C (100 MHz, CDCl3) 203.6, 166.4, 159.3, 159.1, 144.3, 142.7, 141.4, 133.5, 131.9, 131.2, 130.9, 130.1, 130.0, 129.7, 129.3, 127.6, 113.8, 113.7, 113.7, 82.4, 74.5, 72.7, 72.2, 71.8, 55.2, 55.2, 55.2, 55.2, 39.7, 36.3, 31.9, 31.6, 29.8, 29.6, 29.5, 29.3, 25.8, 22.7, 18.6, 16.6, 16.4, 14.1, 13.4, 12.8; *m/z* (ESI) 1052 [M+NH4]+..

# The corresponding acid from 84 was prepared in a similar way as above (14.1 mg, 2 steps 50%).

# H (400 MHz, CDCl3) 7.29-7.02 (8 H, m), 6.97 (1 H, s), 6.93-6.60 (9 H, m), 5.63 (1 H, d, *J* 9.3 Hz), 5.14 (1 H, m), 4.63-4.13 (9 H, m), 4.02 (3 H, m), 3.82-3.55 (3 H, m), 3.78 (3 H, s), 3.76 (3 H, s), 3.73 (3 H, s), 3.70 (3 H, s), 3.27 (1 H, m), 2.76 (1 H, m), 1.93 (3 H, s), 1.84 (3 H, s), 1.80 (3 H, s), 1.58-1.16 (20 H, m), 1.03 (3 H, d, *J* 6.8 Hz), 0.93-0.87 (3 H, m), 0.88 (3 H, t, *J* 6.8 Hz).

# To a solution of the acid (27.5 mg, 0.0267 mmol) in dichloromethane (3.0 mL) was added BCl3 (0.13 mL, 0.13 mmol, 1.0 M in heptane) at –78 ˚C. After stirred at this temperature for 5 min, the reaction mixture was quenched with saturated NaHCO3 and poured into aqueous citric acid and EtOAc was added. The organic layer was separated, and the aqueous layer was extracted with EtOAc. The combined organic layer was washed with brine, dried over Na2SO4, and evaporated. The resulting residue was purified by preparative thin layer chromatography on silica gel column (chloroform:MeOH:H2O = 4:1:0.1) to give the derivative (29) (3.5 mg, 24%) as a colorless oil.H (400 MHz, CDCl3) 6.97 (1 H, s), 6.85 (1 H, d, *J* 8.3 Hz), 5.61 (1 H, d, *J* 9.7 Hz), 4.90 (1 H, m), 4.28 (1 H, m), 4.17 (1 H, m), 4.04 (1 H, m), 3.94-3.70 (2 H, m), 3.44 (1 H, m), 2.53 (1 H, m), 1.90 (3 H, s), 1.87 (3 H, s), 1.87 (3 H, s), 1.42-1.15 (16 H, m), 1.01 (3 H, d, *J* 6.6 Hz), 0.87 (3 H, t, *J* 7.1 Hz); HRMS (ESI) calcd. for C30H49O9 (M-H)- 553.3377, found 553.3376.

# (2*S*,3*S*,4*R*)-2,3,5-Trihydroxy-4-[[(2*E*,4*R*,6*E*,8*E*,10*S*,11*R*)-1,5-dioxo-2,4,6,8,10-pentamethyl-11-hydroxy-2,6,8-docosatrienyl]oxy]pentanoic acid 28

# The derivative (28) was prepared in a similar way as the derivative (29) (25%). H (400 MHz, CDCl3) 6.97 (1 H, s), 6.85 (1 H, d, *J* 8.3 Hz), 5.61 (1 H, d, *J* 9.7 Hz), 4.90 (1 H, m), 4.28 (1 H, m), 4.17 (1 H, m), 4.04 (1 H, m), 3.94-3.70 (2 H, m), 3.44 (1 H, m), 2.53 (1 H, m), 1.90 (3 H, s), 1.87 (3 H, s), 1.87 (3 H, s), 1.42-1.15 (16 H, m), 1.01 (3 H, d, *J* 6.6 Hz), 0.87 (3 H, t, *J* 7.1 Hz); HRMS (ESI) calcd. for C30H49O9 (M-H)- 553.3377, found 553.3376.

# Synthesis of derivative 30

**(2*S*,3*S*)-3-Undecyloxirane-2-methanol 86**

To a solution of (carbethoxymethylidene)triphenylphosphrane (14.0 g, 40.2 mmol) in dichloromethane (20 mL) was added a solution of dodecanal **7** (3.70 g, 20.1 mmol) in dichloromethane (20 mL) at room temperature. After the solution was stirred for 15 h at room temperature, a solution was diluted with hexane. After the reaction mixture was filtered through Celite, the filtrate was evaporated. The residue was purified by column chromatography on silica gel (hexane:EtOAc = 19:1) to give the corresponding ester (4.95 g, 97%) as a colourless oil.H (300 MHz, CDCl3) 6.97 (1 H, dt, *J* 15.5, 7.0 Hz), 5.81 (1 H, dt, *J* 15.6, 1.6 Hz), 4.18 (2 H, q, *J* 7.1 Hz), 2.19 (2 H, ddt, *J* 7.2, 7.2, 1.5 Hz), 1.45 (2 H, m), 1.34-1.22 (16 H, m), 1.29 (3 H, t, *J* 7.1 Hz), 0.88 (3 H, t, *J* 6.7 Hz).

To a solution of the ester(4.95 g, 19.5 mmol) in dichloromethane (90 mL) was added diisobutylaluminum hydride (61 mL, 58.4 mmol, 0.95 M solution in hexane) at –78 °C. After stirred for 30 min at the same temperature, the reaction was quenched with methanol. After an aqueous Rochelle salt solution and diethyl ether were added, the mixture was warmed to room temperature and stirred vigorously until the resulting white slurry was completely dissolved. After the phases were separated, the aqueous layer was extracted with diethyl ether. The combined organic extract was washed with water and brine, dried over Na2SO4, and evaporated. The residue was purified by column chromatography on silica gel (hexane/EtOAc) to give the corresponding alcohol (3.65 g, 88%) as a colorless oil.H (300 MHz, CDCl3) 5.66 (2 H, m), 4.08 (2 H, d, *J* 4.9 Hz), 2.03 (2 H, dt, *J* 6.6, 5.9 Hz), 1.43-1.20 (16 H, m), 0.88 (3 H, t, *J* 6.7 Hz).

To a solution of tetraisopropyl orthotitanate (8.81 g, 31.0 mmol) in dichloromethane (20 mL) was added a solution of D-tartaric acid diethyl ester (6.38 g, 31.0 mmol) in dichloromethane (8 mL) at –23 °C. After the mixture was stirred for 30 min at the same temperature, a solution of the alcohol(2.63 g, 12.4 mmol) in dichloromethane (10 mL) was added followed by *tert*-butylhydroperoxide (20 mL, 40.0 mmol, 2.0 M solution in dichloromethane,). After stirred for 5 h at –23 °C, the reaction was quenched with 10% aqueous tartaric acid. After stirred for 30 min, the phases were separated, and the aqueous layer was extracted with dichloromethane. The combined organic extract was washed with water and brine, dried over Na2SO4, and evaporated. To the residue was added 1 N aqueous NaOH and the mixture was stirred or 30 min. The mixture was extracted with dichloromethane and the combined organic extract was washed with water and brine, dried over Na2SO4, and evaporated. The residue was purified by column chromatography on silica gel (hexane/EtOAc) to give **86** (2.76 g) as a white powder.H (400 MHz, CDCl3) 3.91 (1 H, ddd, *J* 12.7, 5.1, 2.4 Hz), 3.62 (1 H, ddd, *J* 12.0, 6.8, 4.4 Hz), 2.98-2.89 (2 H, m), 1.92 (1 H, br s), 1.50-1.20 (18 H, m), 0.88 (3 H, t, *J* 6.8 Hz).

**(3*R*)-3-(4-Methoxybenzyloxy)-1-tetradecanol 87**

To a stirred solution of Red-Al (8.25 mL, 42.3 mmol, a solution in toluene,) in tetrahydrofuran (30 mL) was added **86** (2.76 g, 12.1 mmol) in tetrahydrofuran (30 mL) at 0 °C. After the mixture was stirred for 7 h at the same temperature, the solution of resulting **48** (7.1 g) in diethyl ether (40 mL) was added to the mixture. After stirred for 12 h at 0 °C, the reaction was quenched with 1 N hydrochloric acid. To the mixture diethyl ether was added and the mixture was stirred for 1 h at room temperature. The mixture was extracted with diethyl ether, and the organic extract was washed with water and brine, dried over Na2SO4, and evaporated. The residue was purified by column chromatography on silica gel (hexane/EtOAc) to give the corresponding diol (2.52 g, 91%) as a colorless oil.

To a mixture of the diol (2.52 g, 10.9 mmol) and *p*-anisaldehyde dimethylacetal (3.99 g, 11.8 mmol) in dichloromethane (15 mL) was added *p*-toluenesulfonic acid (125 mg, 0.657 mmol) at room temperature. After stirred for 15 h at the same temperature, the reaction was quenched with an aqueous sodium hydrogen carbonate solution, and the aqueous layer was extracted with dichloromethane. The extract was washed with water and brine, dried over Na2SO4, and evaporated. The residue was purified by column chromatography on silica gel (hexane/EtOAc) to give the acetal (3.42 g, 90%) as a colorless oil.H (300 MHz, CDCl3) 7.46-7.38 (2 H, m), 7.00-6.84 (2 H, m), 5.45 (1 H, s), 4.24 (1 H, ddd, *J* 11.4, 5.0, 2.4 Hz), 3.93 (1 H, dt, *J* 11.6, 2.6 Hz), 3.82-3.76 (1 H, m), 3.79 (3 H, 2.98-2.89 (2 H, m), 1.92 (1 H, brs), 1.50-1.20 (18 H, m), 0.88 (3 H, t, *J* 6.8 Hz).

To the solution of the acetal (3.42 g, 9.81 mmol) in dichloromethane (20 mL) was added diisobutylaluminum hydride (30.9 mL, 29.4 mmol, 0.95 M solution in hexane) at –78 °C. After stirred for 20 h at 0 °C, the reaction was quenched with methanol. After an aqueous Rochelle salt solution and diethyl ether were added, the mixture was warmed to room temperature and stirred vigorously until the resulting white slurry was completely dissolved. After the phases were separated, the aqueous layer was extracted with diethyl ether. The combined organic extract was washed with water and brine, dried over Na2SO4, and evaporated. The residue was purified by column chromatography on silica gel (hexane/EtOAc) to give corresponding alcohol **87** (3.38 g, 98%) as a colorless oil.H (400 MHz, CDCl3) 7.27-7.21 (2 H, m), 6.88-6.83 (2 H, m), 4.51 (1 H, d, *J* 11.3 Hz), 4.39 (1 H, d, *J* 11.3 Hz), 3.81-3.57 (6 H, m), 2.45 (1 H, br s), 1.80-1.20 (18 H, m), 0.86 (3 H, t, *J* 6.9 Hz);C (100 MHz, CDCl3) 159.2, 130.5, 129.4, 113.8, 78.4, 70.5, 60.9, 55.2, 35.7, 33.4, 31.9, 29.8, 29.7, 29.62, 29.59, 29.3, 25.3, 22.7, 14.1.

**(2*E*,4*E*,7*R*)-2,4-Dimethyl-7-(4-methoxybenzyloxy)-2,4-octadecadiene-1-ol 88**

The correponding aldehyde was prepared in a similar manner (Swern oxidation) as the aldehyde shown above (2.83 g, 84%).

To a solution of (carbethoxyethylidene)triphenylphosphorane (8.80 g, 24.3 mmol) in THF (30 mL) was added the aldehyde (2.83 g, 8.12 mmol) at room temperature. After the solution was heated for 12 h at reflux, the solution was diluted with hexane. After the reaction mixture was filtered through Celite, the filtrate was evaporated. The residue was purified by column chromatography on silica gel (hexane/EtOAc) to give the corresponding ethyl ester as a colorless oil.

The corresponding alcohol was prepared in a similar manner (DIBAL reduction ) as shown above (2.67 g, 2 steps 84%). H (400 MHz, CDCl3) 7.27-7.22 (2 H, m), 6.89-6.82 (2 H, m), 5.50-5.40 (1 H, m), 4.48 (1 H, d, *J* 11.2 Hz), 4.41 (1 H, d, *J* 11.2 Hz), 3.99 (2 H, s), 3.79 (3 H, s), 3.42-3.36 (1 H, m), 2.32-2.26 (2 H, m), 1.65 (3 H, s), 1.62-1.20 (20 H, m), 0.88 (3 H, t, *J* 6.9 Hz); C (100 MHz, CDCl3) 159.0, 136.4, 131.0, 129.4, 122.1, 122.0, 113.0, 78.4, 70.5, 68.9, 55.2, 34.0, 31.93, 31.90, 29.7, 29.64, 29.62, 29.3, 25.5, 22.7, 14.1.

To a mixture of the alcohol (2.60 g, 6.66 mmol), *N*-methyl morphorine *N*-oxide (1.17 g, 9.99 mmol) and molecular sieves 4A (1.00 g) in dichloromethane (10 mL) were added tetrapropylammonium perruthenate (TPAP, 234 mg, 0.666 mmol) at room temperature. After stirred for 1 h at the same temperature, the reaction mixture was filtered through Celite, and then the filtrate was washed with aqueous sodium sulfite, water, and brine. The organic layer was dried over Na2SO4, filtered, and evaporated. The residue was purified by column chromatography on silica gel (hexane/EtOAc) to give the corresponding aldehyde (2.30 g, 89%) as a colorless oil.

The corresponding ethyl ester was prepared in a similar manner (Wittig reaction) as shown above.

The corresponding alcohol **88** was prepared in a similar manner (DIBAL reduction) as shown above (1.98 g, 2 steps 78%). H (300 MHz, CDCl3) 7.28-7.23 (2 H, m), 6.89-6.84 (2 H, m), 5.89 (1 H, s), 5.48-5.23 (1 H, m), 4.49 (1 H, d, *J* 11.2 Hz), 4.42 (1 H, d, *J* 11.2 Hz), 4.03 (2 H, s), 3.80 (3 H, s), 3.49-3.37 (1 H, m), 2.43-2.25 (2 H, m), 1.81 (3 H, d, *J* 1.2 Hz), 1.75 (3 H, d, *J* 0.8 Hz), 1.54-1.20 (20 H, m), 0.88 (3 H, t, *J* 6.9 Hz). C (75 MHz, CDCl3) 159.0, 134.2, 131.6, 131.1, 129.4, 129.3, 126.5, 113.6, 78.6, 70.6, 69.5, 55.2, 34.1, 32.6, 31.9, 29.7, 29.64, 29.63, 29.4, 25.5, 22.7, 17.0, 15.4, 14.1.

***S*-Ethyl (2*S*,3*S*,4*E*,6*E*,9*R*)-2,4,6-trimethyl-3-hydroxy-9-(4-methoxybenzyloxy)-4,6-icosadienethioate 89**

To a stirred solution of alcohol **88** (1.92 g, 4.46 mmol) in dichloromethane (12 mL) was added manganese(IV) oxide (8.00 g, 9.20 mmol) at room temperature. After stirred for 15 h at the temperature, the reaction mixture was filtered, and evaporated. The residue was purified by column chromatography on silica gel (hexane/EtOAc) to give the corresponding aldehyde (1.82 g, 95%) as a colorless oil.

To a mixture of tin(II) trifluoromethanesulfonate (3.77 g, 9.04 mmol) and (*S*)-1-methyl-2-[(*N*-1-naphthylamino)-methyl]pyrrolidine (2.61 g, 10.8 mmol) in dichloromethane (18 mL) was added a solution of dibutyltin diacetate (3.49 g, 9.95 mmol) in dichloromethane (8 mL) at room temperature. After the solution was cooled to –78 °C, a solution of [[(*Z*)-1-(ethylthio)-1-propenyl]oxy]trimethylsilane **79** (1.62 g, 8.51 mmol) in dichloromethane (3 mL) was added followed by a solution of the aldehyde (1.82 g, 4.25 mmol) in dichloromethane (10 mL). After stirred for 16 h at –78 °C, the reaction was quenched with saturated NaHCO3 solution, and the aqueous layer was extracted with dichloromethane. The extract was washed with water and brine, dried over Na2SO4, filtered, and evaporated. The residue was purified by column chromatography on silica gel (hexane/EtOAc) to give **89** (1.82 g, 78%) as a colorless oil (Found: C, 72.22; H, 10.12. C33H54O4S requires C, 72.48; H, 9.95%); H (400 MHz, CDCl3) 7.27-7.21 (2 H, m), 6.91-6.81 (2 H, m), 5.94 (1 H, s), 5.35-5.25 (1 H, m), 4.49 (1 H, d, *J* 11.2 Hz), 4.41 (1 H, d, *J* 11.2 Hz), 4.31 (1 H, d, *J* 5.1 Hz), 3.79 (3 H, s), 3.42-3.39 (1 H, m), 2.88-2.80 (3 H, m), 2.44 (brs, 1 H), 2.36-2.29 (2 H, m), 1.75 (3 H, s), 1.72 (3 H, s), 1.55-1.15 (26 H, m), 0.88 (3 H, t, *J* 6.7 Hz); C (100 MHz, CDCl3) 203.4, 159.0, 133.4, 133.1, 131.0, 130.7, 129.2, 126.4, 113.6, 78.6, 77.2, 70.5, 55.2, 51.3, 34.1, 32.6, 31.9, 29.7, 29.62, 29.60, 29.3, 25.4, 23.2, 22.6, 17.1, 14.6, 14.5, 14.1, 11.8.

**(1*R*,2*S*,3*R*)-1-[(4-Methoxybenzyloxy)methyl]-2,3-bis(4-methoxybenzyloxy)-4-(*tert*-butyldimethylsiloxy)butyl (2*E*,4*R*,5*S*,6*E*,8*E*,11*R*)-2,4,6,8-tetramethyl-5-(triethylsiloxy)-11-(4-methoxybenzyloxy)-2,6,8-docosatrienoate 90**

To a mixture of **89** (1.82 g, 0.95 mmol) and 2,6-lutidine (1.78 g, 16.6 mmol) in dichloromethane (18 mL) was added a solution of triethylsilyl trifluoromethanesulfonate (1.76 g, 6.66 mmol) in dichloromethane (3 mL) at 0 °C. After stirred for 2 h at room temperature, the reaction was quenched with saturated NaHCO3, and the aqueous layer was extracted with dichloromethane. The extract was washed with water and brine, dried over Na2SO4, filtered, and evaporated. The residue was purified by column chromatography on silica gel (hexane/EtOAc) to give the corresponding thioester (1.88 g, 85%) as a colorless oil.

To a solution of the thioester(1.88 g, 2.84 mmol) in dichloromethane (10 mL) was added diisobutylaluminum hydride (6.0 mL, 5.68 mmol, 0.95 M solution in hexane,) at –78 °C. After stirred for 5 min at the same temperature, the reaction was quenched with methanol. After an aqueous Rochelle salt solution and diethyl ether were added, the mixture was warmed to room temperature and stirred vigorously until the resulting white slurry was completely dissolved. After the phases were separated, the aqueous layer was extracted with diethyl ether. The combined organic extract was washed with water and brine, dried over Na2SO4, and evaporated. The residue was purified by column chromatography on silica gel (hexane/EtOAc) to give the aldehyde (1.63 g, 95%) as a colorless oil.

The correponding ester was prepared in a similar manner (Wittig reaction) as the ethyl ester shown above (1.83 g, 98%).

The corresponding alcohol was prepared in a similar manner (DIBAL reduction) as shown above (1.50 g, 87%).H (300 MHz, CDCl3) 7.27-7.23 (2 H, m), 6.88-6.84 (2 H, m), 5.71 (1 H, s), 5.30-5.22 (1 H, m), 5.18-5.06 (1 H, m), 4.49 (1 H, d, *J* 11.2 Hz), 4.41 (1 H, d, *J* 11.2 Hz), 3.91 (2 H, s), 3.80 (3 H, s), 3.70 (1 H, d, *J* 7.7 Hz), 3.46-3.35 (1 H, m), 2.63-2.50 (1 H, m), 2.40-2.25 (2 H, m), 1.68 (3 H, s), 1.66 (3 H, d, *J* 1.2 Hz), 1.65 (3 H, d, *J* 1.3 Hz), 1.55-1.20 (20 H, m), 1.00-0.80 (15 H, m), 0.58 (6 H, q, *J* 7.8 Hz); C (75 MHz, CDCl3) 159.0, 136.6, 133.7, 133.6, 131.1, 130.1, 129.3, 129.3, 125.6, 113.7, 83.0, 78.7, 70.5, 69.1, 55.2, 34.1, 32.6, 31.9, 29.8, 29.6, 29.4, 25.4, 22.7, 17.1, 17.0, 14.1, 13.8, 13.4, 6.9, 4.9.

The corresponding aldehyde was prepared in a similar manner (MnO2 oxidation) as shown above.

To a solution of the aldehyde (760 mg, 1.19 mmol) in *tert*-butyl alcohol (19 mL) were added 2-methyl-2-butene (11 mL) and a mixture of sodium chlorite (2.37 g) and sodium dihydrogenphospate dihydrate (2.37 g) in water (19 mL). After stirred for 15 h at room temperature, the reaction mixture was diluted with water and EtOAc. After the phases were separated, the aqueous layer was extracted with EtOAc. The combined organic extract was washed with water, an aqueous citric acid solution, and brine, dried over Na2SO4, and evaporated. The residue was purified by column chromatography on silica gel (chloroform:MeOH = 40:1) to give the corresponding carboxylic acid (711 mg, 91%) as a colorless oil.

To a mixture of the carboxylic acid(643 mg, 0.98 mmol), *N, N*-dimethylaminopyridine (349 mg, 2.86 mmol), and dimethylaminopyridine hydrochloride (311 mg, 1.96 mmol) in dichloromethane (6 mL) was added a solution of dicyclohexyl carbodiimide (404 mg, 1.96 mmol) in dichloromethane (1 mL) followed by a solution of **5** (920 mg, 1.47 mmol) in dichloromethane (4 mL). The solution was heated at reflux for 48 h. After cooling to room temperature, the solvent was evaporated and the residue was dissolved in EtOAc. The solution was washed with a 1 M aqueous HCl solution, water, and brine, dried over Na2SO4, and evaporated. The residue was filtered through a short column of silica gel (hexane:EtOAc = 20:1) to give ester **90** (808 mg, 65%) as a colorless oil.

**(2*S*,3*S*,4*R*)-2,3,5-Trihydroxy-4-[[(2*E*,4*R*,6*E*,8*E*,11*R*)-1,5-dioxo-2,4,6,8-tetramethyl-11-hydroxy-2,6,8-docosatrienyl]oxy]pentanoic acid 30**

To a solution of **90** in THF (20 mL) was added a 1 M aqueous HCl solution (5.4 mL) at room temperature. After stirred for 12 h at the same temperature, the reaction was quenched with saturated NaHCO3, and the aqueous layer was extracted with EtOAc. The extract was washed with water and brine, dried over Na2SO4, and evaporated. The residue was purified by column chromatography on silica gel ( hexane:EtOAc = 4:1 to 1:1) to give the corresponding diol (496 mg, 84% for 2 steps) as a colorless oil. H (300 MHz, CDCl3) 7.25-7.15 (8 H, m), 6.87-6.79 (8 H, m), 6.68 (1 H, brd, *J* 10.3 Hz), 5.81 (1 H, brs), 5.35-5.20 (2 H, m), 4.60-4.35 (8 H, m), 3.83-3.50 (19 H, m), 3.40-3.30 (1 H, m), 2.79-2.70 (1 H, m), 2.26-2.24 (2 H, m), 2.15 (1 H, brs), 1.86 (3 H, s), 1.69 (3 H, s), 1.65 (3 H, s), 1.50-1.20 (20 H, m), 1.08 (3 H, d, *J* 6.6 Hz), 0.88 (3 H, q, *J* 6.8 Hz); C (75 MHz, CDCl3) 167.2, 159.2, 159.1, 159.0, 145.0, 135.2, 133.3, 131.1, 130.9, 130.2, 130.1, 129.7, 129.5, 129.2, 126.7, 113.7, 113.6, 80.9, 79.1, 78.3, 73.9, 73.1, 72.7, 70.5, 67.9, 61.8, 55.1, 37.2, 34.0, 32.6, 31.8, 29.7, 29.6, 29.3, 25.4, 22.6, 17.1, 15.2, 14.0, 13.8, 12.5.

To a mixture of Dess-Martin periodinane (203 mg, 0.477 mmol) and pyridine (47.1 mg, 0.595 mmol) in dichloromethane (1 mL) was added a solution of the diol (124 mg, 0.119 mmol) in dichloromethane (1 mL) at room temperature. After stirred for 2 h at the same temperature, the reaction mixture was diluted with saturated NaHCO3 and EtOAc. After the phases were separated, the aqueous layer was extracted with EtOAc. The combined organic extract was washed with a 1 M Na2S2O3 solution, water, and brine, dried over Na2SO4, and evaporated. The residue was used without further purification.

To a solution of the aldehyde in *tert*-butyl alcohol (2.3 mL) were added 2-methyl-2-butene (1.4 mL) and a mixture of sodium chlorite (238 mg) and sodium dihydrogenphosphate dihydrate (238 mg) in water (2.3 mL). After stirred for 12 h at room temperature, the reaction mixture was diluted with water and EtOAc. After the phases were separated, the aqueous layer was extracted with EtOAc. The combined organic extract was washed with water, an aqueous citric acid solution and brine, dried over Na2SO4, and evaporated. The residue was purified by preparative thin layer chromatography on silica gel (chloroform:MeOH = 12:1) to give the corresponding carboxylic acid (44.6 mg, 36% for 2 steps) as a colorless oil.

To a solution of the carboxylic acid (44.6 mg, 0.0425 mmol) in dichloromethane (1.5 mL) was added BCl3 (0.21 mL, 0.21 mmol, 1.0 M solution in heptane) at –78 °C. After stirred for 5 min at the same temperature, the reaction was quenched with saturated NaHCO3. After an aqueous citric acid solution and EtOAc were added, the mixture was warmed to room temperature and stirred for 30 min. After the phases were separated, the aqueous layer was extracted with EtOAc. The combined organic extract was washed with water and brine, dried over Na2SO4, and evaporated. The residue was purified by preparative thin layer chromatography on silica gel (chloroform:MeOH:H2O = 2:1:0.1) to give **30** (3.0 mg, 12%) as a colorless oil. H(400 MHz; CD­­3OD) 7.10 (1 H, s), 6.77 (1 H, d, *J* 8.6 Hz), 5.80 (1 H, s), 4.63 (1 H, m), 4.36 (1 H, m), 4.24 (1 H, m), 4.10 (1 H, m), 3.78-3.95 (2 H, m), 3.63 (1 H, m), 2.34 (2 H, m), 1.96 (3 H, s), 1.93 (3 H, s), 1.89 (3 H, s), 1.59 (2 H, m), 1.20 (3 H, m), 1.20-1.50 (18 H, m), 0.89 (3 H, t, *J* 6.9 Hz); HRMS (ESI) calcd. for C31H51O9 (M-H)- 567.3533, found 567.3544.

# Synthesis of derivative 31

# Ethyl (2*E*,4*S*)-4-methyl-2-hexenoate 92

# To a solution of oxalyl chloride (15.8 g, 120 mmol) in dichloromethane (100 mL) was added a solution of dimethyl sulfoxide (14.5 g, 188 mmol) in dichloromethane (80 mL) at –78 °C. After stirring for 5 min at –78 °C, a solution of 91 (5.5 g, 63 mmol) in dichloromethane (140 mL) was added. After stirring for 1 h at –78 °C, a solution of the triethylamine (37.9 g, 375 mmol) in dichloromethane (80 mL) was added, and the mixture was warmed to room temperature. After stirred for 1 h at room temperature, the reaction was quenched with water, and the aqueous layer was extracted with diethyl ether. The extract was washed with water and brine, dried over Na2SO4, and evaporated. The corresponding aldehyde was given. Then, the mixture of (carbethoxymethylidene)triphenylphosphorane (45.4 g, 125 mmol) and the aldehyde (86.0 mg, 0.14 mmol) in dichloromethane (50 mL) was stiring for 12 h at room temperature. The solution was diluted with hexane. After the reaction mixture was filtered through Celite, the filtrate was evaporated. The residue was purified by column chromatography on silica gel (hexane:EtOAc = 19:1) to give corresponding ester 92 (6.8 g, 70% for 2 steps, *E*/*Z* = >95/5) as a colorless oil. H 6.87 (1 H, dd, *J* 14.4, 7.7 Hz), 5.78 (1 H d, *J* 14.4 Hz), 4.22-4.11 (2 H m), 2.26-2.15 (1 H, m), 1.50-1.23 (5 H m), 1.04 (3 H, d, *J* 6.8 Hz), 0.882 (3 H, t, *J* 7.3 Hz); C 166.9, 154.3, 119.1, 60.1, 30.1, 28.7, 20.1, 14.2, 11.6.

# (2*S*,3*R*,4*S*)-2,4-Dimethyl-1,3-hexanediol 93

# To a solution of ester 92 (9.0 g, 58 mmol) in dichloromethane (120 mL) was added diisobutylaluminum hydride (184 mL, 175 mmol, 0.95 M solution in hexane) at –78 °C. After stirred for 15 min at –78 °C, the reaction was quenched with methanol. After an aqueous Rochelle salt solution and diethyl ether were added, the mixture was warmed to room temperature and stirred vigorously until the resulting white slurry was completely dissolved. After the phases were separated, the aqueous layer was extracted with diethyl ether. The combined organic extract was washed with water and brine, dried over Na2SO4, and evaporated. The residue was purified by column chromatography on silica gel (hexane:EtOAc = 9:1) to give the corresponding alcohol (7.8 g, 72%) as a colorless oil. H 5.60-5.57 (2 H, m), 4.10 (2 H, d, *J* 4.6 Hz), 2.00-1.35 (1 H, m), 1.35-1.24 (2 H, m), 0.99 (3 H, d, *J* 7.2 Hz), 0.88 (3 H, t, *J* 7.4 Hz); C 138.9, 127.2, 63.8, 37.9, 29.5, 19.9, 11.7.

# To a solution of tetraisopropyl orthotitanate (23.7 g, 83.4 mmol) in dichloromethane (20 mL) was added a solution of D-tartaric acid diethyl ester (17.2 g, 83.4 mmol) in dichloromethane (20 mL) at –23 °C. After the mixture was stirred for 30 min at the same temperature, a solution of the alcohol (4.8 g, 41.7 mmol) in dichloromethane (40 mL) was added followed by *tert*-butylhydroperoxide (54.2 mL, 108.4 mmol, 2.0 M solution in dichloromethane,). After stirred for 3 h at –23 °C, the reaction was quenched with 10% aqueous tartaric acid. After the phases were separated, the aqueous layer was extracted with dichloromethane. The combined organic extract was washed with water and brine, dried over Na2SO4, and evaporated. The residue was purified by column chromatography on silica gel (hexane:EtOAc = 9:1) to give the corresponding epoxyalcohol (4.3 g, 86%). H 3.92 (1 H, dd, *J* 12.4, 2.5 Hz), 3.62 (1 H, dd, *J* 12.6, 4.3 Hz), 3.00-2.98 (1 H, m), 2.73 (1 H, dd, *J* 7.2, 2.2 Hz), 2.03 (1 H, s), 1.50-1.18 (3 H, m), 1.02 (3 H, d, *J* 6.3 Hz), 0.93 (3 H, t, *J* 7.2 Hz); C 61.8, 60.4, 58.4, 37.1, 26.5, 16.8, 11.7.

# To a suspension of copper (I) iodide (130 g, 685 mmol) in diethyl ether (40 mL) was added methyllithium (950 mL, 1.04 mol, 1.1 M solution of diethyl ether) at –23 °C. After the mixture was stirred for 30 min at the same temperature, the solution of resulting the epoxyalcohol (2.5 g, 19.2 mmol) in diethyl ether (165 mL) was added to the mixture. After stirred for 12 h at 0 °C, the reaction was quenched with saturated aqueous ammonium chloride. After the mixture was filtered through Celite, the phases were separated and the aqueous layer was extracted with diethyl ether. The combined organic extract was washed with water and brine, dried over Na2SO4, filtered, and evaporated. The residue was purified by column chromatography on silica gel (hexane:EtOAc = 2:1) to give diol 93 and its isomer (2.5 g, 89%, 93:isomer= 85:15) as a colorless oil. To a mixture of 93 and its isomer (2.5 g, 17 mmol) and *p*-anisaldehyde dimethylacetal (2.6 g, 14.3 mmol) in dichloromethane (40 mL) was added *p*-toluenesulfonic acid (50 mg, 0.26 mmol) at room temperature. After stirred for 12 h at the same temperature, the reaction was quenched with saturated NaHCO3, and the aqueous layer was extracted with dichloromethane. The extract was washed with water and brine, dried over Na2SO4, and evaporated. The residue was purified by column chromatography on silica gel (hexane:EtOAc = 15:1) to give the corresponding acetal (3.3 g, 87%) as a colorless oil. H 7.43-7.38 (2 H, m), 6.91-6.85 (2H, m), 5.42 (1 H, s), 4.05 (1 H, dd, *J* 4.6, 11 Hz), 3.78 (3 H, s), 3.51-3.38 (2 H, m), 2.11-1.96 (1 H, m), 1.70-1.56 (1 H, m), 1.56-1.37 (1 H, m), 0.97-0.90 (6 H, m), 0.74 (3 H, d, *J* 6.8 Hz); C 159.6, 131.7, 127.2, 113.3, 100.9, 84.9, 73.2, 55.2, 35.3, 30.6, 26.6, 12.9, 12.0.

# To the solution of the acetal (3.3 g, 12.5 mmol) in dichloromethane (25 mL) was added diisobutylaluminum hydride (33.7 mL, 31.3 mmol, 0.63 M solution in hexane,) at –78 °C. After stirred for 12 h at 0 °C, the reaction was quenched with methanol. After an aqueous Rochelle salt solution and diethyl ether were added, the mixture was warmed to room temperature and stirred vigorously until the resulting white slurry was completely dissolved. After the phases were separated, the aqueous layer was extracted with diethyl ether. The combined organic extract was washed with water and brine, dried over Na2SO4, and evaporated. The residue was purified by column chromatography on silica gel (hexane:EtOAc = 4:1 to 1:1) to give alcohol 94 (3.0 g, 91%) as a colorless oil. H 7.41 (2 H, d, *J* 8.6 Hz), 6.88 (2 H, d, *J* 8.8 Hz), 5.42 (1 H, s), 5.28 (1 H, s), 4.09 (1 H, dd, *J* 11.2, 4.6 Hz), 3.79 (3 H, s), 3.48 (1 H, dd, *J* 11.1, 11.1 Hz), 3.40 (1 H, dd, *J* 10.0, 2.2 Hz), 2.05 (1 H, m), 1.64 (1 H, dq, *J* 7.1, 2.0 Hz), 1.55-1.35 (2 H, m), 0.95 (3 H, d, *J* 6.8 Hz), 0.92 (3 H, t, *J* 7.6 Hz), 0.74 (3 H, d, *J* 6.8 Hz); C 159.2, 130.5, 129.4, 113.8, 88.2, 74.8, 66.7, 55.2, 38.1, 37.6, 15.5, 13.9, 12.1.

# Ethyl (2*E*,4*S*,5*R*,6*S*)-2,4,6-trimethyl-5-(4-methoxybenzyloxy)-2-octenoate 95

# To a solution of oxalyl chloride (2.9 g, 22.9 mmol) in dichloromethane (20 mL) was added a solution of dimethyl sulfoxide (2.7 g, 34.4 mmol) in dichloromethane (15 mL) at –78 °C. After stirring for 5 min at –78 °C, a solution of 94 (3.0 g, 11.5 mmol) in dichloromethane (60 mL) was added. After stirring for 1 h at –78 °C, a solution of triethylamine (7.0 g, 68.7 mmol) in dichloromethane (15 mL) was added, and the mixture was warmed to room temperature. After stirred for 1 h at room temperature, the reaction was quenched with water, and the aqueous layer was extracted with diethyl ether. The extract was washed with water and brine, dried over Na2SO4, and evaporated to give the corresponding aldehyde. To a solution of (carbethoxymethylidene)triphenylphosphorane (8.3 g, 22.9 mmol) in THF (10 mL) was added a solution of the aldehyde in THF (20 mL) at room temperature. After the solution was heated for 12 h at reflux, the solution was diluted with hexane. After the reaction mixture was filtered through Celite, the filtrate was evaporated. The residue was purified by column chromatography on silica gel (hexane:EtOAc = 20:1) to give corresponding ester 95 (3.5 g, 2 steps 82%) as a colorless oil. H 7.25 (2 H, d, *J* 8.6 Hz), 6.88-6.81 (3 H, m), 4.47 (2 H, s), 4.33 (2 H, q, *J* 7.1 Hz), 3.79 (3 H, s), 3.18 (1 H, dd, *J* 6.1, 4.6 Hz), 2.83-2.72 (1 H, m), 1.83 (3 H, s), 1.70-1.26 (6 H, m), 1.01 (3 H, d, *J* 7.2 Hz), 0.933 (3 H, d, *J* 7.0 Hz), 0.894 (3 H, t, *J* 7.7 Hz); C 168.4, 158.9, 145.2, 131.1, 129.1, 127.0, 113.6, 86.4, 74.4, 60.3, 55.2, 37.7, 36.5, 26.7, 17.3, 14.3, 14.0, 12.6, 11.9.

# Ethyl (2*E*,4*E*,6*S*,7*R*,8*S*)-2,4,6,8-tetramethyl-7-(4-methoxybenzyloxy)-2,4-decadienoate 96

# The corresponding alcohol was prepared in a similar manner (DIBAL reduction) as shown above (93%). H 7.25 (2 H, d, *J* 9.3 Hz), 6.87 (2 H, d, *J* 8.8 Hz), 5.343 (1 H, d, *J* 9.5 Hz), 4.48 (2 H, s), 4.00 (2 H, s), 3.79 (3 H, s), 3.09 (1 H, t, *J* 5.4 Hz), 2.76-2.68 (3 H, m), 1.66 (3 H, s), 1.60-1.24 (3 H, m), 0.98 (3 H, d, *J* 6.8 Hz), 0.94 (3 H, d, *J* 6.8 Hz), 0.89 (3 H, t, *J* 7.5 Hz); C 158.9, 134.0, 131.5, 129.5, 129.0, 113.5, 87.0, 74.5, 69.1, 55.2, 38.1, 37.8, 37.5, 35.2, 27.3, 21.0, 18.4, 14.2, 13.9, 11.8.

# The corresponding aldehyde was prepared in a similar manner (Swern oxidation) as shown above.

# Ester 96 was prepared in a similar manner (Wittig reaction) as shown above (81%, 2 steps). H 7.24 (2 H, d, *J* 8.4 Hz), 7.14 (1 H, s), 6.85 (2 H, d, *J* 8.4 Hz), 5.71 (1 H, d, *J* 9.9 Hz), 4.48 (2 H, s), 4.20 (2 H, q, *J* 7.1 Hz), 3.80 (3 H, s), 3.13 (1 H, t, *J* 5.3 Hz), 2.83-2.74 (1 H, m), 2.00 (3 H, s), 1.85 (3 H, s), 1.30 (3 H, t, *J* 7.2 Hz), 1.61-1.03 (3 H, m), 1.03 (3 H, d, *J* 6.6 Hz), 0.95 (3 H, d, *J* 6.6 Hz), 0.89 (3 H, t, *J* 7.4 Hz); C 169.3, 158.3, 143.3, 140.1, 131.45, 131.35, 129.0, 125.0, 113.6, 86.8, 74.5, 60.5, 55.2, 38.0, 35.9, 30.9, 26.7, 18.2, 16.4, 14.3, 14.0, 11.8.

# *S*-Ethyl (2*S*,3*S*,4*E*,6*E*,8*S*,9*R*,10*S*)-2,4,6,8,10-pentamethyl-3-hydroxy-9-(4-methoxybenzyloxy)-4,6-dodecadienethioate 97

# The corresponding alcohol was prepared in a similar manner (DIBAL reduction) as shown above. H 7.26 (2 H, d, *J* 8.3 Hz), 6.85 (2 H, d, *J* 8.8 Hz), 5.88 (1 H, s), 5.40 (1 H, d, *J* 9.7 Hz), 4.03 (2 H, s), 3.79 (3 H, s), 3.10 (1 H, t, *J* 5.3 Hz), 2.76-2.69 (1 H, m), 1.81 (3 H, s), 1.75 (3 H, s), 1.65-1.23 (3 H, m), 1.01 (3 H, d, *J* 6.8 Hz), 0.95 (3 H, d, *J* 6.6 Hz), 0.89 (3 H, t, *J* 7.3 Hz); C 158.5, 134.1, 133.9, 131.6, 131.3, 129.9, 129.0, 113.5, 87.1, 74.4, 69.7, 55.2, 37.9, 35.7, 26.7, 18.5, 17.0, 15.3, 14.3, 11.8.

# The corresponding aldehyde was prepared in a similar manner (TPAP oxidation) as shown above.

# To a mixture of tin(II) trifluoromethanesulfonate (1.28 g, 3.0 mmol) and (*S*)-1-methyl-2-[(*N*-1-naphthylamino)-methyl]pyrrolidine (240 mg, 3.6 mmol) in dichloromethane (9 mL) was added a solution of dibutyltin diacetate (351 mg, 3.3 mmol) in dichloromethane (3 mL) at room temperature. After the solution was cooled to –78 °C, a solution of [[(*Z*)-1-(ethylthio)-1-propenyl]oxy]trimethylsilane 79 (612 mg, 3.0 mmol) in dichloromethane (4 mL) was added followed by a solution of the aldehyde (624 mg, 1.8 mmol) in dichloromethane (4 mL). After stirred for 16 h at –78 °C, the reaction was quenched with saturated NaHCO3, and the aqueous layer was extracted with dichloromethane. The extract was washed with water and brine, dried over Na2SO4, and evaporated. The residue was purified by column chromatography on silica gel (hexane:EtOAc = 10:1 to 2:1) to give 97 (629 mg, 75%) as a colorless oil. H 7.24 (2 H, d, *J* 8.5 Hz), 6.85 (2 H, d, *J* 8.5 Hz), 5.94 (1 H, s), 5.37 (1 H, d, *J* 9.4 Hz), 4.50 (2 H, s), 3.79 (3 H, s), 3.09 (1 H, t, *J* 5.3 Hz), 2.95-2.65 (4 H, m), 1.75 (3 H, s), 1.72 (3 H, s), 1.70-1.19 (9 H, m), 1.00 (3 H, d, *J* 6.7 Hz), 0.94 (3 H, d, *J* 7.0 Hz), 0.88 (3 H, t, *J* 7.5 Hz); C 203.4, 158.8, 134.0, 132.7, 131.6, 128.9, 113.5, 87.1, 77.4, 74.4, 55.2, 51.4, 37.9, 35.8, 26.8, 23.2, 18.4, 17.1, 14.6, 14.4, 14.3, 11.9, 11.8.

# (2*E*,4*R*,5*S*,6*E*,8*E*,10*S*,11*R*,12*S*)-2,4,6,8,10,12-Hexamethyl-5-(triethylsiloxy)-11-(4-methoxybenzyloxy)-2,6,8-tetradecatrienal 98

# To a mixture of 97 (595 mg, 1.3 mmol) and 2,6-lutidine (691 mg, 6.2 mmol) in dichloromethane (4.5 mL) was added a solution of triethylsilyl trifluoromethanesulfonate (680 mg, 2.6 mmol) in dichloromethane (1.5 mL) at 0 °C. After stirred for 30 min at room temperature, the reaction was quenched with saturated NaHCO3, and the aqueous layer was extracted with dichloromethane. The extract was washed with water and brine, dried over Na2SO4, and evaporated. The residue was purified by column chromatography on silica gel (hexane:EtOAc = 10:1) to give the corresponding thioester as a colorless oil. H 7.24 (2 H, d, *J* 8.6 Hz), 6.85 (2 H, d, *J* 8.6 Hz), 5.77 (1 H, s), 5.33 (1 H, d, *J* 9.5 Hz), 4.49 (2 H, s), 4.15 (1 H, d, *J* 8.1Hz), 3.80 (3 H, s), 3.07 (1 H, t, *J* 5.3 Hz), 2.88-2.65 (4 H, m), 1.76 (3 H, s), 1.69 (3 H, s), 1.61-1.13 (9 H, m), 1.10-0.85 (18 H, m), 0.55 (6 H, q, *J* 8.2 Hz); C 201.9, 158.8, 134.4, 133.9, 131.7, 131.3, 128.9, 113.5, 86.9, 80.5, 74.2, 55.2, 53.5, 37.8, 35.8, 26.9, 23.0, 18.3, 16.9, 14.7, 14.1, 13.7, 13.0, 11.9, 6.9, 6.83, 6.78, 6.4, 4.8.

# The corresponding aldehyde was prepared in a similar manner (DIBAL reduction) as shown in the synthesis of intermediate 90. H 9.69 (1 H, s), 7.23 (2 H, d, *J* 8.5 Hz), 6.85 (2 H, d, *J* 8.6 Hz), 5.88 (1 H s), 5.34 (1 H, d, *J* 9.4 Hz), 4.50 (2 H, s), 4.39 (1 H, d, *J* 5.4 Hz), 3.79 (3 H, s), 3.16 (1 H, t, *J* 5.4 Hz), 2.78-2.61 (1 H, m), 2.56-2.51 (1 H, m), 1.722 (3 H, s), 1.715 (3 H, s), 1.63-0.47 (6 H, m), 1.61-1.53 (1 H, m), 1.50-1.40 (1 H, m), 1.27-1.18 (1 H, m), 1.08-0.84 (21 H, m); C 204.6, 158.9, 134.1, 131.7, 131.3, 131.2, 128.9, 113.5, 86.9, 78.1, 74.3, 55.2, 51.0, 37.8, 35.8, 26.9, 18.3, 17.1, 14.2, 14.1, 11.9, 7.0, 6.84, 6.80, 6.79, 6.4,

# The corresponding ester was prepared in a similar manner (Wittig reaction) as shown in the synthesis of intermediate 95. H 7.23 (2 H, d, *J* 8.5 Hz), 6.85 (2 H, d, *J* 8.9 Hz), 6.55 (1 H, d, *J* 10.0 Hz), 5.79 (1 H, s), 5.28 (1 H, d, *J* 9.8 Hz), 4.55-4.40 (2 H, m), 4.20-4.06 (2 H, m), 3.79 (3 H, s), 3.08 (1 H, t, *J* 4.9 Hz), 2.77-2.59 (2 H, m), 1.82 (3 H, s), 1.68 (3 H, s), 1.65 (3 H, s), 1.60-1.17 (6 H, m), 1.06-0.85 (21 H, m), 0.639-0.510 (6 H, m); C 168.2, 158.8, 144.8, 135.4, 133.4, 131.7, 131.3, 130.9, 128.9, 126.4, 113.5, 86.8, 82.0, 74.2, 60.3, 55.2, 38.2, 37.7, 35.8, 26.9, 18.2, 17.0, 15.8, 14.2, 14.1, 13.5, 12.4, 11.9, 6.9, 4.8.

# The correponding alcohol was prepared in a similar manner (DIBAL reduction) as shown in the synthesis of intermediate 96. H 7.24 (2 H, d, *J* 9.1 Hz), 6.85 (2 H, d, *J* 9.8 Hz), 5.76 (1 H, s), 5.25 (1 H, d, *J* 9.7 Hz), 5.11 (1 H, d, *J* 9.9 Hz), 4.48 (2 H s), 4.03-3.67 (5 H, m), 3.80 (1 H, t, *J* 5.3 Hz), 2.75-2.48 (2 H, m), 1.68 (3 H, s), 1.64 (3 H, s), 1.61 (3 H, s), 1.57-1.10 (3 H, m), 1.00-0.80 (21 H, m), 0.64-0.51 (6 H, m); C 158.9, 136.4, 133.5, 133.0, 131.6, 131.4, 130.5, 129.4, 129.1, 113.5, 87.1, 83.2, 74.3, 68.9, 55.6, 37.9, 37.2, 35.6, 26.7, 18.5, 17.3, 17.0, 14.4, 13.7, 13.1, 11.8, 6.9, 4.9.

# To a mixture of the alcohol, *N*-methyl morpholine *N*-oxide (226 mg, 1.9 mmol), and molecular sieves 4A (900 mg) in dichloromethane (5 mL) were added tetrapropylammonium perruthenate (45 mg, 0.13 mmol) at room temperature. After stirred for 1 h at the same temperature, the reaction mixture was filtered through Celite, and then the filtrate was washed with Na2SO3, water, and brine. The organic layer was dried over Na2SO4, and evaporated. The residue was purified by column chromatography on silica gel (hexane:EtOAc = 4:1) to give corresponding aldehyde 98 (362 mg, 5 steps 51%) as a colorless oil. H 9.30 (1 H, s), 7.22 (2 H, d, *J* 8.6 Hz), 6.85 (2 H, d, *J* 8.8 Hz), 6.25 (1 H, d, *J* 10.0 Hz), 5.79 (1 H, s), 5.28 (1 H, d *J* 9.2 Hz), 4.46 (2 H, s), 3.82-3.74 (4 H, m), 3.07 (1 H, t, *J* 4.8 Hz), 2.93-2.64 (2 H, m), 1.74 (3 H, s), 1.69 (3 H, s), 1.65 (3 H, s), 1.60-1.07 (6 H, m), 1.01-0.77 (18 H, m), 0.65-0.53 (6 H, m); C 195.4, 158.8, 157.2, 137.9, 135.2, 134.1, 131.7, 131.3, 131.1, 128.8, 113.5, 86.8, 82.1, 74.2, 55.2, 38.6, 37.7, 35.8, 26.8, 18.2, 17.0, 16.0, 14.1, 13.2, 11.9, 9.2, 6.9, 4.8.

# (1*R*,2*S*,3*R*)-1-[(4-Methoxybenzyloxy)methyl]-2,3-bis(4-methoxybenzyloxy)-4-hydroxybutyl (2*E*,4*R*,5*S*,6*E*,8*E*,10*S*,11*R*,12*S*)-2,4,6,8,10,12-hexamethyl-5-hydroxy-11-(4-methoxybenzyloxy)-2,6,8-tetradecatrienoate 99

# To a solution of 98 (362 mg, 0.65 mmol) in *tert*-butyl alcohol (13.4 mL) were added 2-methyl-2-butene (8.1 mL) and a mixture of sodium chlorite (1.30 g) and sodium dihydrogenphosphate dihydrate (1.30 g) in water (10.7 mL). After stirred for 20 h at room temperature, the reaction mixture was diluted with water and EtOAc. After the phases were separated, the aqueous layer was extracted with EtOAc. The combined organic extract was washed with water, an aqueous citric acid solution, and brine, dried over Na2SO4, and evaporated. The residue was purified by preparative thin layer chromatography on silica gel (hexan:EtOAc = 4:1) to give the corresponding carboxylic acid (329 mg, 89%) as a colorless oil. H 7.22 (2 H, d, *J* 8.7 Hz), 6.84 (2 H, d, *J* 8.8 Hz), 6.66 (1 H, d, *J* 9.5 Hz), 5.78 (1 H s), 5.27 (1 H, d, *J* 9.9 Hz), 4.48 (2 H, s), 3.81-3.78 (4 H, m), 3.07 (1 H, dd, *J* 4.6, 6.1 Hz), 2.76-2.64 (2 H, m), 1.82 (3 H, s), 1.67 (3 H, s), 1.64 (3 H, s), 1.54-0.84 (24 H, m), 0.64-0.51 (6 H, m); C 173.0, 158.8, 147.5, 135.4, 133.7, 131.8, 131.2, 128.8, 113.5, 86.8, 82.1, 74.1, 68.4, 55.2, 38.6, 37.7, 35.8, 26.9, 26.6, 24.4, 23.8, 20.2, 18.1, 17.0, 15.9, 14.1, 13.3, 12.1, 11.9, 6.9, 4.8.

# To a mixture of the carboxylic acid (329 mg, 0.58 mmol), *N, N*-dimethylaminopyridine (211 mg, 1.73 mmol), and dimethylaminopyridine hydrochloride (182 mg, 1.2 mmol) in dichloromethane (3 mL) was added a solution of dicyclohexyl carbodiimide (238 mg, 1.2 mmol) in dichloromethane (1 mL) followed by a solution of alcohol 5 (541 mg, 0.86 mmol). The solution was heated at reflux for 12 h. After cooling to room temperature, the solvent was evaporated and the residue was dissolved in EtOAc. The solution was washed with a 1 M aqueous HCl solution, water, and brine, dried over Na2SO4, and evaporated. The residue was filtered through preparative thin layer chromatography on silica gel (hexane:EtOAc = 2:1) to give the corresponding ester as a colorless oil. H 7.30-7.14 (8 H, m), 6.87-6.68 (8 H, m), 6.63 (1 H, d, *J* 9.8 Hz), 5.77 (1 H, s), 4.58-4.28 (8 H, m), 3.93-3.44 (19 H, m), 3.06 (1 H, t, *J* 5.3 Hz), 2.63-2.74 (2 H, m), 1.83 (3 H, s), 1.66 (3 H, s), 1.65 (3 H, s), 1.04-1.59 (3 H, m), 1.05 (3 H, d, *J* 6.6 Hz), 0.98-0.82 (18 H, m), 0.66-0.51 (3 H, m), 0.02 (3 H, s), 0.01 (3 H, s); C 167.3, 159.1, 159.05, 159.0, 158.7, 145.3, 135.2, 133.8, 131.6, 131.5, 131.0, 130.7, 130.4, 129.7, 129.0, 128.8, 126.6, 113.6, 113.5, 113.4, 86.7, 81.9, 79.6, 77.5, 73.4, 73.2, 72.6, 63.0, 55.1, 49.0, 38.4, 37.7, 35.6, 34.8, 33.9, 26.8, 25.8, 18.1, 17.0, 15.9, 14.1, 13.7, 12.6, 11.8, 6.9, 4.8, –5.45, –5.50.

# The diol 99 was prepared in a similar manner (1 N HCl/THF) as shown in the synthesis of derivative 30.

# (2*S*,3*S*,4*R*)-2,3,5-Trihydroxy-4-[[(2*E*,4*R*,6*E*,8*E*,10*S*,11*R*,12*S*)-1,5-dioxo-2,4,6,8,10,12-hexamethyl-11-hydroxy-2,6,8-tetradecatrienyl]oxy]pentanoic acid 31

# The correponding aldehyde was prepared in a similar manner (Dess–Martin oxidation) as shown in the synthesis of derivative 30.

# The correponding carboxylic acid was prepared in a similar manner (NaClO2 oxidation) as shown in the synthesis of derivative 30. H 7.50-6.45 (10 H, m), 5.75 (1 H, d, *J* 8.8 Hz), 5.20-5.10 (1 H, m), 4.70-4.12 (10 H, m), 4.03-3.91 (1 H, m), 3.88-3.43 (14 H, m), 3.21-3.08 (1 H, m), 2.89-2.72 (1 H, m), 1.91 (3 H, s), 1.82 (3 H, s), 1.76 (3 H, s), 1.61-0.87 (15 H, m); H 202.7, 174.0, 166.6, 159.2, 159.1, 159.0, 143.8, 142.7, 141.0, 133.4, 131.2, 130.9, 130.1, 129.13, 129.06, 128.89, 113.6, 86.9, 77.2, 74.5, 74.4, 74.2, 72.6, 72.5, 67.7, 55.2, 55.0, 39.8, 38.1, 36.1, 30.2, 26.6, 18.2, 16.7, 14.4, 13.4, 11.8.

# To a solution of the carboxylic acid (15.0 mg, 0.0156 mmol) in dichloromethane (1.5 mL) was added BCl3 (0.080 mL, 0.080 mmol, 1.0 M solution in heptane) at –78 °C. After stirred for 5 min at the same temperature, the reaction was quenched with saturated NaHCO3. After an aqueous citric acid solution and EtOAc were added, the mixture was warmed to room temperature and stirred for 30 min. After the phases were separated, the aqueous layer was extracted with EtOAc. The combined organic extract was washed with water and brine, dried over Na2SO4, and evaporated. The residue was purified by preparative thin layer chromatography on silica gel (chloroform:MeOH:water = 5:3:0.4) to give 31 (2.0 mg, 26%) as a colorless oil. H (400 MHz; CD3OD) 7.08 (1 H, s), 6.76 (1 H, m), 5.71 (1 H, m), 5.34 (1 H, m), 4.37 (1 H, m) 4.29 (1 H, m), 4.20 (2 H, m), 3.90-3.75 (2 H, m), 3.25 (1 H, m), 2.73 (1 H, m), 1.95 (3 H, s), 1.93 (3 H, s), 1.89 (3 H, s), 1.59 (1 H, m), 1.25 (2 H, m), 1.20 (3 H, d, *J* 6.6 Hz), 1.00 (3 H, m), 0.95 (3 H, d, *J* 7.4 Hz), 0.90 (3 H, m); HRMS (ESI) calcd. for C25H39O9 (M-H)- 483.2594, found 483.2589.

# Synthesis of derivative 22

# Allyl (2*E*,4*R*,5*S*,6*E*,8*E*,10*S*,11*R*,12*S*)-2,4,6,8,10,12-hexamethyl-5-hydroxy-11-(4-methoxybenzyloxy)-2,6,8-docosatrienoate 100

# To a mixture of carboxylic acid 62 (213 mg, 0.31 mmol) and cesium hydrogen carbonate (219 mg, 0.62 mmol) in DMF (2 mL) stiring at 0 °C for 30 min added a solution of allyl bromide (150 mg, 124 mmol) in DMF (2 mL) at 0 °C. After stirred for 120 min at room temperature, the reaction was quenched with water, and the aqueous layer was extracted with EtOAc. The extract was washed with water and brine, dried over Na2SO4, and evaporated. The residue was purified by preparative thin layer chromatography on silica gel (hexane:EtOAc = 4:1) to give the corresponding ester as a colorless oil. H 7.22 (2 H, d, *J* 8.4 Hz), 6.84 (2 H, d, *J* 8.1 Hz), 6.60 (1 H, d, *J* 8.5 Hz), 5.95-5.83 (1 H, m), 5.79 (1 H, s), 5.35-5.20 (3 H, m), 4.62-4.38 (4 H, m), 3.82 (1 H, d, *J* 7.4 Hz), 3.78 (3 H, s), 3.06 (1 H, t, *J* 5.2 Hz), 2.74-2.66 (2 H, m), 1.68 (3 H, s), 1.66 (3 H, s), 1.41-1.15 (19 H, m), 1.05-0.86 (21 H, m), 0.59 (6 H, q, *J* 7.9 Hz); C 167.7, 158.8, 145.2, 135.4, 133.5, 132.5, 131.6, 131.3, 130.9, 128.8, 126.1, 117.6, 117.4, 113.5, 113.4, 87.0, 82.1, 74.2, 64.9, 55.1, 38.3, 35.9, 35.8, 34.2, 31.9, 29.9, 29.64, 29.61, 29.3, 27.4, 22.6, 18.2, 17.0, 15.8, 14.5, 14.0, 13.3, 12.4, 11.3, 6.9, 6.8, 4.8

# To a solution of the ester in ethanol (5.7 mL) was added a 1 M aqueous HCl solution (2.8 mL) at room temperature. After stirred for 12 h at the same temperature, the reaction was quenched with saturated NaHCO3, and the aqueous layer was extracted with EtOAc. The extract was washed with water and brine, dried over Na2SO4, and evaporated. The residue was purified by preparative thin layer chromatography on silica gel (hexane:EtOAc = 4:1) to give corresponding hydroxyester 100 (142 mg, 2 steps 72%) as a colorless oil. H 7.22 (2 H, d, *J* 8.2 Hz), 6.84 (2 H, d, *J* 7.9 Hz), 6.63 (1 H, d, *J* 10.3 Hz), 5.96-5.87 (1 H, m), 5.85 (1 H, s), 5.40-5.14 (2 H, m), 4.46-4.41 (4 H, m), 3.87 (1 H, d, *J* 7.4 Hz), 3.78 (1 H, s), 3.06 (1 H, t, *J* 5.2 Hz), 2.77-2.68 (2 H, m), 1.85 (3 H, s), 1.70-1.52 (6 H, m), 1.43-1.15 (21 H, m), 1.08 (3 H, d, *J* 6.4 Hz), 1.08-0.86 (9 H, m); C 167.7, 158.8, 144.5, 135.0, 134.0, 132.4, 131.6, 131.4, 131.1, 129.0, 126.5, 117.5, 113.5, 87.1, 81.4, 74.4, 65.0, 55.1, 37.3, 36.1, 35.7, 34.1, 31.9, 30.0, 29.63, 29.59, 29.3, 27.2, 22.6, 18.3, 17.0, 15.6, 14.1, 13.5, 12.4, 6.5, 5.7.

# (2*E*,4*R*,6*E*,8*E*,10*S*,11*R*,12*S*) -2,4,6,8,10,12-Hexamethyl-5-oxo-11-hydroxy-2,6,8-docosatrienoic acid 22

# The corresponding ketoester was prepared in a similar manner (Dess–Martin oxidation) as shown in the synthesis of derivative 31 (70%). H 7.21 (2 H, d, *J* 8.5 Hz), 6.97-6.78 (3 H, m), 5.97-5.86 (1 H, m), 5.76 (1 H, d, *J* 9.7 Hz), 5.32-5.16 (2 H, m), 4.62-4.39 (4 H, m), 4.25-4.09 (1 H, m), 3.12 (1 H, s), 2.85-2.78 (1 H, m), 2.01-1.90 (6 H, m), 1.86 (3 H, s), 1.45-1.15 (24 H, m), 1.04 (3 H, d, *J* 6.6 Hz), 0.95 (3 H, d, *J* 6.8 Hz), 0.88 (3 H, t, *J* 6.8 Hz); C 202.5, 167.4, 159.0, 144.0, 142.4, 141.2, 133.5, 132.3, 131.5, 131.2, 129.0, 127.4, 117.9, 113.6, 87.1, 74.6, 65.3, 55.2, 40.2, 36.3, 36.1, 34.0, 31.9, 29.9, 29.63, 29.61, 29.3, 27.2, 22.6, 18.2, 17.6, 16.6, 14.8, 14.1, 3.3, 2.7.

# To a solution of the ketoester (48.8 mg, 0.080 mmol) in dichloromethane (2 mL) was added water (0.1 mL) followed by 2,3-dichloro-5,6-dicyano-*p*-benzoquinone (36.9 mg, 0.16 mmol) at 0 °C. After stirring for 30 min at the same temperature, NaHCO3 was added. After the phases were separated, the aqueous layer was extracted with dichloromethane. The combined organic extract was washed with water and brine, dried over Na2SO4, and evaporated. The residue was purified by preparative thin layer chromatography on silica gel (benzene:EtOH = 10:1) to give the corresponding ketoester (28 mg, 71%). H 6.92 (1 H, s), 6.82 (1 H, d, *J* 10.1 Hz), 5.99-5.88 (1 H, m), 5.58 (1 H, d, *J* 9.8 Hz), 5.33 (1 H, dd, *J* 17.4, 1.5 Hz), 5.23 (1 H, dd, *J* 10.4, 1.5 Hz), 4.68-4.58 (2 H, m), 4.23-4.16 (1 H, m), 3.31 (1 H, dd, *J* 7.6, 4.0 Hz), 2.73-2.66 (1 H, m), 1.95 (3 H, s), 1.95 (3 H, s), 1.89 (3 H, s), 1.63-1.59 (1 H, m), 1.33-1.20 (20 H, m), 1.24 (3 H, d, *J* 7.1 Hz), 0.99 (3 H, d, *J* 6.7 Hz), 0.91 (3 H, d, *J* 6.7 Hz), 0.87 (3 H, t, *J* 6.9 Hz); C 202.5, 167.4, 143.2, 140.2, 140.0, 134.0, 133.0, 132.3, 127.6, 118.0, 77.3, 65.4, 40.3, 36.6, 35.0, 34.1, 31.9, 29.9, 29.64, 29.62, 29.3, 27.2, 22.7, 17.6, 17.1, 16.9, 14.1, 13.5, 13.0, 12.7.

# To a mixture of the ketoester (14 mg, 0.029 mmol) and palladium tetrakistriphenylphoshine (6.6 mg, 0.0087 mmol) in THF (1 mL) was added a solution of morpholine (50 mg, 0.56 mmol) in THF (0.2 mL) at 0 °C. After stirred for 12 h at room temperature, the reaction was quenched with an aqueous citric acid solution, and the aqueous layer was extracted with EtOAc. The extract was washed with water and brine, dried over Na2SO4, filtered, and evaporated. The residue was purified by preparative thin layer chromatography on silica gel (hexane:EtOAc = 1:1) to give 22 (6.5 mg, 51%) as a colorless oil. H (500 MHz; CDCl­­3) 6.92 (1 H, s), 6.91 (1 H, d, 10.1 Hz), 5.58 (1 H, d, *J* 9.8 Hz), 4.20 (1 H, m), 3.31 (1 H, dd, *J* 7.5, 4.1 Hz), 2.70 (1 H, m), 1.97 (3 H, d, *J* 0.9 Hz), 1.94 (3 H, d, *J* 7.0 Hz), 1.90 (3 H, d, *J* 0.9 Hz), 1.65-1.55 (1 H, m), 1.25 (3 H, d, *J* 6.7 Hz), 1.35-1.20 (18 H, m), 0.99 (3 H, d, *J* 6.8 Hz), 0.91 (3 H, d, *J* 6.7 Hz), 0.88 (3 H, t, *J* 7.0 Hz); C 202.2, 170.4, 144.3, 143.3, 140.0, 134.2, 133.0, 126.6, 78.4, 40.5, 36.7, 35.0, 34.1, 31.9, 29.9, 29.7, 29.6, 29.3, 27.2, 22.7, 17.6, 17.1, 16.9, 14.1, 13.5, 13.0, 12.4; HRMS (ESI) calcd. for C28H49O4 (M-H)- 447.3475, found 447.3482.

# Synthesis of derivative 32

# Ethyl (2*E*,4*R*,6*E*,8*E*,10*S*,11*R*,12*S*)-2,4,6,8,10,12-hexamethyl-5-oxo-11-hydroxy-2,6,8-docosatrienoate 32

# To a solution of the ester (450 mg, 0.525 mmol) in THF (18.4 mL) was added 1 M aqueous HCl solution (5.2 mL) at room temperature. After stirred at this temperature for 1 day, the reaction mixture was quenched with saturated NaHCO3 and extracted with EtOAc. The combined organic layer was washed with brine, dried over Na2SO4, and evaporated. The resulting residue was purified by silica gel column chromatography (hexane:EtOAc = 3:1) to give the corresponding alcohol (250 mg, 80%) as a colorless oil. []D25.7 –21.1 (*c* 0.785 in CHCl3); max(film)/cm–1 3463, 2924, 2853, 1708, 1514, 1462, 1248; H (400 MHz, CDCl3) 7.24 (2 H, d, *J* 8.7 Hz), 6.85 (2 H, d, *J* 8.7 Hz), 6.68 (1 H, dq, *J* 9.8, 1.0 Hz), 5.87 (1 H, s), 5.40 (1 H, d, *J* 9.8 Hz), 4.51 (1 H, d, *J* 10.8 Hz), 4.47 (1 H, d, *J* 10.8 Hz), 4.18 (2 H, q, *J* 7.1 Hz), 3.81 (1 H, d, *J* 8.5 Hz), 3.79 (3 H, s), 3.08 (1 H, t, *J* 5.4 Hz), 2.75 (1 H, m), 1.90 (3 H, d, *J* 1.5 Hz), 1.78 (3 H, d, *J* 1.0 Hz), 1.75 (3 H, d, *J* 1.0 Hz), 1.68 (1 H, br s), 1.43-1.15 (19 H, m), 1.29 (3 H, t, *J* 7.1 Hz), 1.01 (3 H, d, *J* 6.8 Hz), 0.95 (3 H, d, *J* 6.6 Hz), 0.89 (3 H, d, *J* 6.8 Hz), 0.88 (3 H, t, *J* 6.8 Hz); C (100 MHz, CDCl3) 168.0, 158.8, 144.5, 134.3, 134.0, 132.9, 131.5, 131.1, 129.0, 128.9, 113.5, 87.2, 82.9, 74.4, 55.2, 37.2, 36.1, 35.7, 34.0, 31.9, 29.9, 29.6, 29.6, 29.6, 29.6, 29.3, 27.3, 22.6, 18.4, 17.0, 16.6, 14.8, 14.1, 14.2, 12.7, 12.6.

# To a solution of the alcohol (53.7 mg, 0.0897 mmol) and pyridine (0.015 mL, 0.19 mmol) in dichloromethane (2.0 mL) was added Dess–Martin periodinane (53.3 mg, 0.126 mmol) at 0 ˚C. After stirred at room temperature for 1 h, the reaction mixture was diluted with EtOAc. The organic layer was washed with saturated NaHCO3, 10% NaHSO3, and brine, dried over Na2SO4, and evaporated. The resulting residue was purified by silica gel column chromatography (hexane:EtOAc = 4:1) to give the corresponding ketone (31.8 mg, 60%) as a colorless oil. []D25.5 –4.85 (*c* 1.15 in CHCl3); max(film)/cm–1 2924, 2855, 1712, 1668, 1614, 1515, 1458, 1250, 1035; H (400 MHz, CDCl3) 7.22 (2 H, d, *J* 8.7 Hz), 6.94 (1 H, s), 6.84 (2 H, d, *J* 8.7 Hz), 6.77 (1 H, dq, *J* 9.8, 1.4 Hz), 5.75 (1 H, d, *J* 9.8 Hz), 4.49 (1 H, d, *J* 10.8 Hz), 4.45 (1 H, d, *J* 10.8 Hz), 4.25-4.10 (3 H, m), 3.79 (3 H, s), 3.12 (1 H, dd, *J* 5.4, 5.1 Hz), 2.81 (1 H, m), 1.94 (3 H, d, *J* 1.0 Hz), 1.93 (3 H, d, *J* 1.4 Hz), 1.83 (3 H, d, *J* 1.0 Hz), 1.44-1.14 (19 H, m), 1.27 (3 H, t, *J* 7.2 Hz), 1.23 (3 H, d, *J* 6.6 Hz), 1.04 (3 H, d, *J* 6.8 Hz), 0.95 (3 H, d, *J* 6.6 Hz), 0.88 (3 H, t, *J* 6.8 Hz); C (100 MHz, CDCl3) 202.7, 167.8, 159.0, 144.0, 141.9, 141.2, 133.5, 131.6, 131.2, 129.0, 127.7, 113.6, 87.1, 74.6, 60.3, 55.2, 40.2, 36.3, 36.2, 34.0, 31.9, 29.9, 29.7, 29.6, 29.6, 29.3, 27.3, 22.7, 18.2, 17.7, 16.7, 14.8, 14.2, 14.1, 13.4, 12.7. *m/z* (ESI) 619 (M+Na)+.

# To a solution of the ketone (31.0 mg, 0.0520 mmol) in dichloromethane (1.8 mL) was added trifluoroacetic acid (0.2 mL) at 0 ˚C. After stirred at this temperature for 30 min, the reaction mixture was quenched with saturated NaHCO3 and extracted with EtOAc. The combined organic layer was washed with brine, dried over Na2SO4, and evaporated. The resulting residue was purified by preparative thin layer chromatography on silica gel (hexane:EtOAc = 6:1) to give the derivative (32) (18.3 mg, 74%) as a colorless oil. []D25.3 –19.1 (*c* 0.915 in CHCl3); max(film)/cm–1 3524, 2925, 2854, 1713, 1666, 1246, 1033; H (300 MHz, CD3OD) 7.09 (1 H, s), 6.68 (1 H, dd, *J* 9.9, 1.5 Hz), 5.75 (1 H, d, *J* 9.7 Hz), 4.37 (1 H, m), 4.16 (2 H, q, *J* 7.1 Hz), 3.25 (1 H, t, *J* 5.7 Hz), 2.76 (1 H, m), 1.94 (3 H, d, *J* 1.3 Hz), 1.92 (3 H, d, *J* 1.5 Hz), 1.90 (3 H, d, *J* 1.1 Hz), 1.51 (1 H, m), 1.35-1.22 (18 H, m), 1.27 (3 H, t, *J* 7.1 Hz), 1.18 (3 H, d, *J* 6.8 Hz), 1.01 (3 H, d, *J* 7.0 Hz), 0.91 (3 H, t, *J* 7.0 Hz); C (75 MHz, CD3OD) 204.6, 169.2, 145.8, 143.2, 141.6, 134.6, 133.1, 129.2, 79.7, 61.8, 41.2, 37.4, 37.3, 34.5, 33.1, 30.9, 30.8, 30.7, 30.5, 28.0, 23.7, 18.1, 18.1, 16.8, 14.9, 14.5, 14.5, 13.7, 12.9; HRMS (ESI) calcd. for C30H51O4 (M-H)- 475.3788, found 475.3784.

#

Synthesis of derivative 33

(1*R*,2*S*,3*R*)-1-(Hydroxymethyl)-2,3,4-trihydroxybutyl (2*E*,4*R*,6*E*,8*E*,10*S*,11*R*,12*S*)-2,4,6,8,10,12-hexamethyl-5-oxo-11-(4-methoxybenzyloxy)-2,6,8-docosatrienoate 33

To a mixture of diol **101** (44.1 mg, 0.041 mmol) and 2,6-lutidine (11.1 mg, 0.10 mmol) in dichloromethane (1.5 mL) was added a solution of *tert*-butyldimethylsilyl trifluoromethanesulfonate (13.3 mg, 0.045 mmol) in dichloromethane (0.5 mL) at 0 °C. After stirred for 60 min at the same temperature, the reaction was quenched with an aqueous sodium hydrogen carbonate solution, and the aqueous layer was extracted with dichloromethane. The extract was washed with water and brine, dried over Na2SO4, and evaporated. The residue was purified by preparative thin layer chromatography on silica gel (hexane:EtOAc = 2:1) to give the corresponding alcohol (28 mg, 63%) as a colorless oil. H 7.27-7.12 (8 H, m), 6.90-6.79 (8 H, m), 6.70 (1 H, d, *J* 10.3 Hz), 5.89 (1 H, s), 5.32 (1 H, d, *J* 10.3 Hz), 5.30-5.20 (1 H, m), 4.57-4.31 (8 H m), 3.95-3.52 (19 H, m), 3.05 (1 H, t, *J* 5.3 Hz), 2.81-2.60 (2 H, m), 1.84 (3 H, s), 1.70 (3 H, s), 1.67 (3 H, s), 1.57-1.15 (19 H, m), 1.06 (3 H, d, *J* 6.7 Hz), 0.96-0.85 (18 H, m), 0.02 (3 H, s), –0.02 (3 H, s); C 167.2, 159.1, 159.0, 144.9, 134.8, 134.3, 131.6, 131.4, 131.1, 130.7, 130.5, 130.4, 129.81, 129.78, 129.1, 129.0, 127.0, 113.7, 113.6, 113.5, 87.3, 85.6, 80.6, 79.5, 76.6, 74.4, 74.1, 73.3, 72.6, 62.9, 55.2, 37.1, 36.1, 35.7, 34.2, 31.9, 30.0, 29.7, 29.6, 29.3, 27.3, 25.9, 22.7, 18.4, 18.2, 17.1, 14.9, 14.8, 14.3, 14.1, 12.6, –5.36, ­–5.44.

To a mixture of Dess-Martin periodinane (24.2 mg, 0.057 mmol) and pyridine (5.6 mg, 0.071 mmol) in dichloromethane (0.5 mL) was added a solution of the alcohol (347 mg, 0.32 mmol) in dichloromethane (1 mL) at room temperature. After stirred for 2 h at the same temperature, the reaction mixture was diluted with NaHCO3 and EtOAc. After the phases were separated, the aqueous layer was extracted with EtOAc. The combined organic extract was washed with a 1 M Na2S2O3, water, and brine, dried over Na2SO4, and evaporated. The residue was purified by preparative thin layer chromatography on silica gel (hexane:EtOAc = 2:1) to give the corresponding ketoesteras a colorless oil, which was used without further purification.

To a solution of the ketoesterin THF (1 mL) was added a 1 M aqueous HCl solution (0.25 mL) at room temperature. After stirred for 12 h at the same temperature, the reaction was quenched with NaHCO3, and the aqueous layer was extracted with EtOAc. The extract was washed with water and brine, dried over Na2SO4, and evaporated. The residue was purified by preparative thin layer chromatography on silica gel (hexane:EtOAc = 1:2) to give the corresponding hyrdoxyester (18 mg, 2 steps 58%) as a colorless oil. H 7.25-7.16 (8 H, m), 6.94 (1 H, s), 6.86-6.80 (8 H, m), 5.74 (1 H, d, *J* 9.9 Hz), 5.24 (1 H, s), 4.60-4.30 (8 H, m), 4.22 (1 H, q, *J* 6.9 Hz), 3.89-3.50 (19 H, m), 3.11 (1 H, t, *J* 5.2 Hz), 2.85-2.48 (1 H, m), 1.92 (3 H, s), 1.91 (3 H, s), 1.83 (3 H, s), 1.75-1.10 (19 H, m), 1.03 (3 H, d, *J* 6.8 Hz), 0.95 (3 H, d, *J* 6.8 Hz), 0.89 (3 H, t, *J* 6.6 Hz); C 166.9, 163.3, 159.3, 159.2, 159.0, 143.8, 142.9, 140.8, 133.5, 131.4, 131.2, 130.3, 130.1, 130.0, 129.9, 129.7, 129.3, 129.0, 124.2, 113.7, 113.6, 87.1, 78.9, 78.2, 74.6, 73.9, 73.4, 72.8, 61.9, 55.2, 40.0, 39.2, 36.4, 36.2, 34.0, 31.9, 30.0, 29.6, 29.3, 27.2, 22.7, 18.3, 18.1, 16.7, 14.9, 14.1, 13.4, 12.7, 5.5.

To a solution of the ketoester(18 mg, 0.017 mmol) in dichloromethane (1 mL) was added BCl3 (0.083 ml, 0.083 mmol, 1.0 M solution in heptane) at –78 °C. After stirred for 10 min at the same temperature, the reaction was quenched with NaHCO3. After the phases were separated, the aqueous layer was extracted with EtOAc. The combined organic extract was washed with water and brine, dried over Na2SO4, filtered, and evaporated. The residue was purified by preparative thin layer chromatography on silica gel (chloroform:MeOH = 6:1) to give **33** (4.5 mg, 46%) as a colorless oil. H (500 MHz; CDCl­­3) 6.93 (1 H, d, *J* 8.6 Hz), 6.86 (1 H, d, *J* 9.4 Hz), 5.59 (1 H, d, *J* 9.1 Hz), 4.93 (1 H, m), 4.15 (1 H, dd, *J* 7.0, 9.8 Hz), 4.00-3.70 (5 H, m), 3.32 (1 H, dd, *J* 4.0, 7.3 Hz), 2.69 (1 H, m), 1.96 (3 H, s), 1.94 (3 H, s), 1.92 (3 H, s), 1.60 (1 H, m), 1.25 (3 H, d, *J* 6.7 Hz), 1.35-1.20 (18 H, m), 0.99 (3 H, d, *J* 6.7 Hz), 0.90 (3 H, d, *J* 6.7 Hz), 0.88 (3 H, t, *J* 6.9 Hz); HRMS (ESI) calcd. for C33H57O8 (M-H)- 581.4054, found 581.4077.

# Synthesis of derivatives 34-36

# (4*S*) -5-(4-Methoxybenzyloxy) -1,4-pentanediol 103

# To a solution of the PMB ether (102) (610 mg, 2.58 mmol) in THF (12 mL) was added lithium aluminum hydride (147 mg, 3.87 mmol) at 0 ˚C carefully. After stirred at this temperature for 30 min, the reaction mixture was quenched with aqueous Rochelle salt and diethyl ether was added. The mixture was warmed to room temperature and stirred vigorously for 4 h. The organic layer was separated, and the aqueous layer was extracted with EtOAc. The combined organic layer was washed with brine, dried over Na2SO4, and evaporated. The resulting residue was purified by silica gel column chromatography (hexane:acetone = 3:2) to give the corresponding diol (103) (601 mg, 97%) as a colorless oil. H (400 MHz, CDCl3) 7.25 (2 H, d, *J* 8.3 Hz), 6.88 (2 H, d, *J* 8.3 Hz), 4.47 (2 H, s), 3.86-3.74 (1 H, m), 3.80 (3 H, s), 3.70-3.53 (2 H, m), 3.45 (1 H, m), 3.32 (1 H, m), 3.10-2.80 (1 H, m), 1.73-1.38 (4 H, m);C (100 MHz, CDCl3) 159.3, 129.9, 129.4, 113.8, 74.1, 73.0, 70.3, 62.7, 55.2, 30.1, 29.0; *m/z* (ESI) 263 (M+Na)+.

# (2*S*) -1-(4-Methoxybenzyloxy)-5-(*tert*-butyldimethylsiloxy)-2-pentanol 104

# (2*R*,3*S*)-1,3-Bis(4-methoxybenzyloxy)-5-(*tert*-butyldimethylsiloxy)-2-pentanol 107

# (2*R*,3*R*,4*S*)-1,3,4-Tris(4-methoxybenzyloxy)-5-(*tert*-butyldimethylsiloxy)-2-pentanol 110

# To a mixture of diol 103 (560 mg, 2.33 mmol) and imidazole (174 mg, 2.56 mmol) in DMF (10 mL) was added *tert*-butyldimethylsilyl chloride (387 mg, 2.57 mmol) at 0 ˚C. After stirred at room temperature for 2 h, the reaction mixture was quenched with saturated NaHCO3 and extracted with EtOAc. The combined organic layer was washed with brine, dried over Na2SO4, and evaporated. The resulting residue was purified by silica gel column chromatography (hexane:EtOAc = 10:1 to 5:1) to give the corresponding monoTBS ether (104) (577 mg, 70%) as a colorless oil.H (300 MHz, CDCl3) 7.25 (2 H, d, *J* 8.8 Hz), 7.19 (2 H, d, *J* 8.8 Hz), 6.87 (2 H, d, *J* 8.8 Hz), 6.85 (2 H, d, *J* 8.8 Hz), 4.51-4.41 (4 H, m), 3.87 (1 H, m), 3.79 (3 H, s), 3.79 (3 H, s), 3.77-3.63 (2 H, m), 3.60-3.50 (2 H, m), 2.90 (1 H, m), 1.86-1.73 (2 H, m), 0.90 (9 H, s), 0.06 (6 H, s);C (100 MHz, CDCl3) 159.2, 130.1, 129.3, 113.8, 74.2, 72.9, 70.2, 63.2, 55.2, 30.2, 28.9, 25.9, 18.3, –5.4, –5.4; *m/z* (ESI) 355 (M+H)+.

# The monoTBS ether (107) and (110) were prepared in a similar way as above; (107, 90% and 110, 77% respectively).

# (107 ): H (300 MHz, CDCl3) 7.26 (2 H, d, *J* 8.6 Hz), 6.88 (2 H, d, *J* 8.6 Hz), 4.48 (2 H, s), 3.84-3.74 (1 H, m), 3.80 (3 H, s), 3.64 (2 H, d, *J* 5.9 Hz), 3.45 (1 H, dd, *J* 9.5, 3.7 Hz), 3.33 (1 H, dd, *J* 9.5, 7.5 Hz), 2.90 (1 H, br s), 1.72-1.39 (4 H, m), 0.89 (9 H, s), 0.05 (6 H, s);C (100 MHz, CDCl3) 159.2, 159.2, 130.6, 130.2, 129.4, 129.4, 113.7, 113.7, 76.5, 73.0, 72.0, 71.9, 70.7, 59.3, 55.2, 55.2, 33.2, 25.9, 18.2, ­–5.4, –5.4; *m/z* (ESI) 513 (M+Na)+.

# 110H (300 MHz, CDCl3) 7.25 (2 H, d, *J* 8.6 Hz), 7.24 (2 H, d, *J* 8.8 Hz), 7.17 (2 H, d, *J* 8.6 Hz), 6.86 (2 H, d, *J* 8.8 Hz), 6.86 (2 H, d, *J* 8.6 Hz), 6.83 (2 H, d, *J* 8.6 Hz), 4.65 (1 H, d, *J* 11.2 Hz), 4.58 (1 H, d, *J* 11.0 Hz), 4.52 (1 H, d, *J* 11.2 Hz), 4.47 (1 H, d, *J* 11.0 Hz), 4.46 (1 H, d, *J* 11.7 Hz), 4.42 (1 H, d, *J* 11.6 Hz), 3.93 (1 H, m), 3.79 (3 H, s), 3.78 (3 H, m), 3.57-3.53 (3 H, m), 0.90 (9 H, s), 0.05 (3 H, s), 0.04 (3 H, s); c (100 MHz, CDCl3) 159.20, 159.16, 159.1, 130.62, 130.57, 130.3, 129.6, 129.5, 129.4, 113.8, 113.72, 113.68, 80.4, 78.4, 73.2, 73.0, 72.3, 71.2, 71.1, 70.9, 62.6, 55.2, 25.9, 18.3, –5.4, –5.4; *m/z* (ESI) 649 (M+Na)+.

# (3*S*,4*R*)-3,5-Bis(4-methoxybenzyloxy)-1,4-pentanediol 106

# (2*S*,3*R*,4*R*)-2,3,5-Tris(4-methoxybenzyloxy)-1,4-pentanediol 109

# To a solution of 2-deoxy-D-ribose (105) (2.0 g, 14.9 mmol) in allyl alcohol (30 mL) was added conc. sulfuric acid (0.2 mL) at 0 ˚C. After storage for 12 h at 0 ˚C, the reaction mixture was added excess NaHCO3 carefully and filtered through Celite, washed with THF. The filtrate was evaporated to give the allyl ether as pale yellow oil, which was used without further purification. To a mixture of the allyl ether and *p*-methoxybenzyl chloride (6.06 mL, 44.7 mmol) in THF (40 mL) was added 50% aqueous potassium hydroxide solution (40 mL) and tetrabutylammonium bromide (240 mg, 0.744 mmol). The reaction mixture was stirred at 90 ˚C for 5 h. After cooling to room temperature, water was added and extracted with EtOAc. The combined organic layer was washed with brine, dried over Na2SO4, and evaporated. The resulting residue was filtered by silica gel column chromatography (hexane:acetone = 4:1) to give the corresponding diPMB ether, which was used without further purification. To a mixture of diPMB ether and [1,3-bis(diphenylphosphino)-propane]dichloronickel(II) (12 mg, 0.022 mmol) in diethyl ether (15 mL) was added diisobutylaluminum hydride (6.60 mL, 6.14 mmol, 0.93 M in hexane) at 0 ˚C. After stirred at 0 ˚C for 2 h, the reaction mixture was quenched with MeOH and then aqueous Rochelle salt and EtOAc was added. The mixture was warmed to room temperature and stirred vigorously for 5 h. The organic layer was separated, and the aqueous layer was extracted with EtOAc. The combined organic layer was washed with brine, dried over Na2SO4, and evaporated. The resulting residue was purified by silica gel column chromatography (hexane:acetone = 3:2) to give the diol (106) (761 mg, 3 steps 20%) as a colorless oil. H (300 MHz, CDCl3) 7.24 (2 H, d, J 8.6 Hz), 7.19 (2 H, d, *J* 8.6 Hz), 6.87 (2 H, d, *J* 8.6 Hz), 6.85 (2 H, d, *J* 8.6 Hz), 4.52-4.43 (4 H, m), 3.90 (1 H, m), 3.79 (3 H, s), 3.78 (3 H, s), 3.78-3.67 (2 H, m), 3.63 (1 H, m), 3.60-3.57 (2 H, m), 2.85 (2 H, br s), 1.92-1.75 (2 H, m); C (100 MHz, CDCl3) 159.3, 159.3, 130.0, 129.8, 129.6, 129.5, 113.8, 113.8, 77.6, 73.1, 71.7, 71.5, 70.6, 59.6, 55.2, 55.2, 32.4; *m/z* (ESI) 399 (M+Na)+.

# The diol (109) was prepared in a similar manner as above diol (106) (3 steps 47%).

# H (400 MHz, CDCl3) 7.24 (2 H, d, *J* 8.6 Hz), 7.22 (2 H, d, *J* 8.8 Hz), 7.16 (2 H, d, *J* 8.8 Hz), 6.86 (2 H, d, *J* 8.8 Hz), 6.85 (2 H, d, *J* 8.8 Hz), 6.82 (2 H, d, *J* 8.6 Hz), 4.64 (1 H, d, *J* 10.8 Hz), 4.58-4.40 (5 H, m), 3.95 (1 H, m), 3.80 (3 H, s), 3.80 (3 H, s), 3.80 (3 H, s), 3.77-3.68 (3 H, m), 3.57-3.53 (3 H, m);c (100 MHz, CDCl3) 159.2, 130.2, 130.1, 130.0, 129.7, 129.6, 129.5, 113.9, 113.83, 113.80, 79.1, 78.7, 73.6, 73.0, 71.5, 70.75, 70.67, 61.0, 55.2.

# (4*S*)-4-[[(2*E*,4*R*,6*E*,8*E*,10*S*,11*R*,12*S*)-1,5-Dioxo-2,4,6,8,10,12-hexamethyl-11-

# hydroxy-2,6,8-docosatrienyl]oxy]-5-hydroxypentanoic acid 34

# (3*S*,4*R*)-3,5-Dihydroxy-4-[[(2*E*,4*R*,6*E*,8*E*,10*S*,11*R*,12*S*)-1,5-dioxo-2,4,6,8,10,12-

# hexamethyl-11-hydroxy-2,6,8-docosatrienyl]oxy]pentanoic acid 35

# (2*R*,3*S*,4*R*)-2,3,5-Trihydroxy-4-[[(2*E*,4*R*,6*E*,8*E*,10*S*,11*R*,12*S*)-1,5-dioxo-2,4,6,8,10,12-hexamethyl-11-hydroxy-2,6,8-docosatrienyl]oxy]pentanoic acid 36

# To a solution of the acid (67) (201 mg, 0.247 mmol) and the alcohol (104) (131 mg, 0.370 mmol) in dichloromethane (2.5 mL) was added *N,N*-dimethylaminopyridine (150 mg, 1.23 mmol), 1-(3-dimethylaminopropyl)-3-ethylcarbodiimide hydrochloride (94.7 mg, 0.494 mmol). The reaction mixture was heated at reflux for 4 h. After cooled to room temperature, the reaction mixture was diluted with EtOAc. The organic layer was washed with 0.5 M KHSO4, saturated NaHCO3 and brine, dried over Na2SO4, and evaporated. The resulting residue was filtered through a short column chromatography (hexane:EtOAc = 10:1) to give the corresponding adduct, which was used without further purification. To a solution of the adduct in THF (7.0 mL) was added a 1 M aqueous HCl solution (2.0 mL) at room temperature. After stirred at this temperature for 36 h, the reaction mixture was quenched with saturated NaHCO3, and extracted with EtOAc. The combined organic layer was washed with brine, dried over Na2SO4, and evaporated. The resulting residue was purified by silica gel column chromatography (hexane:EtOAc = 2:1) to give the diol (94.1 mg, 2 steps 54%) as a colorless oil. H (400 MHz, CDCl3) 7.28-7.16 (6 H, m), 6.89-6.80 (6 H, m), 6.75 (1 H, d, *J* 9.8 Hz), 5.85 (1 H, s), 5.39 (1 H, d, *J* 9.8 Hz), 5.32 (1 H, m), 4.62 (1 H, d, *J* 11.0 Hz), 4.51 (1 H, d, *J* 10.7 Hz), 4.46 (1 H, d, *J* 10.7 Hz), 4.46-4.40 (4 H, m), 3.89 (1 H, m), 3.78 (3 H, s), 3.77 (3 H, s), 3.77 (3 H, s), 3.75-3.57 (5 H, m), 3.08 (1 H, t, *J* 5.1 Hz), 2.82-2.65 (2 H, m), 2.34 (1 H, br s), 1.91 (3 H, s), 1.77 (3 H, s), 1.74 (3 H, s), 1.45-1.12 (21 H, m), 1.01 (3 H, d, *J* 6.6 Hz), 0.94 (3 H, d, *J* 6.6 Hz), 0.90 (3 H, d, *J* 6.6 Hz), 0.88 (3 H, d, *J* 6.8 Hz);C (100 MHz, CDCl3) 167.7, 159.2, 158.9, 145.0, 134.3, 134.1, 132.9, 131.5, 131.2, 130.1, 129.2, 129.0, 128.7, 113.7, 113.5, 87.2, 82.8, 74.4, 72.7, 72.7, 70.7, 62.3, 55.2, 55.2, 37.3, 36.2, 35.7, 34.1, 31.9, 29.9, 29.6, 29.6, 29.6, 29.3, 28.3, 27.3, 27.3, 22.6, 18.4, 17.1, 16.6, 14.8, 14.1, 12.8, 12.6; *m/z* (ESI) 815 (M+Na)+.

# The corresponding diols were prepared in a similar manner as the diol as above (56%, and 61%, respectively).

# Diol from 107:H (400 MHz, CDCl3) 7.24 (2 H, d, *J* 8.5 Hz), 7.23 (2 H, d, *J* 8.5 Hz), 6.86 (2 H, d, *J* 8.5 Hz), 6.84 (2 H, d, *J* 8.5 Hz), 6.71 (1 H, d, *J* 10.0 Hz), 5.86 (1 H, s), 5.40 (1 H, d, *J* 9.5 Hz), 5.11 (1 H, m), 4.52 (1 H, d, *J* 10.8 Hz), 4.50 (1 H, d, *J* 11.7 Hz), 4.47 (1 H, d, *J* 10.8 Hz), 4.44 (2 H, d, *J* 11.7 Hz), 3.83-3.73 (1 H, m), 3.78 (3 H, s), 3.78 (3 H, s), 3.61 (2 H, t, *J* 6.4 Hz), 3.56 (1 H, dd, *J* 10.5, 5.6 Hz), 3.50 (1 H, dd, *J* 10.5, 4.4 Hz), 3.09 (1 H, dd, *J* 5.4, 5.1 Hz), 2.82-2.66 (2 H, m), 1.89 (3 H, s), 1.89-1.80 (2 H, m), 1.77 (3 H, s), 1.75 (3 H, s), 1.75-1.51 (2 H, m), 1.44-1.12 (19 H, m), 1.01 (3 H, d, *J* 6.8 Hz), 0.94 (3 H, d, *J* 6.8 Hz), 0.89 (3 H, d, *J* 6.8 Hz), 0.88 (3 H, d, *J* 6.8 Hz); C (100 MHz, CDCl3) 167.3, 159.3, 159.2, 158.8, 145.7, 134.2, 134.2, 134.1, 132.8, 131.5, 131.1, 129.9, 129.6, 129.2, 128.9, 128.4, 113.8, 113.7, 113.5, 87.2, 82.8, 76.4, 74.3, 73.2, 72.7, 71.9, 67.8, 60.1, 55.1, 55.1, 55.1, 37.3, 36.1, 35.7, 34.1, 33.0, 31.8, 29.9, 29.6, 29.6, 29.6, 29.3, 27.2, 22.6, 18.4, 17.0, 16.6, 14.8, 14.0, 12.8, 12.6; *m/z* (ESI) 951 (M+Na)+.

# Diol from 110:H (400 MHz, CDCl3) 7.27-7.17 (8 H, m), 6.88-6.81 (8 H, m), 6.75 (1 H, d, *J* 10.3 Hz), 5.84 (1 H, s), 5.47 (1 H, m), 5.39 (1 H, d, *J* 10.2 Hz), 4.64 (1 H, d, *J* 10.8 Hz), 4.55 (1 H, d, *J* 10.8 Hz), 4.52-4.37 (6 H, m), 3.93 (1 H, m), 3,79 (3 H, s), 3.79 (3 H, s), 3.79 (3 H, s), 3.79 (3 H, s), 3.78-3.60 (6 H, m), 3.08 (1 H, t, *J* 5.4 Hz), 2.80-2.70 (2 H, m), 1.90 (3 H, s), 1.77 (3 H, s), 1.71 (3 H, s), 1.45-1.15 (19 H, m), 1.02 (3 H, d, *J* 6.8 Hz), 0.94 (3 H, d, *J* 6.6 Hz), 0.89 (3 H, d, *J* 6.8 Hz), 0.88 (3 H, d, *J* 6.6 Hz);c (100 MHz, CDCl3) 167.2, 159.32, 159.28, 159.2, 145.7, 134.9, 134.1, 133.1, 131.6, 131.2, 130.2, 130.0, 129.7, 129.5, 129.3, 129.0, 128.5, 113.9, 113.8, 113.7, 113.6, 87.3, 83.1, 74.4, 73.5, 72.7, 71.6, 68.0, 61.3, 60.4, 55.2, 37.3, 36.2, 35.8, 34.1, 31.9, 30.0, 29.7, 29.3, 27.3, 22.7, 21.0, 18.5, 17.1, 16.7, 14.9, 14.2, 14.1, 12.7, 12.5.

# To a solution of the diol (from 104, 80.0 mg, 0.101 mmol) and pyridine (0.041 mL, 0.51 mmol) in dichloromethane (2.0 mL) was added Dess–Martin periodinane (171 mg, 0.403 mmol) at 0 ˚C. After stirred at room temperature for 2.5 h, the reaction mixture was diluted with EtOAc. The organic layer was washed with saturated NaHCO3, 10% NaHSO3, and brine, dried over Na2SO4, and evaporated. The residue was filtered through a short column of silica gel (hexane:EtOAc = 2:1) to give the crude aldehyde as a colorless oil, which was used without further purification. To a solution of the crude aldehyde in *tert*-butyl alcohol (0.4 mL) and 2-methyl-2-butene (0.2 mL) was added a mixture of sodium chlorite (66 mg) and sodium dihydrogenphosphate (66 mg) in water (0.4 mL). After stirred for 6 h at room temperature, the reaction mixture was diluted with EtOAc and 0.5 M KHSO4. The organic layer was separated, and the aqueous layer was extracted with EtOAc. The combined organic layer was washed with 10% NaHSO3 and brine, dried over Na2SO4, and evaporated. The resulting residue was purified by preparative thin layer chromatography on silica gel (chloroform:MeOH = 10:1) to give the corresponding acid (40.5 mg, 2 steps 50%) as a colorless oil. H (300 MHz, CDCl3) 7.26-7.10 (6 H, m), 6.99 (1 H, s), 6.92-6.74 (7 H, m), 5.78 (1 H, d, J 9.5 Hz), 5.16 (1 H, m), 4.63-4.35 (6 H, m), 4.29-4.16 (2 H, m), 3.79 (3 H, s), 3.78 (3 H, s), 3.77 (3 H, s), 3.69-3.56 (2 H, m), 3.13 (1 H, dd, *J* 5.3, 5.0 Hz), 2.90-2.43 (3 H, m), 1.93 (3 H, s), 1.87 (3 H, s), 1.86 (3 H, s), 1.48-1.05 (19 H, m), 1.05 (3 H, d, *J* 6.6 Hz), 0.96 (3 H, d, *J* 6.6 Hz), 0.90-0.85 (3 H, m), 0.88 (3 H, d, *J* 6.8 Hz); C (100 MHz, CDCl3) 203.6, 177.5, 167.0, 159.1, 159.0, 144.4, 142.3, 141.3, 133.3, 131.5, 131.2, 130.0, 129.2, 129.1, 127.5, 113.8, 113.6, 87.1, 74.6, 72.8, 72.1, 70.2, 40.0, 36.4, 36.2, 34.0, 31.9, 30.0, 29.9, 29.9, 29.6, 29.6, 29.3, 27.2, 26.5, 22.7, 18.4, 18.2, 16.6, 14.9, 14.0, 12.9, 12.5; *m/z* (ESI) 827 (M+Na)+.

# The corresponding acids were prepared in a similar manner as above (34% and 31%, respectively).

# Carboxylic acid from 107: H (300 MHz, CDCl3) 7.28-7.18 (4 H, m), 6.98 (1 H, s), 6.92-6.80 (5 H, m), 5.11 (1 H, m), 4.58-4.37 (4 H, m), 4.21 (1 H, m), 3.80 (3 H, s), 3.78 (3 H, s), 3.61-3.40 (2 H, m), 3.13 (1 H, dd, *J* 5.3, 5.1 Hz), 2.82 (1 H, m), 2.47-2.27 (2 H, m), 2.14-1.94 (2 H, m), 1.94 (3 H, s), 1.88 (3 H, s), 1.87 (3 H, s), 1.50-1.05 (19 H, m), 1.05 (3 H, d, *J* 6.8 Hz), 0.95 (3 H, d, *J* 6.6 Hz), 0.90-0.87 (3 H, m), 0.88 (3 H, d, *J* 6.8 Hz);C (100 MHz, CDCl3) 203.9, 174.1, 166.5, 159.3, 159.2, 159.2, 144.6, 142.6, 141.4, 133.3, 132.0, 131.5, 131.1, 130.0, 129.6, 129.3, 129.1, 127.6, 113.7, 113.7, 113.6, 87.2, 74.5, 73.8, 72.8, 72.7, 72.2, 67.7, 55.6, 55.2, 55.2, 40.0, 36.8, 36.4, 36.2, 34.0, 31.9, 29.9, 29.6, 29.6, 29.6, 29.3, 27.2, 22.7, 18.2, 18.6, 16.6, 14.9, 14.0, 13.4, 12.7.

# Carboxylic acid from 110: H (400 MHz, CDCl3) 7.27-7.15 (6 H, m), 7.08 (2 H, d, *J* 8.3 Hz), 6.90-6.77 (10 H, m), 5.84 (1 H, d, *J* 9.8 Hz), 5.30 (1 H, m), 4.78 (1 H, d, *J* 12.1 Hz), 4.57-4.30 (7 H, m), 4.23-4.16 (2 H, m), 3.83-3.70 (3 H, m), 3.80 (3 H, s), 3.79 (3 H, s), 3.78 (3 H, s), 3.78 (3 H, s), 3.14 (1 H, dd, *J* 5.3, 5.1 Hz), 2.84 (1 H, m), 1.96 (3 H, s), 1.90 (3 H, s), 1.82 (3 H, s), 1.45-1.12 (19 H, m), 1.07 (3 H, d, *J* 6.8 Hz), 0.97 (3 H, d, *J* 6.8 Hz), 0.89 (3 H, d, *J* 6.8 Hz), 0.88 (3 H, d, *J* 6.8 Hz); c (100 MHz, CDCl3) 171.6, 165.7, 159.35. 159.33, 159.20, 159.18, 145.9, 141.9, 133.0, 131.7, 131.2, 130.5, 129.8, 129.6, 129.4, 129.2, 128.2, 113.84, 113.81, 87.3, 78.3, 77.3, 74.9, 74.4, 72.9, 72.5, 72.2, 71.0, 68.0, 55.3, 34.1, 32.0, 30.1, 29.8, 29.5, 27.3, 22.8, 19.6, 18.4, 17.1, 16.7, 15.1, 14.2, 13.5, 12.8; *m/z* (ESI) 1099 (M+Na)+.

# To a solution of the acid (35.0 mg, 0.043 mmol) in dichloromethane (3.0 mL) was added BCl3 (0.13 mL, 0.13 mmol, 1.0 M in heptane) at –78 ˚C. After stirred at this temperature for 5 min, the reaction mixture was quenched with saturated NaHCO3 and poured into aqueous citric acid and EtOAc was added. The organic layer was separated, and the aqueous layer was extracted with EtOAc. The combined organic layer was washed with brine, dried over Na2SO4, and evaporated. The resulting residue was purified by preparative thin layer chromatography on silica gel (chloroform:MeOH:H2O = 4:1:0.1) to give the derivative (34) (3.1 mg, 20%) as a colorless oil.H (500 MHz, CDCl3) 7.00 (1 H, s), 6.85 (1 H, dd, *J* 9.7, 1.5 Hz), 5.61 (1 H, d, *J* 9.7 Hz), 5.02 (1 H, m), 4.19 (1 H, dq, *J* 9.7, 7.0 Hz), 3.76 (1 H, dd, *J* 12.2, 4.0 Hz), 3.72 (1 H, dd, *J* 12.2, 5.8 Hz), 3.34 (1 H, dd, *J* 7.6, 4.0 Hz), 2.71 (1 H, m), 2.45 (1 H, ddd, *J* 15.8, 7.9, 5.2 Hz), 2.35 (1 H, ddd, *J* 15.8, 8.2, 5.2 Hz), 2.10 (1 H, m), 2.03 (1 H, m), 1.97 (3 H, d, *J* 0.9 Hz), 1.93 (3 H, d, *J* 0.9 Hz), 1.90 (3 H, d, *J* 1.2 Hz), 1.62 (1 H, m), 1.32-1.25 (18 H, m), 1.29 (3 H, d, *J* 7.0 Hz), 0.99 (3 H, d, *J* 6.7 Hz), 0.91 (3 H, d, *J* 7.0 Hz), 0.88 (3 H, t, *J* 7.0 Hz); HRMS (ESI) calcd. for C33H55O7 (M-H)- 563.3948, found 563.3962.

# The derivative (35) and (36) were prepared in a similar manner (20% and 34%, respectively).

# 35H (500 MHz, CDCl3) 6.96 (1 H, s), 6.83 (1 H, d, *J* 8.5 Hz), 5.61 (1 H, d, *J* 10.0 Hz), 4.91 (1 H, m), 4.31 (1 H, m), 4.17 (1 H, dq, *J* 8.5, 6.7 Hz), 3.87 (2 H, m), 3.33 (1 H, dd, *J* 7.3, 4.3 Hz), 2.70 (1 H, m), 2.65-2.58 (2 H, m), 1.95 (3 H, s), 1.91 (3 H, s), 1.91 (3 H, s), 1.60 (1 H, m), 1.40-1.20 (18 H, m), 1.24 (3 H, d, *J* 7.3 Hz), 0.99 (3 H, d, *J* 6.7 Hz), 0.90 (3 H, d, *J* 6.7 Hz), 0.88 (3H, t, *J* 7.0 Hz); HRMS (ESI) calcd. for C33H55O8 (M-H)- 579.3897, found 579.3895.

# 36H(400 MHz; CD3OD) 7.09 (1 H, s), 6.74 (1 H, d *J* 9.8 Hz), 5.72 (1 H, d, *J* 9.8 Hz), 5.22 (1 H, m), 4.36 (1 H, m), 3.75-4.00 (4 H, m), 3.25 (1 H, t, *J* 5.7 Hz), 2.74 (1 H, m), 1.96 (3 H, s), 1.93 (3 H, s), 1.90 (3 H, s), 1.53 (1 H, m), 1.20 (3 H, d, *J* 6.8 Hz), 1.15-1.45 (18 H, m), 1.00 (3 H, d, *J* 6.7 Hz), 0.91 (3 H, d, *J* 6.6 Hz), 0.89 (3 H, t, *J* 6.8 Hz); HRMS (ESI) calcd. for C33H55O9 (M-H)- 595.3846, found 595.3846.

# Synthesis of derivatives 111-115

# (3*R*,4*S*,5*S*)-4,5-Dihydroxy-6-oxotetrahydro-2H-pyran-3-yl (2*E*,4*R*,6*E*,8*E*,10*S*,11*R*,12*S*)-5-oxo-2,4,6,8,10,12-hexamethyl -11-hydroxy-2,6,8-docosatrienoate 111

# To a solution of synthetic khafrefungin (1) (50.0 mg, 0.0839 mmol) in dichloromethane (1.0 mL) was added trifluoroacetic acid (0.25 mL) at 0 ˚C. After stirred at this temperature for 1 h, the reaction mixture was warmed to room temperature and further stirred for 2 h. The mixture was concentrated under reduced pressure. The resulting residue was purified by preparative thin layer chromatography on silica gel (hexane:EtOAc = 2:3) to give the derivative (111) (21.1 mg, 41%) as a colorless oil and recovered khafrefungin (1) (24.7 mg, 49%). H (400 MHz, CD3OD) 7.12 (1 H, s), 6.79 (1 H, dd, *J* 9.8, 1.4 Hz), 5.75 (1 H, d, *J* 9.8 Hz), 5.40 (1 H, ddd, *J* 3.2, 2.7, 2.2 Hz), 4.46 (1 H, dd, *J* 12.7, 2.2 Hz), 4.41 (1 H, dq, *J* 9.8, 6.8 Hz), 4.36 (1 H, dd, *J* 12.7, 2.7 Hz), 4.34 (1 H, d, *J* 10.0 Hz), 4.12 (1 H, dd, *J* 10.0, 3.2 Hz), 3.25 (1 H, dd, *J* 5.9, 5.6 Hz), 2.75 (1 H, m), 1.96 (3 H, d, *J* 1.5 Hz), 1.94 (3 H, s), 1.91 (3 H, d, *J* 1.0 Hz), 1.53 (1 H, m), 1.40-1.15 (18 H, m), 1.21 (3 H, d, *J* 6.6 Hz), 1.01 (3 H, d, *J* 6.8 Hz), 0.91 (3 H, d, *J* 6.8 Hz), 0.89 (3 H, t, *J* 7.1 Hz); HRMS (ESI) calcd. for C33H53O8 (M-H)- 577.3741, found 577.3727.

# (3*R*,4*S*,5*S*)-4-Hydroxy-5-acetoxy-6-oxotetrahydro-2H-pyran-3-yl (2*E*,4*R*,6*E*,8*E*,10*S*,11*R*,12*S*)-5-oxo-2,4,6,8,10,12-hexamethyl-11-hydroxy-2,6,8-docosatrienoate 112

# To a mixture of the derivative (111) and pyridine (0.010 mL, 0.12 mmol) in dichloromethane (0.5 mL) was added acetic acid anhydride (0.005 mL) at 0 ˚C. After stirred at room temperature for 12 h, the reaction mixture was diluted with EtOAc. The organic layer was washed with 10% KHSO4, saturated NaHCO3, and brine, dried over NaSO4, and evaporated. The resulting residue was purified by preparative thin layer chromatography on silica gel (hexane:EtOAc = 1:1) to give the derivative (112) (1.0 mg, 10%) as a colorless oil.H (400 MHz, CDCl3) 6.92 (1 H, s), 6.91 (1 H, d, *J* 9.5 Hz), 5.58 (1 H, d, *J* 10.0 Hz), 5,46 (1 H, m), 5.36 (1 H, d, *J* 9.8 Hz), 4.52 (1 H, dd, *J* 12.9, 2.4 Hz), 4.45 (1 H, dd, *J* 12.9, 2.2 Hz), 4.38 (1 H, dd, *J* 9.5, 3.2 Hz), 4.18 (1 H, dq, *J* 9.5, 6.8 Hz), 3.31 (1 H, dd, *J* 7.8, 3.9 Hz), 2.70 (1 H, m), 2.22 (3 H, s), 1.97 (3 H, s), 1.96 (3 H, s), 1.92 (3 H, s), 1.35-1.19 (22 H, m), 0.98 (3 H, d, *J* 6.6 Hz), 0.90 (3 H, d, *J* 6.8 Hz), 0.88 (3 H, t, *J* 7.1 Hz); HRMS (ESI) calcd. for C35H55O9 (M-H)- 619.3846, found 619.3849.

# Methyl (2*S*,3*S*,4*R*)-2,3,5-trihydroxy-4-[[(2*E*,4*R*,6*E*,8*E*,10*S*,11*R*,12*S*)-1,5-dioxo-

# 2,4,6,8,10,12-hexamethyl -11-hydroxy-2,6,8-docosatrienyl]oxy]pentanoate 113

# Methyl (2*S*,3*R*,4*S*)-2,3,4-trihydroxy-5-[[(2*E*,4*R*,6*E*,8*E*,10*S*,11*R*,12*S*)-1,5-dioxo-

# 2,4,6,8,10,12-hexamethyl -11-hydroxy-2,6,8-docosatrienyl]oxy]pentanoate 114

# [(2*R*,3*S*,4*S*)-3,4-Dihydroxy-5-oxotetrahydrofuran-2-yl]methyl (2*E*,4*R*,6*E*,8*E*,10*S*,

# 11*R*,12*S*)-5-oxo-2,4,6,8,10,12-hexamethyl-11-hydroxy-2,6,8-docosatrienoate 115

# To a solution of synthetic khafrefungin (1) (6.5 mg, 0.0092 mmol) in MeOH (0.5 mL) was added a few of 2.0 M (trimethylsilyl)diazomethane in hexane at 0 ˚C. After stirred at this temperature for 5 h, the mixture was concentrated under reduced pressure. The resulting residue was purified by preparative thin layer chromatography on silica gel (hexane:EtOAc = 1:2) to give the derivative (113) (0.8 mg, 12%) as a colorless oil, the derivative (114) (1.1 mg, 15%) as a colorless oil, and the derivative (115) (1.0 mg, 12%) as a colorless oil.

# 113H (400 MHz, CDCl3) 6.91 (1 H, s), 6.86 (1 H, dd, *J* 10.0, 1.4 Hz), 5.58 (1 H, d, *J* 9.5 Hz), 4.99 (1 H, ddd, *J* 8.3, 4.2, 3.6 Hz), 4.24 (1 H, dd, *J* 8.3, 6.4 Hz), 4.21 (1 H, d, *J* 6.4 Hz), 4.18 (1 H, dq, *J* 10.0, 6.6 Hz), 4.00 (1 H, dd, *J* 12.4, 3.6 Hz), 3.94 (1 H, dd, *J* 12.4, 4.2 Hz), 3.83 (3 H, s), 3.30 (1 H, dd, *J* 7.8, 4.2 Hz), 2.70 (1 H, m), 1.96 (3 H, d, *J* 1.4 Hz), 1.95 (3 H, d, *J* 1.1 Hz), 1.91 (3 H, d, *J* 1.2 Hz), 1.30-1.16 (22 H, m), 0.99 (3 H, d, *J* 6.8 Hz), 0.90 (3 H, d, *J* 6.6 Hz), 0.88 (3 H, t, *J* 6.8 Hz); HRMS (ESI) calcd. for C34H59O9 (M+H)+ 611.4159, found 611.4124.

# 114H (400 MHz, CDCl3) 6.98 (1 H, s), 6.86 (1 H, dd, *J* 9.8, 1.4 Hz), 5.59 (1 H, d, *J* 9.5 Hz), 4.48 (1 H, dd, *J* 11.9, 3.2 Hz), 4.38 (1 H, dd, *J* 11.9, 5.8 Hz), 4.22 (1 H, dd, *J* 6.4, 5.8 Hz), 4.18 (1 H, dq, *J* 9.8, 6.8 Hz), 3.96 (1 H, ddd, *J* 8.6, 5.8, 3.2 Hz), 3.85 (3 H, s), 3.84 (1 H, d, *J* 8.6 Hz), 3.30 (1 H, dd, *J* 7.3, 4.2 Hz), 2.70 (1 H, m), 1.96 (3 H, d, *J* 1.0 Hz), 1.95 (3 H, d, *J* 1.4 Hz), 1.91 (3 H, d, *J* 1.2 Hz), 1.38-1.17 (19 H, m), 1.24 (3 H, d, *J* 6.8 Hz), 0.99 (3 H, d, *J* 6.6 Hz), 0.91 (3 H, d, *J* 6.8 Hz), 0.86 (3 H, t, *J* 7.1 Hz); HRMS (ESI) calcd. for C34H59O9 (M+H)+ 611.4159, found 611.4173.

(**115**):H (400 MHz, CDCl3) 6.89 (1 H, s), 6.83 (1 H, dd, *J* 10.0, 1.2 Hz), 5.59 (1 H, d, *J* 9.8 Hz), 4.48 (2 H, m), 4.45 (1 H, d, *J* 8.6 Hz), 4.38 (1 H, ddd, *J* 8.0, 4.4, 3.6 Hz), 4.26 (1 H, dd, *J* 8.3, 8.0 Hz), 4.12 (1 H, dq, *J* 10.0, 6.8 Hz), 3.36 (1 H, dd, *J* 7.3, 4.2 Hz), 2.70 (1 H, m), 1.96 (3 H, d, *J* 1.0 Hz), 1.94 (3 H, d, *J* 1.2 Hz), 1.92 (3 H, d, *J* 1.2 Hz), 1.35-1.20 (19 H, m), 1.24 (3 H, d, *J* 6.8 Hz), 0.99 (3 H, d, *J* 6.6 Hz), 0.90 (3 H, d, *J* 6.6 Hz), 0.88 (3 H, t, *J* 7.1 Hz); HRMS (ESI) calcd. for C33H53O8 (M-H)- 577.3741, found 577.3754.
